# Supplementary material for: Comprehensive Analysis of Binding Sites in Tubulin
Source: PubMed Central journal article supplement — Angew Chem Int Ed Engl. 2021 May 5;60(24):13331–42. doi: 10.1002/anie.202100273 (PMC8251789; doi:10.1002/anie.202100273), 2021-05-05
Supplement: ANIE-60-13331-s001.pdf [file ANIE-60-13331-s001.pdf]

**Table S5. Contact points of protein partners that overlap with predicted pockets or fragment sites in tubulin.**

**β-Tubulin**

| sID/pID <sup>1</sup> | ResID <sup>2</sup>                                                                                                                                                                                                                                                                                                                                                                 | Protein <sup>3</sup>                                                       | Structural element involved <sup>4</sup>                                      |
|----------------------|------------------------------------------------------------------------------------------------------------------------------------------------------------------------------------------------------------------------------------------------------------------------------------------------------------------------------------------------------------------------------------|----------------------------------------------------------------------------|-------------------------------------------------------------------------------|
| sID βI               | βAsp 211<br>βIle 212<br><b>βArg 215</b><br>βThr 216<br><b>βSer 298</b><br><b>βLys 299</b>                                                                                                                                                                                                                                                                                          | Targeting protein for Xklp2 (TPX2)<br><br>PDB ID: 6BJC                     | C-terminal unstructured part of the wedge domain<br><br>Binds also to sID βαI |
| sID βV               | <b>αHis 406</b><br><b>αVal 409</b><br><b>αGly 410</b><br><b>αGlu 411</b><br>βPhe 135<br>βIle 154<br>βIle 157<br><b>βArg 158</b><br>βTyr 161<br><b>βPro 162</b><br><b>βAsp 163</b><br>βArg 164<br>βIle 165<br>βMet 166<br><b>βVal 195</b><br><b>βGlu 196</b><br><b>βAsn 197</b><br>βThr 198<br><b>βAsp 199</b><br>βArg 253<br><b>βPro 263</b><br><b>βArg 264</b><br><b>βHis 266</b> | Cytoplasmic dynein 1 heavy chain<br><br>PDB ID: 3J1U, 3J1T, 6RZA, 6RZB     | Helix 1 of the microtubule-binding domain                                     |
| sID βV               | <i>αHis 406</i><br><i>αVal 409</i><br><i>αGly 410</i><br><i>αGlu 411</i><br>βPhe 135<br>βIle 154<br>βIle 157<br><i>βArg 158</i><br>βTyr 161<br>βPro 162<br>βAsp 163<br>βArg 164<br>βIle 165<br>βMet 166<br>βVal 195<br><i>βGlu 196</i><br>βAsn 197                                                                                                                                 | Centrosomal P4.1-associated protein (CPAP/SAS-4)<br><br>PDB ID: 5ITZ, 5EIB | Helical SAC region of the N-terminal PN2-3 domain                             |

|  |                                                                      |  |  |
|--|----------------------------------------------------------------------|--|--|
|  | βThr 198<br>βAsp 199<br>βArg 253<br>βPro 263<br>βArg 264<br>βHis 266 |  |  |
|--|----------------------------------------------------------------------|--|--|

### β1α2-Tubulin

| sID/pID <sup>1</sup> | ResID <sup>2</sup>                                                                                                                                                    | Protein <sup>3</sup>                                   | Structural element involved <sup>4</sup>                                     |
|----------------------|-----------------------------------------------------------------------------------------------------------------------------------------------------------------------|--------------------------------------------------------|------------------------------------------------------------------------------|
| sID βαI              | αTyr 262<br>αPro 263<br>αArg 264<br>αIle 265<br>αAsp 431<br>αGlu 434<br>αVal 435<br>βArg 400<br>βArg 401<br>βLys 402                                                  | Kinesin-13<br><br>PDB ID: 5MIO, 6BBN, 6B0I             | L2 hairpin specific to the motor domain of kinesin-13 family members         |
| sID βαI              | αTyr 262<br>αPro 263<br>αArg 264<br>αIle 265<br>αAsp 431<br>αGlu 434<br>αVal 435<br>βArg 400<br>βArg 401<br>βLys 402                                                  | Kinesin-5<br><br>PDB ID: 5MM7                          | Loop L2 of the motor domain of <i>Ustilago maydis</i> kinesin-5              |
| sID βαI              | <b>αTyr 262</b><br><b>αPro 263</b><br>αArg 264<br>αIle 265<br><b>αAsp 431</b><br><b>αGlu 434</b><br>αVal 435<br><b>βArg 400</b><br><b>βArg 401</b><br><b>βLys 402</b> | Targeting protein for Xklp2 (TPX2)<br><br>PDB ID: 6BJC | N-terminal unstructured part of the ridge domain<br><br>Binds also to sID βI |
| sID βαI              | αTyr 262<br>αPro 263<br><b>αArg 264</b><br>αIle 265<br><b>αAsp 431</b><br><b>αGlu 434</b><br><b>αVal 435</b><br><b>βArg 400</b><br><b>βArg 401</b><br><b>βLys 402</b> | Tau<br><br>PDB ID: 6CVN, 6CVJ                          | R1 and R2 repeats                                                            |

|                                  |                                                                                                                                                                                                                                                                                                                                                                                                                                                                                                                                                                                                                                                                      |                                                                    |                             |
|----------------------------------|----------------------------------------------------------------------------------------------------------------------------------------------------------------------------------------------------------------------------------------------------------------------------------------------------------------------------------------------------------------------------------------------------------------------------------------------------------------------------------------------------------------------------------------------------------------------------------------------------------------------------------------------------------------------|--------------------------------------------------------------------|-----------------------------|
| sID $\beta\alpha^{\alpha}$       | <i><math>\alpha</math>Tyr 262</i><br><i><math>\alpha</math>Pro 263</i><br><i><math>\alpha</math>Arg 264</i><br><i><math>\alpha</math>lle 265</i><br><i><math>\alpha</math>Asp 431</i><br><i><math>\alpha</math>Glu 434</i><br><i><math>\alpha</math>Val 435</i>                                                                                                                                                                                                                                                                                                                                                                                                      | iE5 alphaRep<br><br>PDB ID: 6GWC                                   | Helix 2 of the N-cap        |
| sID $\beta\alpha_{III}^{\alpha}$ | <i><math>\alpha</math>Leu 248</i><br><i><math>\alpha</math>Val 250</i><br><i><math>\alpha</math>Asn 258</i><br><i><math>\alpha</math>Pro 325</i><br><i><math>\alpha</math>Val 328</i><br><i><math>\alpha</math>Asn 329</i><br><i><math>\alpha</math>lle 332</i><br><i><math>\alpha</math>Pro 348</i><br><i><math>\alpha</math>Gly 350</i><br><i><math>\alpha</math>Phe 351</i><br><i><math>\alpha</math>Lys 352</i><br><i><math>\alpha</math>Val 353</i><br><i><math>\alpha</math>Gly 354</i><br><i><math>\alpha</math>lle 355</i>                                                                                                                                   | Stathmin like domain of RB3<br><br>PDB ID: 1FFX, 6GVM              | N-terminal $\beta$ -hairpin |
| sID $\beta\alpha_{III}^{\beta}$  | <i><math>\beta</math>Pro 173</i><br><i><math>\beta</math>Ser 174</i><br><i><math>\beta</math>Pro 175</i><br><i><math>\beta</math>Lys 176</i><br><i><math>\beta</math>Val 177</i><br><i><math>\beta</math>Ser 178</i><br><i><math>\beta</math>Asp 179</i><br><i><math>\beta</math>Thr 180</i><br><i><math>\beta</math>Val 181</i><br><i><math>\beta</math>Glu 183</i><br><i><math>\beta</math>Pro 184</i><br><i><math>\beta</math>Tyr 210</i><br><i><math>\beta</math>Thr 221</i><br><i><math>\beta</math>Pro 222</i><br><i><math>\beta</math>Thr 223</i><br><i><math>\beta</math>Tyr 224</i><br><i><math>\beta</math>Leu 227</i><br><i><math>\beta</math>Gln 394</i> | Designed Ankyrin Repeat Protein (DARPin)<br><br>PDB ID: 4DRX, 5EYP | Repeat 4                    |

### **$\alpha$ -Tubulin**

| sID/pID <sup>1</sup>            | ResID <sup>2</sup>                                                                                                                                                                                                                                              | Protein <sup>3</sup>                              | Structural element involved <sup>4</sup>              |
|---------------------------------|-----------------------------------------------------------------------------------------------------------------------------------------------------------------------------------------------------------------------------------------------------------------|---------------------------------------------------|-------------------------------------------------------|
| pID $\alpha$ 1<br>( $\alpha$ 1) | <i><math>\alpha</math>Phe 141</i><br><i><math>\alpha</math>Tyr 172</i><br><i><math>\alpha</math>Met 203</i><br><i><math>\alpha</math>Val 204</i><br><i><math>\alpha</math>Asp 205</i><br><i><math>\alpha</math>Glu 207</i><br><i><math>\alpha</math>Phe 267</i> | Tubulin Tyrosine Ligase (TTL)<br><br>PDB ID: 4IHJ | Loops $\beta$ 3- $\beta$ 4 and $\alpha$ 9- $\beta$ 13 |

|                  |                                                                                                                                                                                                                                                                                                                                                                          |                                                                    |                                                                     |
|------------------|--------------------------------------------------------------------------------------------------------------------------------------------------------------------------------------------------------------------------------------------------------------------------------------------------------------------------------------------------------------------------|--------------------------------------------------------------------|---------------------------------------------------------------------|
|                  | <p> <i>α</i>Pro 268<br/> <i>α</i>Leu 269<br/> <i>α</i>Ala 270<br/> <i>α</i>Val 303<br/> <i>α</i>Lys 304<br/> <i>α</i>Cys 305<br/> <i>α</i>Asp 306<br/> <i>α</i>Pro 307<br/> <i>α</i>His 309<br/> <i>α</i>Ala 383<br/> <i>α</i>lle 384<br/> <i>α</i>Glu 386<br/> <i>α</i>Ala 387<br/> <i>α</i>Trp 388<br/> <i>α</i>Arg 390<br/> <i>α</i>Leu 391<br/> <i>α</i>Lys 394 </p> |                                                                    |                                                                     |
| pID <i>α</i> V   | <p> <i>α</i>Pro 274<br/> <i>α</i>lle 276<br/> <i>α</i>Lys 280<br/> <i>α</i>Ala 281<br/> <i>α</i>Tyr 282<br/> <i>α</i>His 283<br/> <i>α</i>Glu 284<br/> <i>α</i>Gln 285<br/> <i>α</i>Leu 286<br/> <i>α</i>Ala 369<br/> <i>α</i>Lys 370<br/> <i>α</i>Val 371<br/> <i>α</i>Gln 372<br/> <i>α</i>Arg 373 </p>                                                                | <p> Stu2p/Alp14p<br/> <br/> PDB ID: 6MZG </p>                      | <p> Helix HRA4 of the tumor overexpressed gene 1 (TOG1) domain </p> |
| pID <i>α</i> VI  | <p> <i>α</i>Asn 258<br/> <i>α</i>Pro 261<br/> <i>α</i>Met 313<br/> <i>α</i>Ala 314<br/> <i>α</i>Cys 315<br/> <i>α</i>Phe 343<br/> <i>α</i>Cys 347<br/> <i>α</i>Pro 348<br/> <i>α</i>Gly 350<br/> <i>α</i>Phe 351<br/> <i>α</i>Lys 352 </p>                                                                                                                               | <p> Stathmin like domain of RB3<br/> <br/> PDB ID: 1FFX, 6GVM </p> | <p> N-terminal <math>\beta</math>-hairpin </p>                      |
| pID <i>α</i> VII | <p> <i>α</i>Ser 54<br/> <i>α</i>Glu 55<br/> <i>α</i>Thr 56<br/> <i>α</i>Val 62<br/> <i>α</i>Pro 63<br/> <i>α</i>Arg 64<br/> <i>α</i>His 88<br/> <i>α</i>Glu 90<br/> <i>α</i>Gln 91<br/> <i>α</i>Arg 121<br/> <i>α</i>Lys 124 </p>                                                                                                                                        | <p> iiiA5 alphaRep<br/> <br/> PDB ID: 6GX7 </p>                    | <p> Helices 2 and 4 </p>                                            |

|  |                                      |  |  |
|--|--------------------------------------|--|--|
|  | $\alpha$ Leu 125<br>$\alpha$ Gln 128 |  |  |
|--|--------------------------------------|--|--|

<sup>1</sup>Pocket and site identifiers. Fragment sites that are located at the  $\beta$ Tub1- $\alpha$ Tub2 inter-dimer interface in the T<sub>2</sub>R-TTL complex and thus represent composite sites are considered separately as half sites; they are indicated with “ $\alpha$ ” and “ $\beta$ ” superscripts to denote whether they belong to  $\alpha$ - or  $\beta$ -tubulin, respectively.

<sup>2</sup>Tubulin residues that are involved in pocket or site formation (taken from Table S1 and Table S3). Residues that are shared between a pocket or a site and the tubulin-binding region of a protein partner (maximal distance of 4 Å) are shown in italic for unassembled “curved” tubulin and in bold for assembled “straight” tubulin. Residues that are shared between a pocket or a site an adjacent tubulin chain, independent on the conformational tubulin state are shown in both bold and italics.

<sup>3</sup>Protein partners that target a pocket or a site. The Protein Data Bank IDs of the structures that were used for the analysis are indicated. For some proteins, the composite fragment sites located at the  $\beta$ Tub1- $\alpha$ Tub2 inter-dimer interface were split and considered separately as sub  $\beta$ -tubulin and sub  $\alpha$ -tubulin sites (indicated with superscripts).

<sup>4</sup>Structural elements of the protein partner that is involved in the interaction with a pocket or a site.
