# Supplementary material for: Comprehensive Analysis of Binding Sites in Tubulin
Source: PubMed Central journal article supplement — Angew Chem Int Ed Engl. 2021 May 5;60(24):13331–42. doi: 10.1002/anie.202100273 (PMC8251789; doi:10.1002/anie.202100273), 2021-05-05
Supplement: ANIE-60-13331-s002.pdf [file ANIE-60-13331-s002.pdf]

**Table S4. Contact points of tubulin dimers in the microtubule lattice that overlap with predicted pockets or fragment sites.**

**β1α2-Tubulin**

| pID/sID <sup>1</sup>            | ResID <sup>2</sup>                                                                                                                                                                                                                         | Secondary structural elements involved <sup>3</sup>                                              |
|---------------------------------|--------------------------------------------------------------------------------------------------------------------------------------------------------------------------------------------------------------------------------------------|--------------------------------------------------------------------------------------------------|
| sID βαII <sup>α</sup>           | αCys 4<br>αGln 133<br>αGly 134<br>αPhe 135<br>αLeu 136<br>αSer 165<br>αLeu 167<br>αAsp 199<br>αCys 200<br>αPhe 202<br>αLeu 242<br>αLeu 252<br><b>αThr 253</b><br><b>αGln 256</b><br><b>αThr 257</b><br>αLeu 259                            | βT3 and βH3' (longitudinal inter-tubulin dimer contact in microtubules)                          |
| -----<br>sID βαII <sup>β</sup>  | -----<br><b>βGly 100</b><br><b>βAsn 101</b><br>βAsn 102<br>βLys 105<br><b>βVal 182</b><br><b>βTrp 407</b><br>βTyr 408<br>βGlu 411                                                                                                          | -----<br>αH8 (longitudinal inter-tubulin dimer contact in microtubules)                          |
| sID βαIII <sup>α</sup>          | <b>αLeu 248</b><br>αVal 250<br><b>αAsn 258</b><br><b>αPro 325</b><br><b>αVal 328</b><br><b>αAsn 329</b><br>αIle 332<br><b>αPro 348</b><br><b>αGly 350</b><br><b>αPhe 351</b><br><b>αLys 352</b><br><b>αVal 353</b><br>αGly 354<br>αIle 355 | βT5 (longitudinal inter-tubulin dimer contact in microtubules)                                   |
| -----<br>sID βαIII <sup>β</sup> | -----<br>βPro 173<br>βSer 174<br>βPro 175<br><b>βLys 176</b><br><b>βVal 177</b>                                                                                                                                                            | -----<br>αH10, αH10-αS9 loop, and αS9 (longitudinal inter-tubulin dimer contact in microtubules) |

|  |                                                                                                                                                                                                                  |  |
|--|------------------------------------------------------------------------------------------------------------------------------------------------------------------------------------------------------------------|--|
|  | <b>βSer 178</b><br><b>βAsp 179</b><br><b>βThr 180</b><br><b>βVal 181</b><br>βGlu 183<br><b>βPro 184</b><br>βTyr 210<br><b>βThr 221</b><br><b>βPro 222</b><br>βThr 223<br><b>βTyr 224</b><br>βLeu 227<br>βGln 394 |  |
|--|------------------------------------------------------------------------------------------------------------------------------------------------------------------------------------------------------------------|--|

### α-Tubulin

| pID/sID <sup>1</sup> | ResID <sup>2</sup>                                                                                                                                                                                                                                                                                          | Secondary structural elements involved <sup>3</sup>                    |
|----------------------|-------------------------------------------------------------------------------------------------------------------------------------------------------------------------------------------------------------------------------------------------------------------------------------------------------------|------------------------------------------------------------------------|
| pID αI               | αTyr 172<br>αPro 173<br>αAla 174<br><b>αPro 175</b><br><b>αSer 178</b><br><b>αAla 180</b><br><b>αVal 181</b><br><b>αGlu 183</b><br>αPro 184<br>αSer 187<br>αAsp 205<br><b>αGlu 207</b><br>αLys 304<br>αCys 305<br>αAla 387<br>αArg 390<br>αLeu 391<br><b>αLys 394</b><br><b>αLeu 397</b><br><b>αMet 398</b> | βH10-βS9 loop (longitudinal intra-tubulin dimer contact)               |
| pID αVII             | <b>αSer 54</b><br><b>αGlu 55</b><br><b>αThr 56</b><br><b>αVal 62</b><br>αPro 63<br>αArg 64<br><b>αHis 88</b><br><b>αGlu 90</b><br>αGln 91<br><b>αArg 121</b><br><b>αLys 124</b><br>αLeu 125                                                                                                                 | Adjacent αM-loop (lateral inter-tubulin dimer contact in microtubules) |

|  |                                   |  |
|--|-----------------------------------|--|
|  | <b><math>\alpha</math>Gln 128</b> |  |
|--|-----------------------------------|--|

<sup>1</sup>Pocket and site identifiers. Fragment sites that are located at the  $\beta$ Tub1- $\alpha$ Tub2 inter-dimer interface in the T<sub>2</sub>R-TTL complex and thus represent composite sites are considered separately as half sites; they are indicated with “ $\alpha$ ” and “ $\beta$ ” superscripts to denote whether they belong to  $\alpha$ - or  $\beta$ -tubulin, respectively.

<sup>2</sup>Tubulin residues that are involved in pocket or site formation (taken from Table S1 and Table S3). Residues that are shared between a pocket or a site and an adjacent tubulin chain within the tubulin dimer or in the microtubule lattice (maximal distance of 4 Å) are shown in italic for unassembled “curved” tubulin and in bold for assembled “straight” tubulin. Residues that are shared between a pocket or a site an adjacent tubulin chain, independent on the conformational tubulin state are shown in both bold and italics.

<sup>3</sup>Secondary structural elements of the contacting tubulin monomer involved in interaction with residues forming a pocket or a site.

The Protein Data Bank ID of the microtubule structure that was used for the analysis is PDB ID 3JAR.
