# Supplementary material for: Comprehensive Analysis of Binding Sites in Tubulin
Source: PubMed Central journal article supplement — Angew Chem Int Ed Engl. 2021 May 5;60(24):13331–42. doi: 10.1002/anie.202100273 (PMC8251789; doi:10.1002/anie.202100273), 2021-05-05
Supplement: ANIE-60-13331-s005.pdf [file ANIE-60-13331-s005.pdf]

**Table S1. Tubulin pockets predicted by MD simulation.**

**β-Tubulin**

| pID <sup>1</sup> | Max. volume <sup>2</sup><br>(Å <sup>3</sup> ) | SS <sup>3</sup>                                      | ResID <sup>4</sup><br>(p > 20 %)                                                                                                                                                                                                                                                                                     | Average Volume <sup>5</sup><br>(Å <sup>3</sup> ) | Persistency <sup>6</sup><br>(%) | Notes                                                                                                |
|------------------|-----------------------------------------------|------------------------------------------------------|----------------------------------------------------------------------------------------------------------------------------------------------------------------------------------------------------------------------------------------------------------------------------------------------------------------------|--------------------------------------------------|---------------------------------|------------------------------------------------------------------------------------------------------|
| βI               | 271.5                                         | βT5<br>βH5<br>βH11                                   | <b>βPro 173</b> (β-ns)<br><b>βSer 174</b> (β-ns)<br>βPro 175<br><b>βSer 178</b> (β-ns)<br>βThr 180<br>βVal 181<br><b>βGlu 183</b> (β-ns)<br>βPro 184<br>βArg 390<br>βIle 391<br>βGln 394                                                                                                                             | 111.2                                            | 58                              | Part of the maytansine site where the C15-C33 moiety of plocabulin binds<br><br>Equivalent to pID αI |
| β-ns             | 738.5                                         | βH1<br>βS4<br>βT4<br>βS5<br>βT5<br>βH5<br>βH6<br>βH7 | <b>βGln 11</b> (βII)<br><b>βCys 12</b> (βII)<br><b>βGln 15</b> (βVI)<br>βIle 16<br><b>βSer 140</b> (βII)<br>βGly 142<br>βVal 171<br><b>βPro 173</b> (βI)<br><b>βSer 174</b> (βI)<br>βVal 177<br><b>βSer 178</b> (βI)<br><b>βGlu 183</b> (βI)<br>βAsn 206<br>βLeu 209<br>βTyr 224<br>βLeu 227<br>βAsn 228<br>βVal 231 | 223.4                                            | 87                              | Occupied with GDP                                                                                    |
| βII              | 736.5                                         | βS1<br>βH1<br>βS2<br>βT2<br>βS4<br>βT4<br>βH4        | βAla 9<br>βGly 10<br><b>βGln 11</b> (β-ns)<br><b>βCys 12</b> (β-ns)<br>βGly 13<br>βAsp 69<br>βGlu 71<br>βGly 98<br>βAla 99<br>βGly 100<br>βAsn 101<br><b>βSer 140</b> (β-ns)<br>βGly 143<br>βGly 144<br>βThr 145                                                                                                     | 201.4                                            | 99                              | γ-phosphate site of the guanosine nucleotide                                                         |

|             |       |                                                                                                                                              |                                                                                                                                                                                                                                                                                                                                                                                                                                                                                                                                                                                                                     |       |     |                                                                  |
|-------------|-------|----------------------------------------------------------------------------------------------------------------------------------------------|---------------------------------------------------------------------------------------------------------------------------------------------------------------------------------------------------------------------------------------------------------------------------------------------------------------------------------------------------------------------------------------------------------------------------------------------------------------------------------------------------------------------------------------------------------------------------------------------------------------------|-------|-----|------------------------------------------------------------------|
|             |       |                                                                                                                                              | $\beta$ Gly 146                                                                                                                                                                                                                                                                                                                                                                                                                                                                                                                                                                                                     |       |     |                                                                  |
| $\beta$ III | 757.9 | $\beta$ S4<br>$\beta$ S5<br>$\beta$ H5-S6<br>$\beta$ S6<br>$\beta$ H7<br>$\beta$ T7<br>$\beta$ H8<br>$\beta$ S7<br>$\beta$ S8<br>$\beta$ S10 | $\beta$ Gln 136<br>$\beta$ Ile 165<br>$\beta$ Asn 167<br>$\beta$ Phe 169<br>$\beta$ Asp 199<br>$\beta$ Glu 200<br>$\beta$ Tyr 202<br>$\beta$ Gly 237<br>$\beta$ Val 238<br>$\beta$ Thr 239<br>$\beta$ Thr 240<br>$\beta$ Cys 241<br>$\beta$ Leu 242<br><b><math>\beta</math>Leu 248</b> ( $\beta$ IV)<br>$\beta$ Asn 249<br>$\beta$ Asp 251<br>$\beta$ Leu 252<br><b><math>\beta</math>Leu 255</b> ( $\beta$ IV)<br>$\beta$ Ala 256<br><b><math>\beta</math>Met 259</b> ( $\beta$ IV)<br>$\beta$ Val 260<br>$\beta$ Phe 268<br><b><math>\beta</math>Ala 316</b> ( $\beta$ IV)<br>$\beta$ Ile 318<br>$\beta$ Ile 378 | 302.1 | 100 | Part of the colchicine site                                      |
| $\beta$ IV  | 588.6 | $\beta$ T7<br>$\beta$ H8<br>$\beta$ S8<br>$\beta$ H10-S9<br>$\beta$ S9                                                                       | <b><math>\beta</math>Leu 248</b> ( $\beta$ III)<br><b><math>\beta</math>Leu 255</b> ( $\beta$ III)<br>$\beta$ Asn 258<br><b><math>\beta</math>Met 259</b> ( $\beta$ III)<br>$\beta$ Thr 314<br>$\beta$ Val 315<br><b><math>\beta</math>Ala 316</b> ( $\beta$ III)<br>$\beta$ Ile 347<br>$\beta$ Pro 348<br>$\beta$ Asn 349<br>$\beta$ Asn 350<br>$\beta$ Val 351<br>$\beta$ Lys 352                                                                                                                                                                                                                                 | 137.0 | 70  | Part of the colchicine site<br><br>Equivalent to pID $\alpha$ VI |
| $\beta$ V   | 912.8 | $\beta$ H1<br>$\beta$ S7<br>$\beta$ M<br>$\beta$ S8<br>$\beta$ S9-S10<br>$\beta$ S10                                                         | <b><math>\beta</math>Lys 19</b> ( $\beta$ VI)<br>$\beta$ Val 23<br>$\beta$ Gly 225<br>$\beta$ Asn 228<br>$\beta$ His 229<br>$\beta$ Leu 230<br>$\beta$ Ser 232<br>$\beta$ Ala 233<br>$\beta$ Ser 236<br>$\beta$ Gly 237<br>$\beta$ Phe 272<br><b><math>\beta</math>Pro 274</b> ( $\beta$ XI)<br>$\beta$ Leu 275<br><b><math>\beta</math>Thr 276</b> ( $\beta$ XI)                                                                                                                                                                                                                                                   | 324.7 | 98  | Part of the taxane site                                          |

|              |       |                                                                                                                   |                                                                                                                                                                                                                                                                                                                                                                                                                                                                                                                   |       |    |                                                                                                                                                       |
|--------------|-------|-------------------------------------------------------------------------------------------------------------------|-------------------------------------------------------------------------------------------------------------------------------------------------------------------------------------------------------------------------------------------------------------------------------------------------------------------------------------------------------------------------------------------------------------------------------------------------------------------------------------------------------------------|-------|----|-------------------------------------------------------------------------------------------------------------------------------------------------------|
|              |       |                                                                                                                   | <p> <math>\beta</math>Ser 277<br/> <math>\beta</math>Arg 278<br/> <math>\beta</math>Gly 279<br/> <math>\beta</math>Ser 280<br/> <b><math>\beta</math>Gln 281</b> (<math>\beta</math>XI)<br/> <math>\beta</math>Gln 282<br/> <math>\beta</math>Tyr 283<br/> <math>\beta</math>Arg 320<br/> <math>\beta</math>Pro 360<br/> <math>\beta</math>Arg 369<br/> <math>\beta</math>Gly 370<br/> <b><math>\beta</math>Leu 371</b> (<math>\beta</math>XI)<br/> <math>\beta</math>Ser 374<br/> <math>\beta</math>Thr 376 </p> |       |    |                                                                                                                                                       |
| $\beta$ VI   | 633.3 | <p> <math>\beta</math>H1<br/> <math>\beta</math>H2<br/> <math>\beta</math>H2-S3 </p>                              | <p> <b><math>\beta</math>Gln 15</b> (<math>\beta</math>-ns)<br/> <math>\beta</math>Ala 18<br/> <b><math>\beta</math>Lys 19</b> (<math>\beta</math>V)<br/> <math>\beta</math>Glu 22<br/> <math>\beta</math>Ser 77<br/> <math>\beta</math>Val 78<br/> <math>\beta</math>Ser 80<br/> <math>\beta</math>Pro 82<br/> <math>\beta</math>Phe 83<br/> <math>\beta</math>Gly 84 </p>                                                                                                                                       | 98.8  | 52 | <p>Unknown pocket</p> <p>Mediating communication between <math>\beta</math>-ns and the taxane site</p> <p>Equivalent to pID <math>\alpha</math>IV</p> |
| $\beta$ VII  | 230.0 | <p> <math>\beta</math>H3<br/> <math>\beta</math>H5<br/> <math>\beta</math>H11-H12<br/> <math>\beta</math>H12 </p> | <p> <math>\beta</math>Trp 103<br/> <math>\beta</math>Tyr 108<br/> <math>\beta</math>Leu 189<br/> <math>\beta</math>His 192<br/> <math>\beta</math>Gln 193<br/> <math>\beta</math>Met 413<br/> <math>\beta</math>Glu 417<br/> <math>\beta</math>Glu 420<br/> <math>\beta</math>Ala 421 </p>                                                                                                                                                                                                                        | 83.4  | 32 | Unknown pocket                                                                                                                                        |
| $\beta$ VIII | 673.9 | <p> <math>\beta</math>H6<br/> <math>\beta</math>H9-S8 </p>                                                        | <p> <math>\beta</math>Ala 208<br/> <math>\beta</math>Asp 211<br/> <math>\beta</math>Ile 212<br/> <math>\beta</math>Arg 215<br/> <math>\beta</math>Thr 216<br/> <b><math>\beta</math>Ser 298</b> (<math>\beta</math>X)<br/> <math>\beta</math>Lys 299<br/> <b><math>\beta</math>Met 301</b> (<math>\beta</math>X)<br/> <math>\beta</math>Ala 303<br/> <math>\beta</math>Ala 304<br/> <math>\beta</math>Cys 305 </p>                                                                                                | 109.8 | 57 | Unknown pocket                                                                                                                                        |
| $\beta$ IX   | 144.1 | <p> <math>\beta</math>T2<br/> <math>\beta</math>T3<br/> <math>\beta</math>H3 </p>                                 | <p> <math>\beta</math>Leu 70<br/> <math>\beta</math>Gly 95<br/> <math>\beta</math>Gln 96<br/> <math>\beta</math>Ser 97<br/> <math>\beta</math>Glu 110<br/> <math>\beta</math>Glu 113<br/> <math>\beta</math>Leu 114 </p>                                                                                                                                                                                                                                                                                          | 78.3  | 31 | Unknown pocket                                                                                                                                        |

|            |       |                                                                        |                                                                                                                                                                                                                                                                                                                                                          |       |    |                                                                                                     |
|------------|-------|------------------------------------------------------------------------|----------------------------------------------------------------------------------------------------------------------------------------------------------------------------------------------------------------------------------------------------------------------------------------------------------------------------------------------------------|-------|----|-----------------------------------------------------------------------------------------------------|
| $\beta$ X  | 529.3 | $\beta$ S7<br>$\beta$ H9<br>$\beta$ H9-S8<br>$\beta$ S8<br>$\beta$ S10 | $\beta$ Met 269<br>$\beta$ Met 295<br>$\beta$ Phe 296<br>$\beta$ Asp 297<br><b><math>\beta</math>Ser 298</b> ( $\beta$ VIII)<br><b><math>\beta</math>Met 301</b> ( $\beta$ VIII)<br>$\beta$ Pro 307<br>$\beta$ Arg 308<br>$\beta$ Tyr 312<br>$\beta$ Phe 377                                                                                             | 123.6 | 46 | Part of the laulimalide/peloruside site<br><br>Equivalent to pID $\alpha$ XI                        |
| $\beta$ XI | 753.6 | $\beta$ M<br>$\beta$ S9-S10<br>$\beta$ S10                             | <b><math>\beta</math>Pro 274</b> ( $\beta$ V)<br><b><math>\beta</math>Thr 276</b> ( $\beta$ V)<br><b><math>\beta</math>Gln 281</b> ( $\beta$ V)<br>$\beta$ Gln 282<br>$\beta$ Tyr 283<br>$\beta$ Arg 284<br>$\beta$ Ala 285<br>$\beta$ Leu 286<br>$\beta$ Gly 370<br><b><math>\beta</math>Leu 371</b> ( $\beta$ V)<br>$\beta$ Lys 372<br>$\beta$ Met 373 | 140.3 | 41 | Part of the taxane site                                                                             |
| X1         | 441.4 | $\beta$ H9-S8<br>$\beta$ H11<br>$\beta$ H12                            | $\beta$ His 309<br>$\beta$ Gly 310<br>$\beta$ Ala 383<br>$\beta$ Gln 385<br>$\beta$ Glu 386<br>$\beta$ Gln 436<br>$\beta$ Thr 439                                                                                                                                                                                                                        | 113.2 | 31 | Most likely an artifact as it involves the actual C-terminus of the used $\beta$ -tubulin structure |

### $\alpha$ -Tubulin

| pID <sup>1</sup> | Max. volume <sup>2</sup><br>( $\text{\AA}^3$ ) | SS <sup>3</sup>                                                                                           | ResID <sup>4</sup><br>( $p > 20\%$ )                                                                                                                                                                                                                                                                                                                                                                                                                                                                                                                                                                                                                                                                                               | Average Volume <sup>5</sup><br>( $\text{\AA}^3$ ) | Persistency <sup>6</sup><br>(%) | Note <sup>7</sup>                                                                    |
|------------------|------------------------------------------------|-----------------------------------------------------------------------------------------------------------|------------------------------------------------------------------------------------------------------------------------------------------------------------------------------------------------------------------------------------------------------------------------------------------------------------------------------------------------------------------------------------------------------------------------------------------------------------------------------------------------------------------------------------------------------------------------------------------------------------------------------------------------------------------------------------------------------------------------------------|---------------------------------------------------|---------------------------------|--------------------------------------------------------------------------------------|
| $\alpha$ I       | 936.0                                          | $\alpha$ S5<br>$\alpha$ T5<br>$\alpha$ H5<br>$\alpha$ S6<br>$\alpha$ H6<br>$\alpha$ H9-S8<br>$\alpha$ H11 | <b><math>\alpha</math>Tyr 172</b> ( $\alpha$ -ns)<br><b><math>\alpha</math>Pro 173</b> ( $\alpha$ -ns)<br><b><math>\alpha</math>Ala 174</b> ( $\alpha$ -ns)<br>$\alpha$ Pro 175<br><b><math>\alpha</math>Ser 178</b> ( $\alpha$ -ns)<br><b><math>\alpha</math>Ala 180</b> ( $\alpha$ -ns)<br><b><math>\alpha</math>Val 181</b> ( $\alpha$ -ns)<br>$\alpha$ Glu 183<br>$\alpha$ Pro 184<br>$\alpha$ Ser 187<br><b><math>\alpha</math>Asp 205</b> ( $\alpha$ II)<br><b><math>\alpha</math>Glu 207</b> ( $\alpha$ II)<br><b><math>\alpha</math>Lys 304</b> ( $\alpha$ II)<br><b><math>\alpha</math>Cys 305</b> ( $\alpha$ II)<br><b><math>\alpha</math>Ala 387</b> ( $\alpha$ II)<br><b><math>\alpha</math>Arg 390</b> ( $\alpha$ II) | 246.6                                             | 86                              | Unknown pocket<br><br>Equivalent to pID $\beta$ I<br><br>Merges with pID $\alpha$ II |

|      |        |                                                                                         |                                                                                                                                                                                                                                                                                                                                                                                                                                                                                                                                       |       |     |                    |
|------|--------|-----------------------------------------------------------------------------------------|---------------------------------------------------------------------------------------------------------------------------------------------------------------------------------------------------------------------------------------------------------------------------------------------------------------------------------------------------------------------------------------------------------------------------------------------------------------------------------------------------------------------------------------|-------|-----|--------------------|
|      |        |                                                                                         | <b>αLeu 391</b> (αII)<br><b>αLys 394</b> (αII)<br>αLeu 397<br>αMet 398                                                                                                                                                                                                                                                                                                                                                                                                                                                                |       |     |                    |
| α-ns | 1020.4 | αH1<br>αS2<br>αT2<br>αH2<br>αT3<br>αS4<br>αT4<br>αH4<br>αS5<br>αT5<br>αH5<br>αH6<br>αH7 | αGly 10<br>αGln 11<br>αAla 12<br><b>αGln 15</b> (αIV)<br>αIle 16<br>αAsp 69<br>αGlu 71<br>αThr 73<br>αVal 74<br>αAsp 98<br>αAla 99<br>αAla 100<br>αAsn 101<br>αSer 140<br><b>αPhe 141</b> (αII)<br>αGly 142<br>αGly 143<br>αGly 144<br>αThr 145<br>αGly 146<br>αIle 171<br><b>αTyr 172</b> (αI)<br><b>αPro 173</b> (αI)<br><b>αAla 174</b> (αI)<br>αVal 177<br><b>αSer 178</b> (αI)<br>αThr 179<br><b>αAla 180</b> (αI)<br><b>αGlu 183</b> (αI)<br>αAsn 206<br><b>αTyr 224</b> (αIV)<br>αLeu 227<br><b>αAsn 228</b> (αIV)<br>αIle 231 | 519.6 | 100 | Occupied with GTP  |
| αII  | 945.1  | αT4<br>αS5<br>αS6<br>αH6<br>αH8-S7<br>αS7<br>αH9-S8<br>αS10-<br>H11<br>αH11             | <b>αPhe 141</b> (α-ns)<br>αTyr 172<br>αMet 203<br>αVal 204<br><b>αAsp 205</b> (αI)<br><b>αGlu 207</b> (αI)<br><b>αPhe 267</b> (αIII)<br>αPro 268<br><b>αLeu 269</b> (αXI)<br><b>αAla 270</b> (αXI)<br><b>αVal 303</b> (αXI)<br><b>αLys 304</b> (αI)<br><b>αCys 305</b> (αI)<br>αAsp 306<br><b>αPro 307</b> (αXI)                                                                                                                                                                                                                      | 327.7 | 77  | Merges with pID αI |

|              |       |                                                                                |                                                                                                                                                                                                                                                                                                                                                                                                                         |       |    |                                                                                           |
|--------------|-------|--------------------------------------------------------------------------------|-------------------------------------------------------------------------------------------------------------------------------------------------------------------------------------------------------------------------------------------------------------------------------------------------------------------------------------------------------------------------------------------------------------------------|-------|----|-------------------------------------------------------------------------------------------|
|              |       |                                                                                | $\alpha$ His 309<br>$\alpha$ Ala 383<br>$\alpha$ Ile 384<br>$\alpha$ Glu 386<br><b><math>\alpha</math>Ala 387</b> ( $\alpha$ I)<br><b><math>\alpha</math>Trp 388</b> ( $\alpha$ III)<br><b><math>\alpha</math>Arg 390</b> ( $\alpha$ I)<br><b><math>\alpha</math>Leu 391</b> ( $\alpha$ I)<br><b><math>\alpha</math>Lys 394</b> ( $\alpha$ I)                                                                           |       |    |                                                                                           |
| $\alpha$ III | 924.9 | $\alpha$ H5<br>$\alpha$ H8-S7<br>$\alpha$ H11                                  | $\alpha$ Thr 191<br>$\alpha$ His 192<br>$\alpha$ Leu 195<br>$\alpha$ Glu 196<br>$\alpha$ Pro 263<br>$\alpha$ Arg 264<br>$\alpha$ His 266<br><b><math>\alpha</math>Phe 267</b> ( $\alpha$ II)<br><b><math>\alpha</math>Trp 388</b> ( $\alpha$ II)<br>$\alpha$ Asp 424<br>$\alpha$ Leu 428<br>$\alpha$ Tyr 432                                                                                                            | 125.3 | 62 | Unknown pocket                                                                            |
| $\alpha$ IV  | 541.4 | $\alpha$ H1<br>$\alpha$ H2<br>$\alpha$ H2-S3<br>$\alpha$ H7                    | <b><math>\alpha</math>Gln 15</b> ( $\alpha$ -ns)<br>$\alpha$ Asn 18<br>$\alpha$ Ala 19<br><b><math>\alpha</math>Glu 22</b> ( $\alpha$ X)<br>$\alpha$ Glu 77<br>$\alpha$ Val 78<br>$\alpha$ Thr 82<br><b><math>\alpha</math>Tyr 83</b> ( $\alpha$ X)<br><b><math>\alpha</math>Tyr 224</b> ( $\alpha$ -ns)<br><b><math>\alpha</math>Thr 225</b> ( $\alpha$ -ns)<br>$\alpha$ Asn 228<br>$\alpha$ Arg 229                   | 148.2 | 69 | Unknown pocket<br><br>Equivalent to pID $\beta$ VI<br><br>Communication with $\alpha$ -ns |
| $\alpha$ V   | 649.6 | $\alpha$ M<br>$\alpha$ S9-S10<br>$\alpha$ S10                                  | <b><math>\alpha</math>Pro 274</b> ( $\alpha$ IX)<br><b><math>\alpha</math>Ile 276</b> ( $\alpha$ XII)<br>$\alpha$ Lys 280<br>$\alpha$ Ala 281<br>$\alpha$ Tyr 282<br>$\alpha$ His 283<br>$\alpha$ Glu 284<br>$\alpha$ Gln 285<br>$\alpha$ Leu 286<br><b><math>\alpha</math>Ala 369</b> ( $\alpha$ XII)<br>$\alpha$ Lys 370<br><b><math>\alpha</math>Val 371</b> ( $\alpha$ XII)<br>$\alpha$ Gln 372<br>$\alpha$ Arg 373 | 136.6 | 51 | Unknown pocket<br><br>Communicates with pID $\alpha$ XII                                  |
| $\alpha$ VI  | 496.7 | $\alpha$ H8<br>$\alpha$ H8-S7<br>$\alpha$ S8<br>$\alpha$ H10-S9<br>$\alpha$ S9 | $\alpha$ Asn 258<br>$\alpha$ Pro 261<br>$\alpha$ Met 313<br>$\alpha$ Ala 314<br>$\alpha$ Cys 315                                                                                                                                                                                                                                                                                                                        | 115.4 | 52 | Unknown pocket<br><br>Equivalent to pID $\beta$ IV                                        |

|               |       |                                                                                 |                                                                                                                                                                                                                                                                                           |       |    |                                               |
|---------------|-------|---------------------------------------------------------------------------------|-------------------------------------------------------------------------------------------------------------------------------------------------------------------------------------------------------------------------------------------------------------------------------------------|-------|----|-----------------------------------------------|
|               |       |                                                                                 | $\alpha$ Phe 343<br>$\alpha$ Cys 347<br>$\alpha$ Pro 348<br>$\alpha$ Gly 350<br>$\alpha$ Phe 351<br>$\alpha$ Lys 352                                                                                                                                                                      |       |    |                                               |
| $\alpha$ VII  | 507.0 | $\alpha$ H1-S2<br>$\alpha$ H2-S3<br>$\alpha$ H3                                 | $\alpha$ Ser 54<br>$\alpha$ Glu 55<br>$\alpha$ Thr 56<br>$\alpha$ Val 62<br>$\alpha$ Pro 63<br>$\alpha$ Arg 64<br>$\alpha$ His 88<br>$\alpha$ Glu 90<br>$\alpha$ Gln 91<br>$\alpha$ Arg 121<br>$\alpha$ Lys 124<br>$\alpha$ Leu 125<br>$\alpha$ Gln 128                                   | 154.2 | 85 | Unknown pocket                                |
| $\alpha$ VIII | 744.8 | $\alpha$ H1<br>$\alpha$ H1-H1'<br>$\alpha$ H7<br>$\alpha$ S8<br>$\alpha$ S9-S10 | <b><math>\alpha</math>Leu 26</b> ( $\alpha$ X)<br>$\alpha$ Glu 27<br>$\alpha$ Thr 41<br>$\alpha$ Ile 42<br>$\alpha$ Gly 43<br>$\alpha$ Gly 44<br>$\alpha$ Phe 244<br>$\alpha$ Arg 320<br>$\alpha$ Gln 358<br>$\alpha$ Pro 359<br>$\alpha$ Pro 360<br>$\alpha$ Thr 361<br>$\alpha$ Lys 370 | 162.8 | 51 | Unknown pocket                                |
| $\alpha$ IX   | 439.8 | $\alpha$ H6<br>$\alpha$ S7<br>$\alpha$ M<br>$\alpha$ H9<br>$\alpha$ H9-S8       | $\alpha$ Ile 212<br>$\alpha$ Asn 216<br>$\alpha$ Tyr 272<br>$\alpha$ Ala 273<br><b><math>\alpha</math>Pro 274</b> ( $\alpha$ V)<br>$\alpha$ Val 275<br>$\alpha$ Ala 294<br>$\alpha$ Asn 300                                                                                               | 100.9 | 30 | Unknown pocket                                |
| $\alpha$ X    | 508.9 | $\alpha$ H1<br>$\alpha$ H1-H1'<br>$\alpha$ H2-S3<br>$\alpha$ S9-S10             | <b><math>\alpha</math>Glu 22</b> ( $\alpha$ IV)<br>$\alpha$ Cys 25<br><b><math>\alpha</math>Leu 26</b> ( $\alpha$ VIII)<br>$\alpha$ Ile 30<br>$\alpha$ Gln 31<br>$\alpha$ Pro 32<br><b><math>\alpha</math>Tyr 83</b> ( $\alpha$ IV)<br>$\alpha$ Pro 364                                   | 122.8 | 30 | Unknown pocket                                |
| $\alpha$ XI   | 689.0 | $\alpha$ S7<br>$\alpha$ H9<br>$\alpha$ H9-S8<br>$\alpha$ S8                     | <b><math>\alpha</math>Leu 269</b> ( $\alpha$ II)<br><b><math>\alpha</math>Ala 270</b> ( $\alpha$ II)<br>$\alpha$ Thr 271<br>$\alpha$ Cys 295                                                                                                                                              | 114.6 | 51 | Unknown pocket<br>Equivalent to pID $\beta$ X |

|              |       |                                                             |                                                                                                                                                                                                                                                                                                                       |      |    |                                                                                   |
|--------------|-------|-------------------------------------------------------------|-----------------------------------------------------------------------------------------------------------------------------------------------------------------------------------------------------------------------------------------------------------------------------------------------------------------------|------|----|-----------------------------------------------------------------------------------|
|              |       | $\alpha$ S10                                                | $\alpha$ Phe 296<br>$\alpha$ Gln 301<br><b><math>\alpha</math>Val 303</b> ( $\alpha$ II)<br><b><math>\alpha</math>Pro 307</b> ( $\alpha$ II)<br>$\alpha$ Arg 308<br>$\alpha$ Tyr 312<br>$\alpha$ Met 377<br>$\alpha$ Ser 379                                                                                          |      |    |                                                                                   |
| $\alpha$ XII | 392.5 | $\alpha$ H7<br>$\alpha$ S7<br>$\alpha$ M<br>$\alpha$ S9-S10 | $\alpha$ Gln 233<br>$\alpha$ Tyr 272<br>$\alpha$ Pro 274<br>$\alpha$ Val 275<br><b><math>\alpha</math>Ile 276</b> ( $\alpha$ V)<br>$\alpha$ Pro 360<br>$\alpha$ Thr 361<br>$\alpha$ Val 362<br>$\alpha$ Leu 368<br><b><math>\alpha</math>Ala 369</b> ( $\alpha$ V)<br><b><math>\alpha</math>Val 371</b> ( $\alpha$ V) | 80.0 | 32 | Unknown pocket<br>Equivalent to pID $\beta$ V<br>Communicates with pID $\alpha$ V |

<sup>1</sup>Pocket identifiers. ns, nucleotide site.

<sup>2</sup>Maximal pocket volume during the simulation.

<sup>3</sup>Secondary structural elements involved in pocket formation.

<sup>4</sup>Residues involved in pocket formation in >20 % of the time during the simulation. Residues involved in a pocket communication network are highlighted in bold; the adjacent pocket that shares the same residue is given in parenthesis.

<sup>5</sup>Average pocket volume during the simulation.

<sup>6</sup>Persistency of the pocket during the simulation.
