# Supplementary material for: Comprehensive Analysis of Binding Sites in Tubulin
Source: PubMed Central journal article supplement — Angew Chem Int Ed Engl. 2021 May 5;60(24):13331–42. doi: 10.1002/anie.202100273 (PMC8251789; doi:10.1002/anie.202100273), 2021-05-05
Supplement: ANIE-60-13331-s006.pdf [file ANIE-60-13331-s006.pdf]

Figure S1

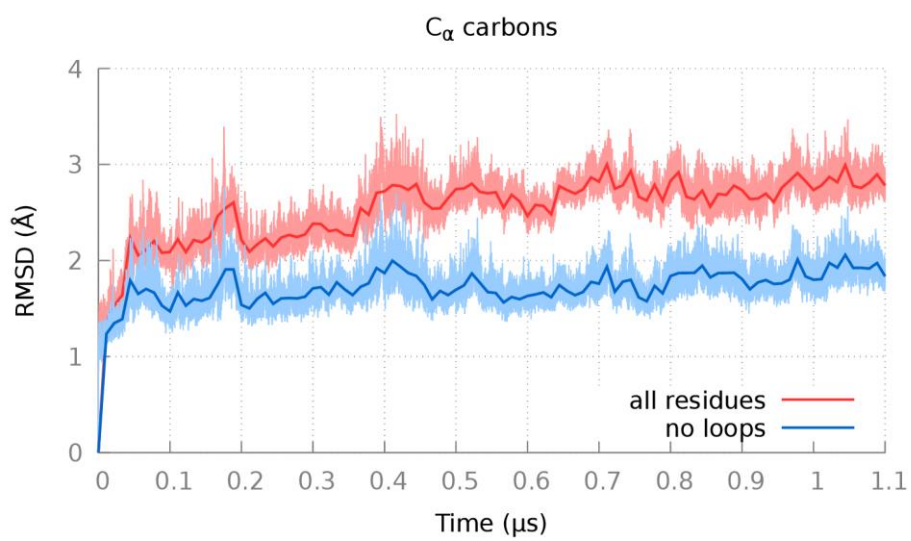

Figure S2

Fragment 01

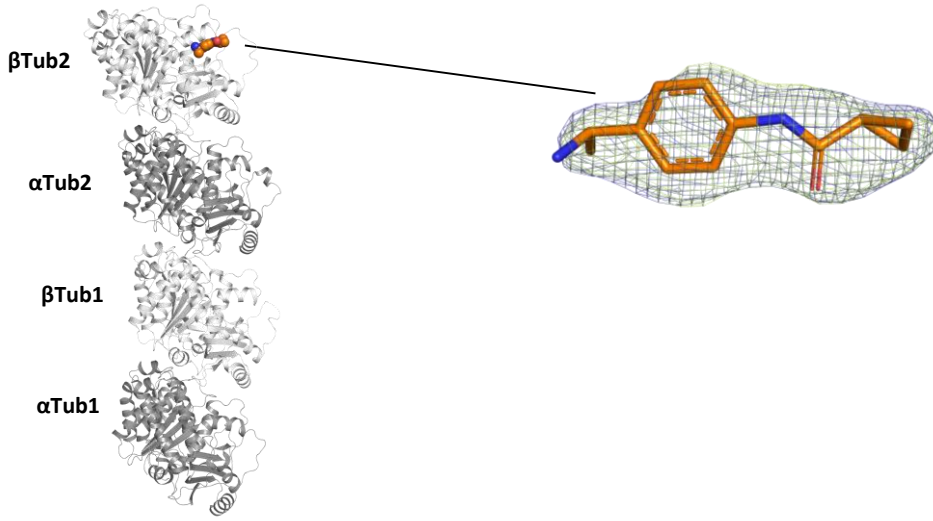

Fragment 02

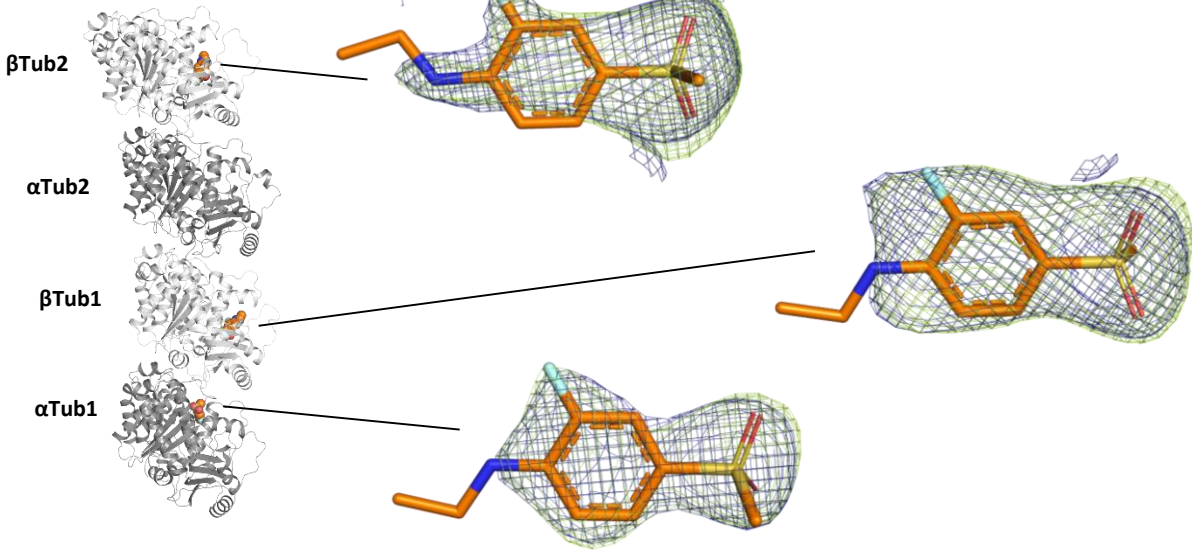

Fragment 03

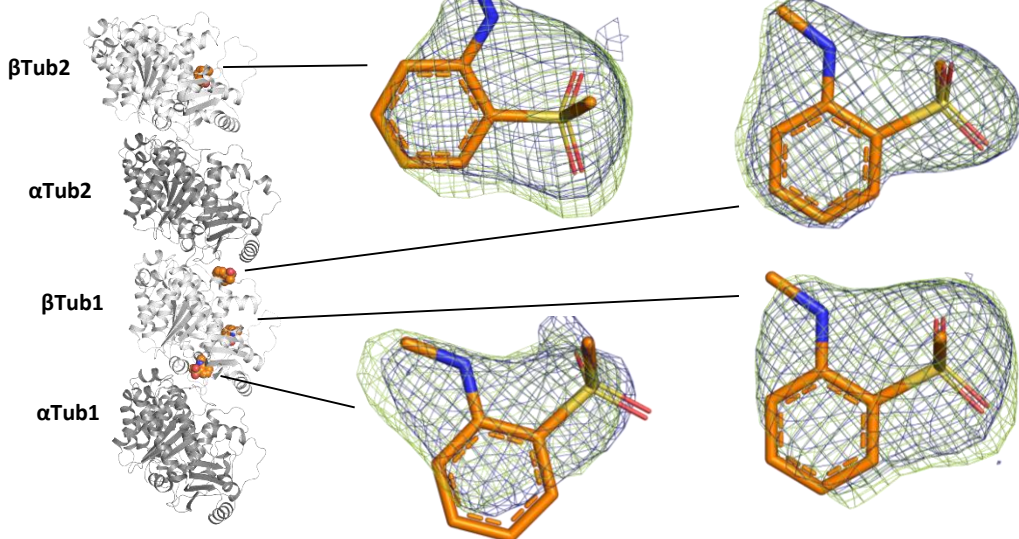

Figure S2 (continued)

Fragment 04

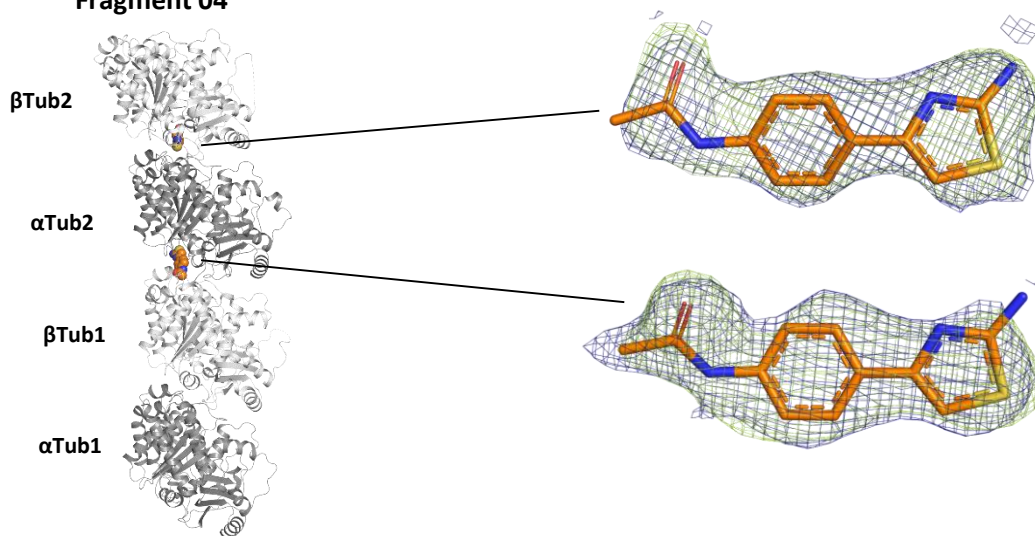

Fragment 05

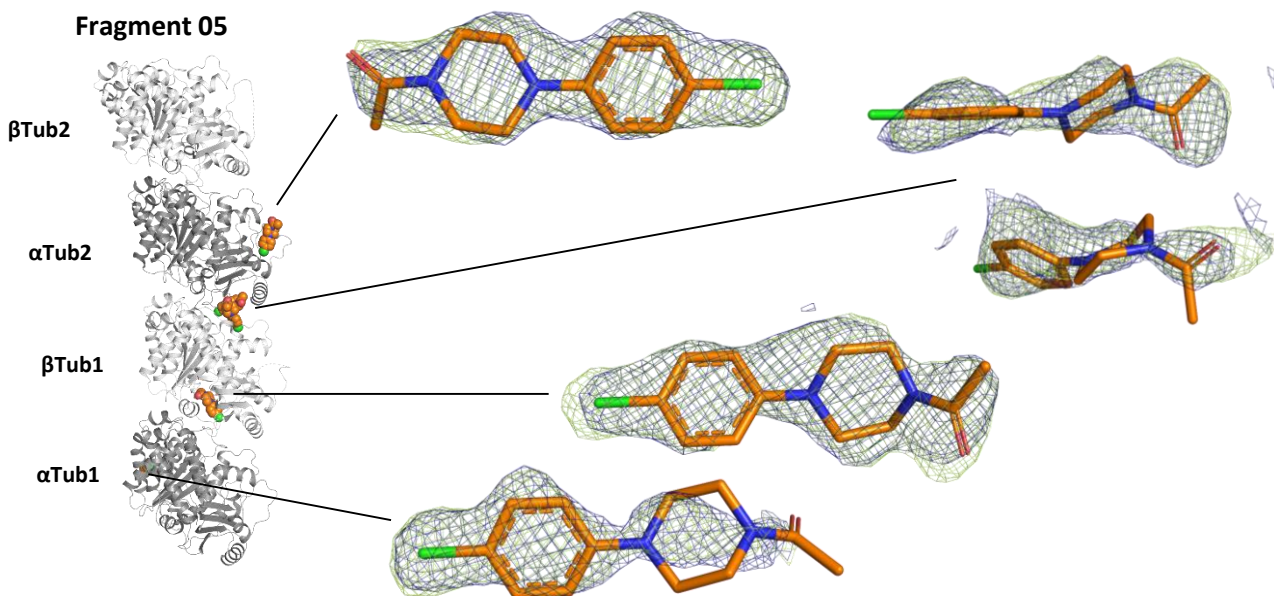

Fragment 06

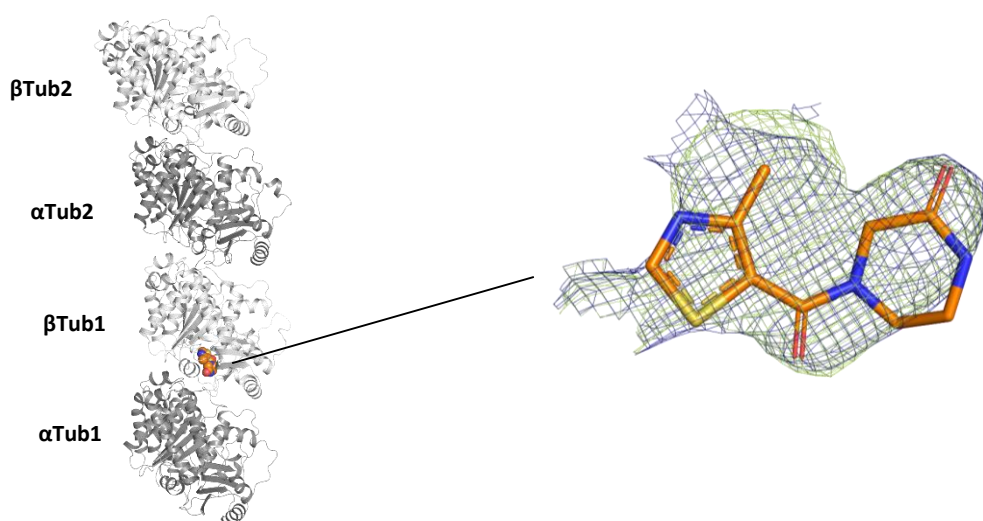

Figure S2 (continued)

Fragment 07

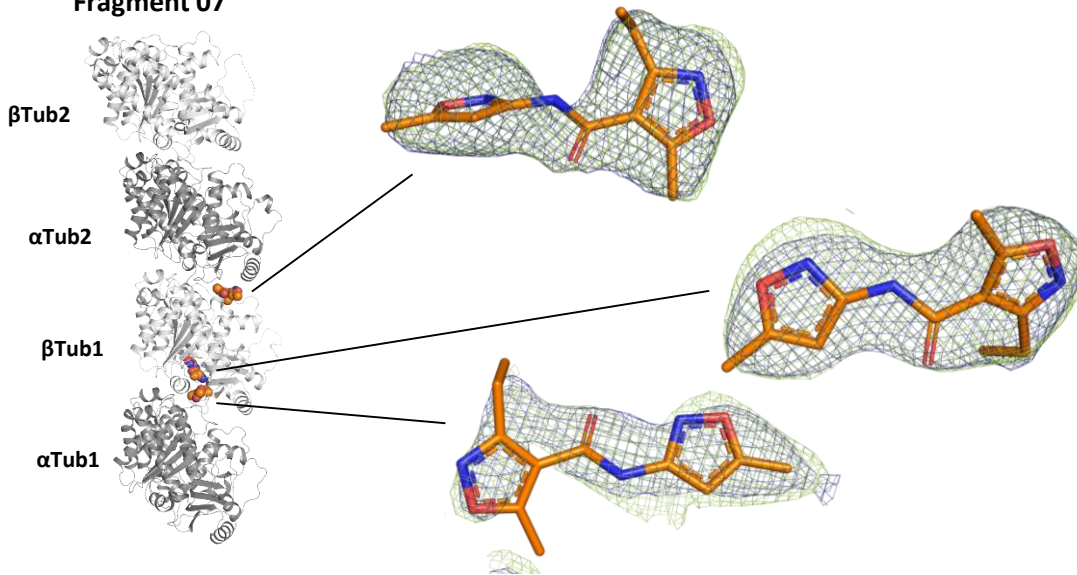

Fragment 08

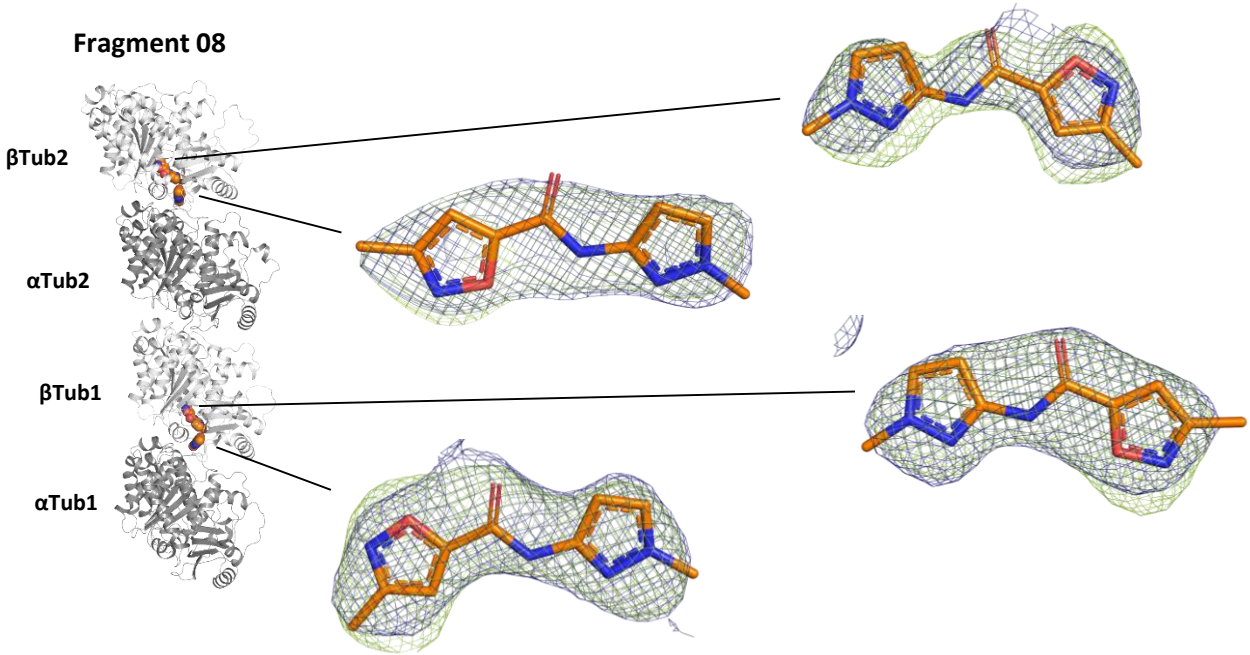

Fragment 09

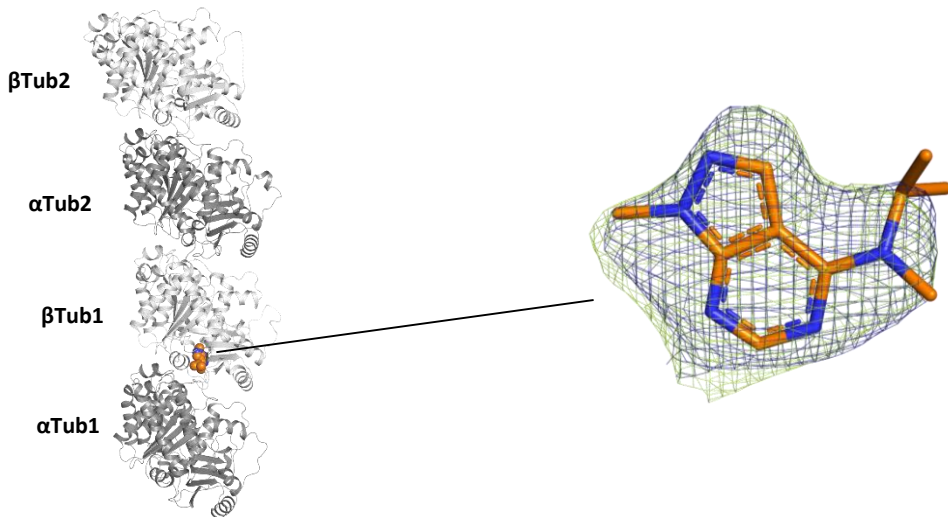

Figure S2 (continued)

Fragment 10

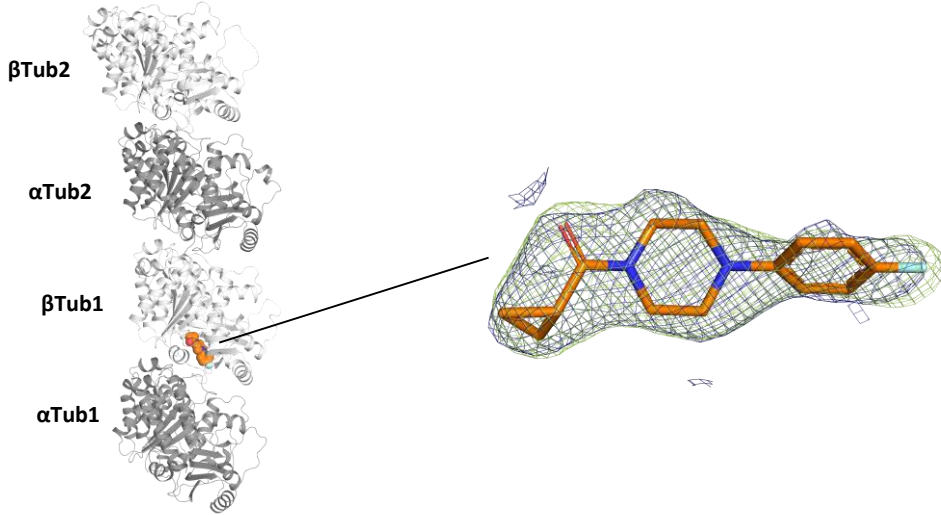

Fragment 11

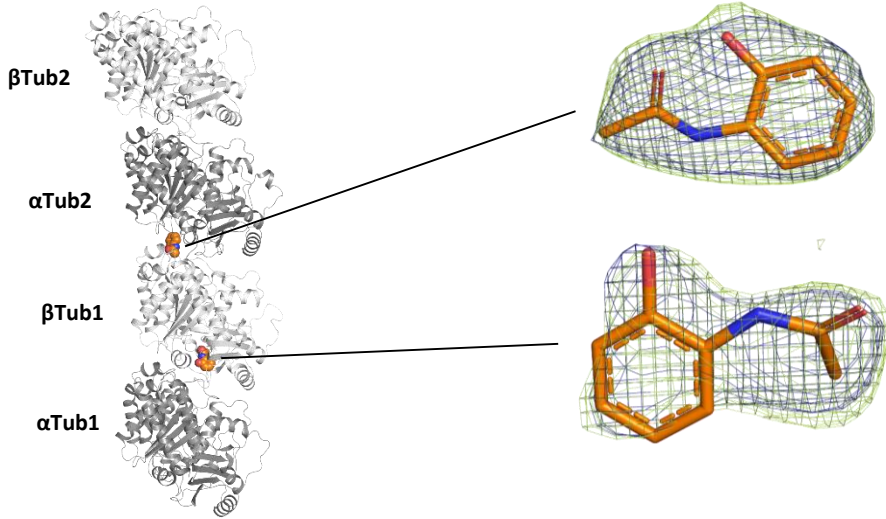

Fragment 12

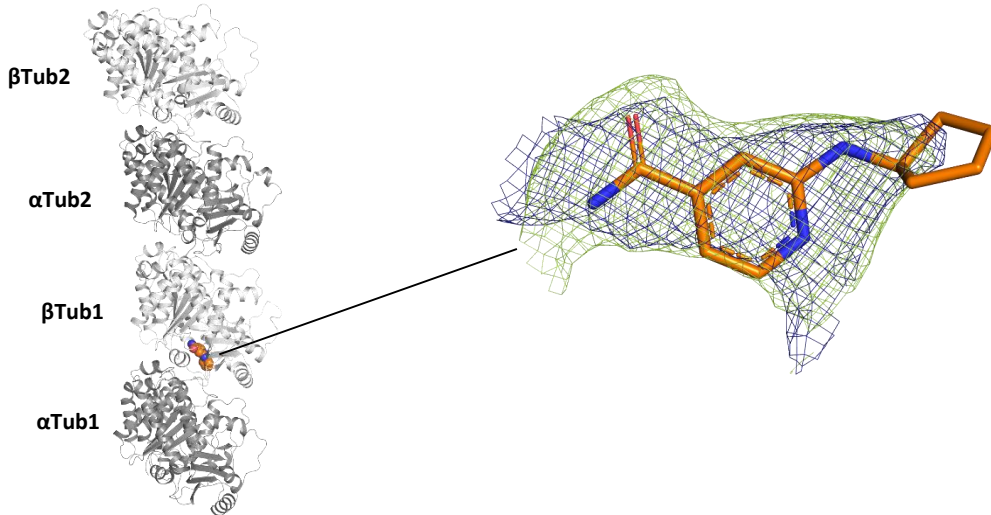

Figure S2 (continued)

Fragment 13

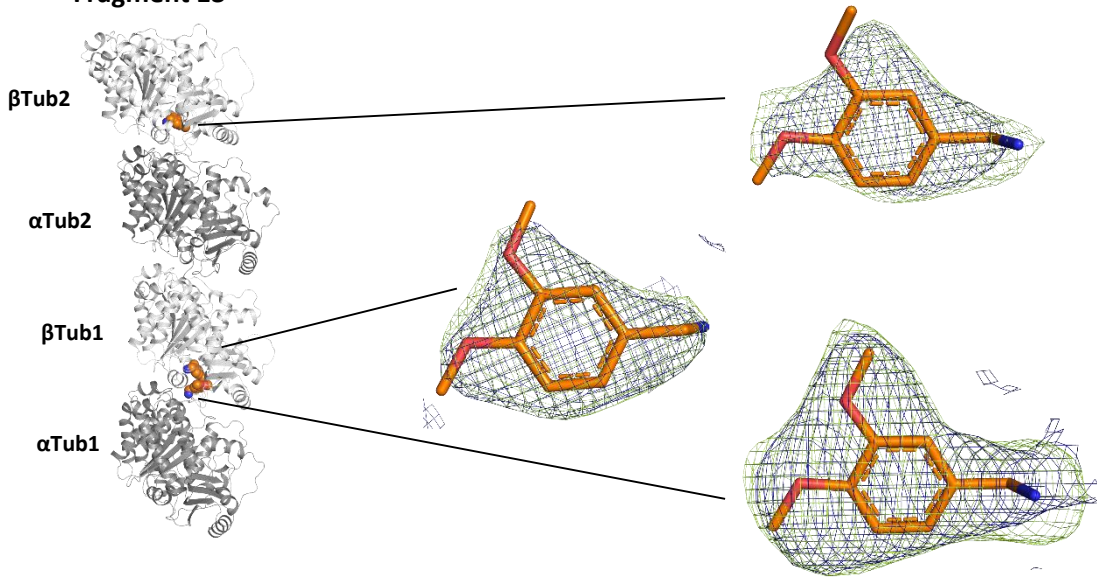

Fragment 14

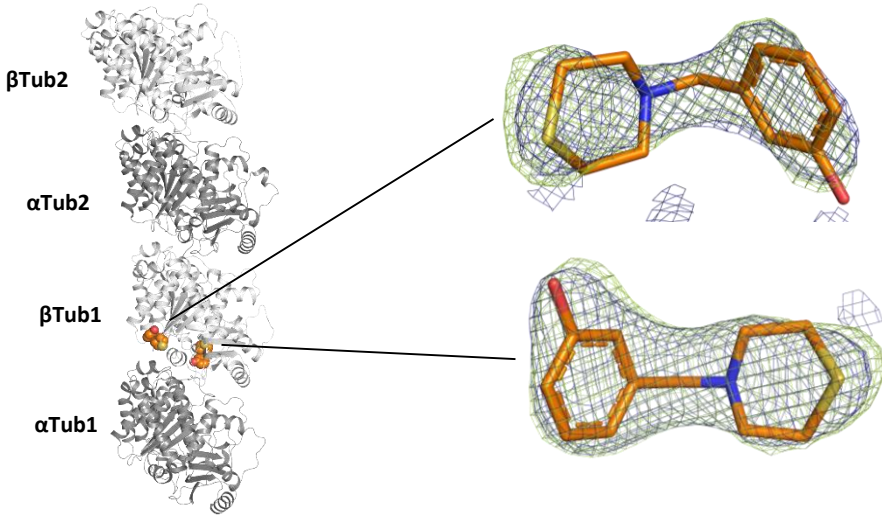

Fragment 15

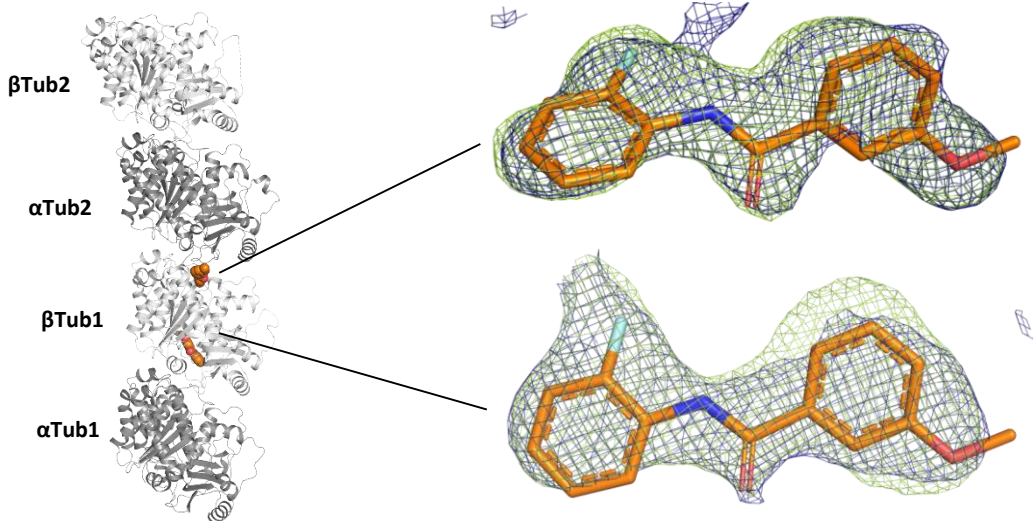

Figure S2 (continued)

Fragment 16

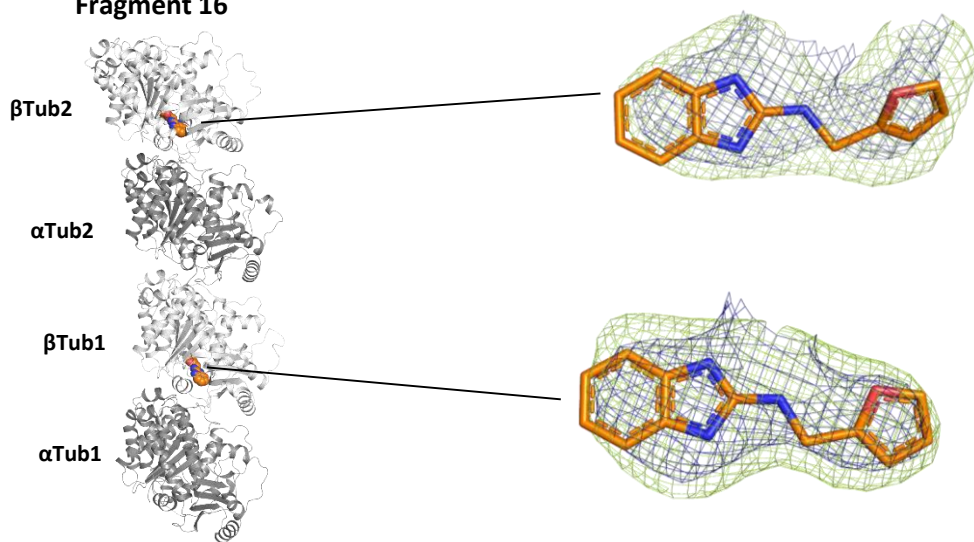

Fragment 17

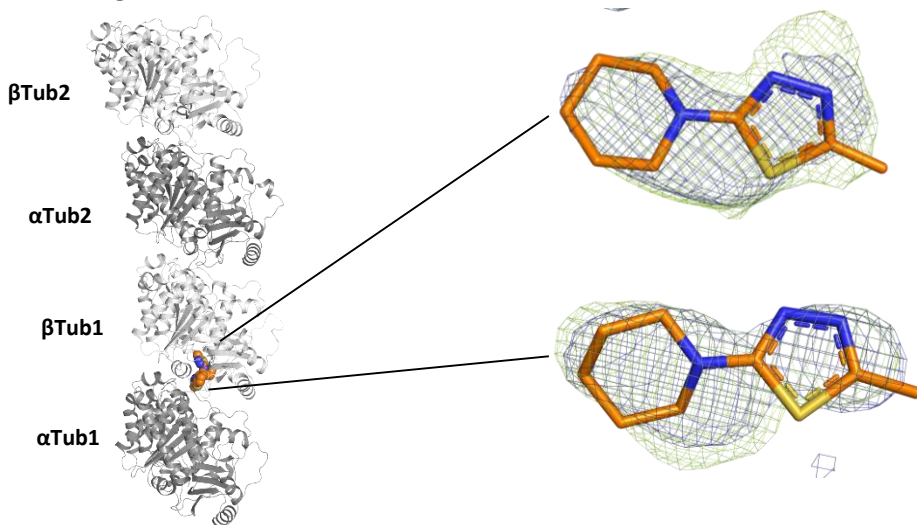

Fragment 18

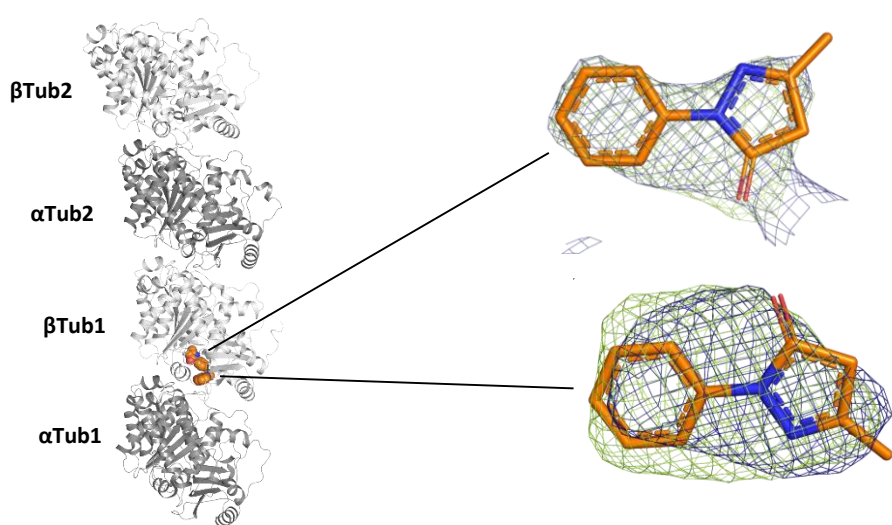

Figure S2 (continued)

Fragment 19

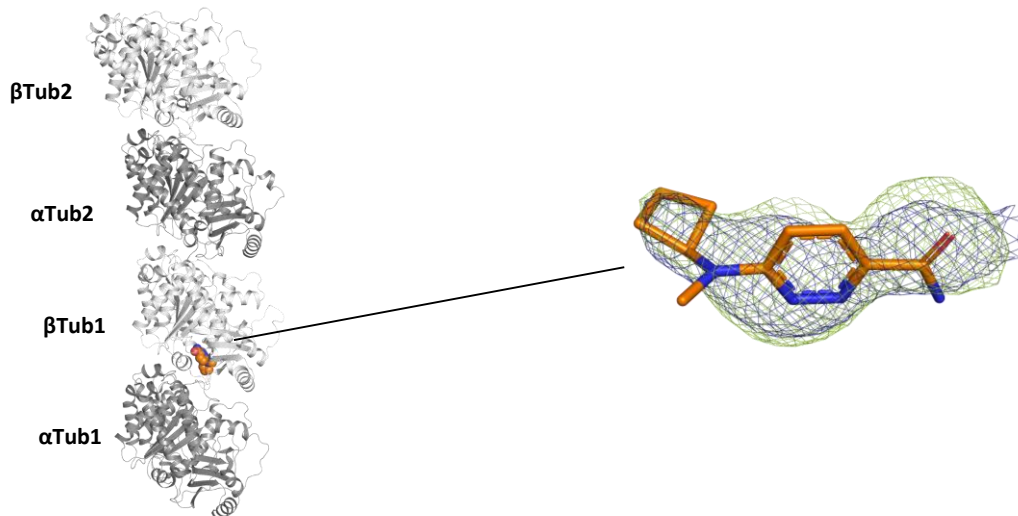

Fragment 20

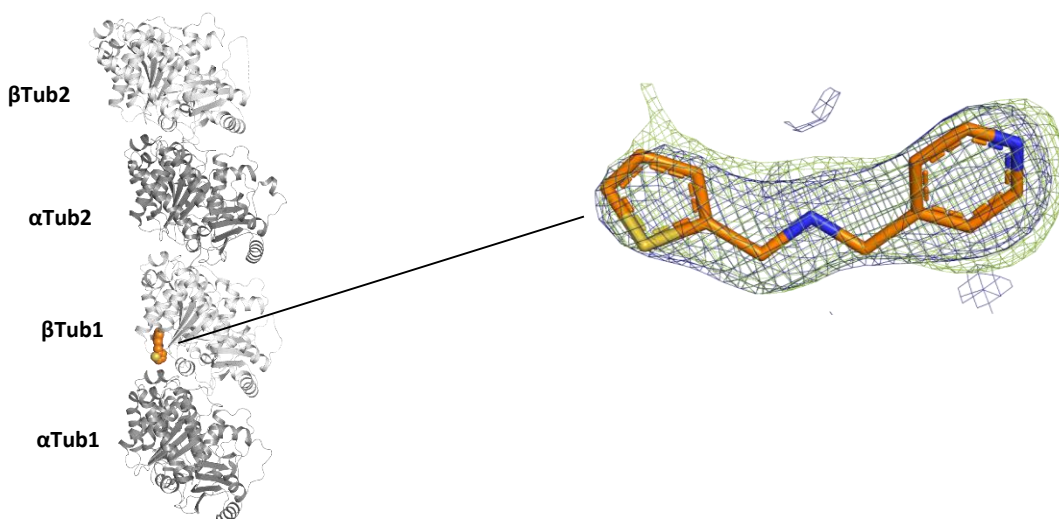

Fragment 21

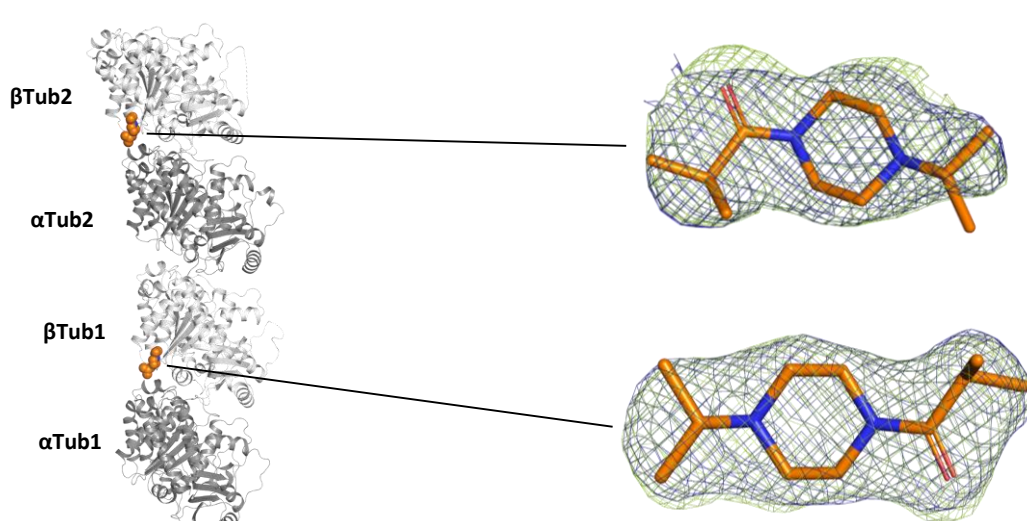



Figure S2 (continued)

Fragment 22

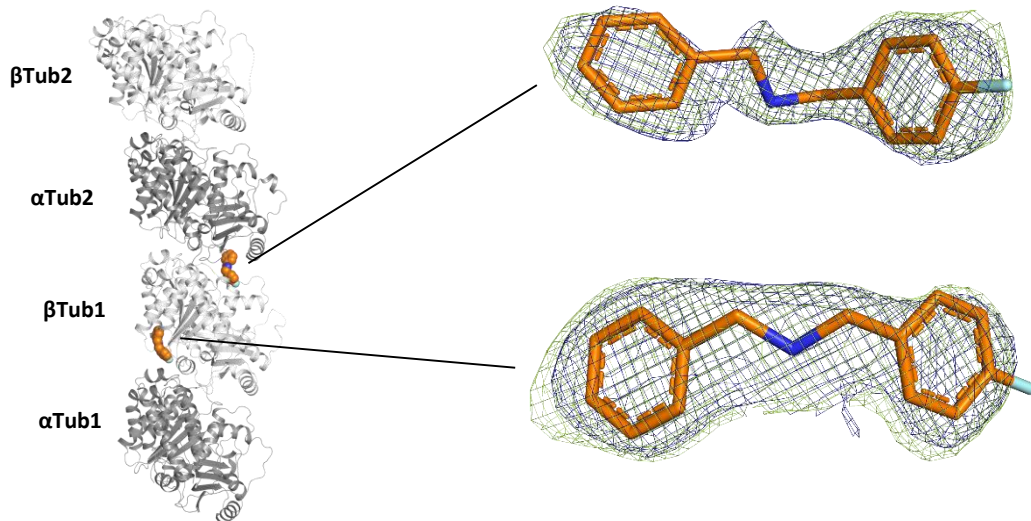

Fragment 23

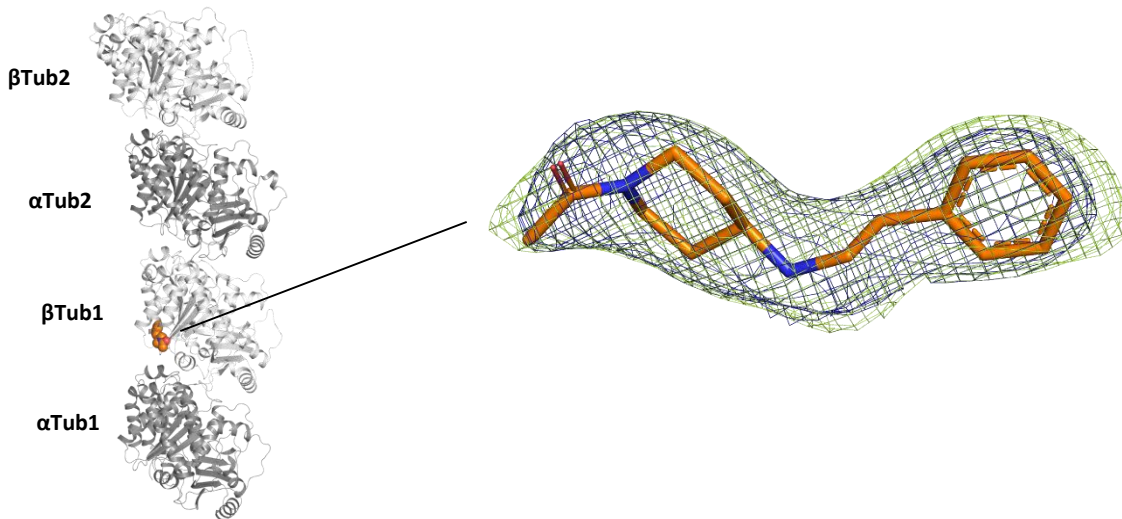

Fragment 24

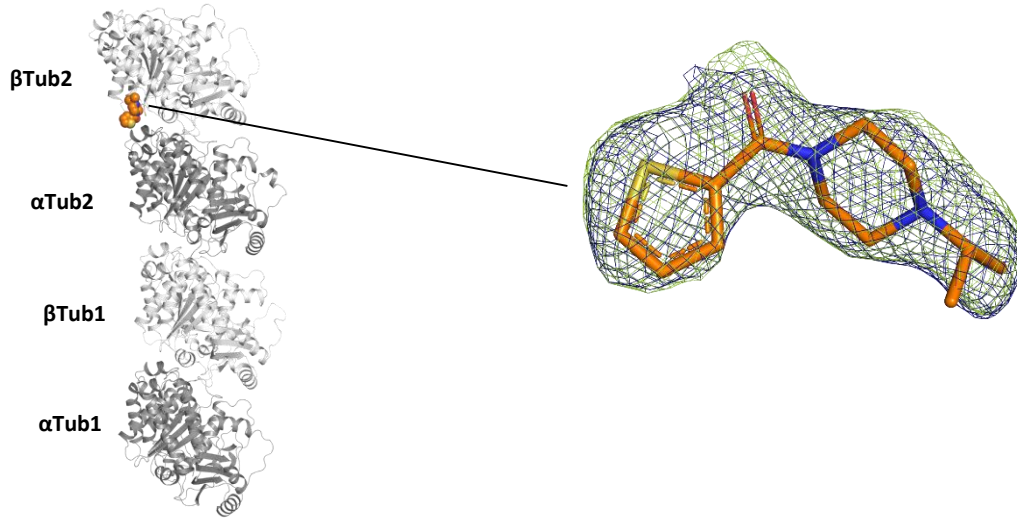

Figure S2 (continued)

Fragment 25

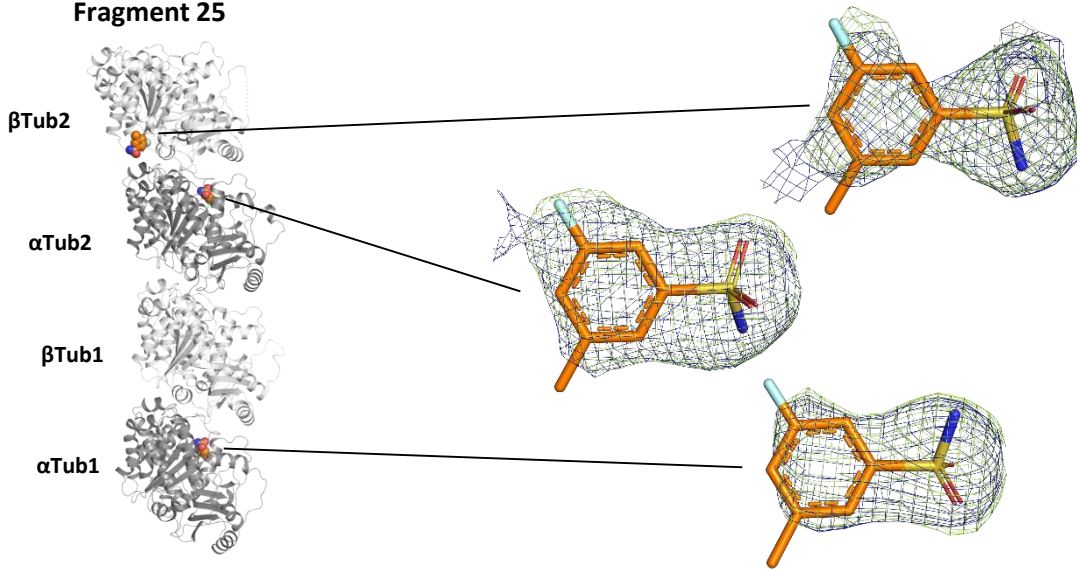

Fragment 26

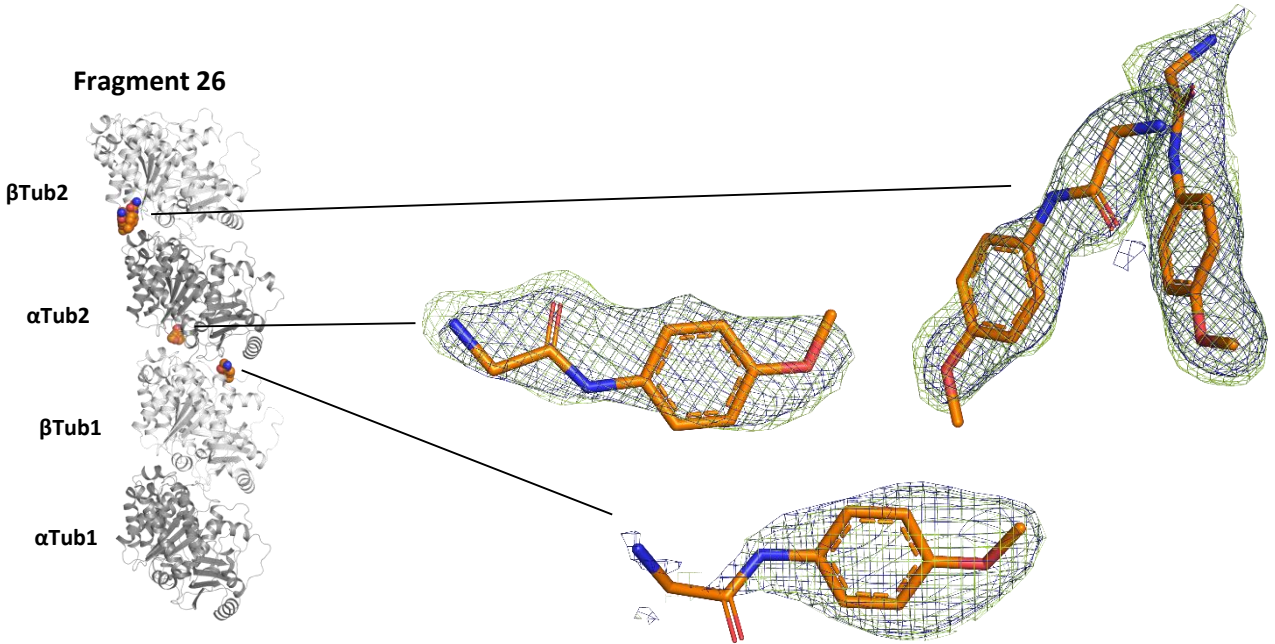

Fragment 27

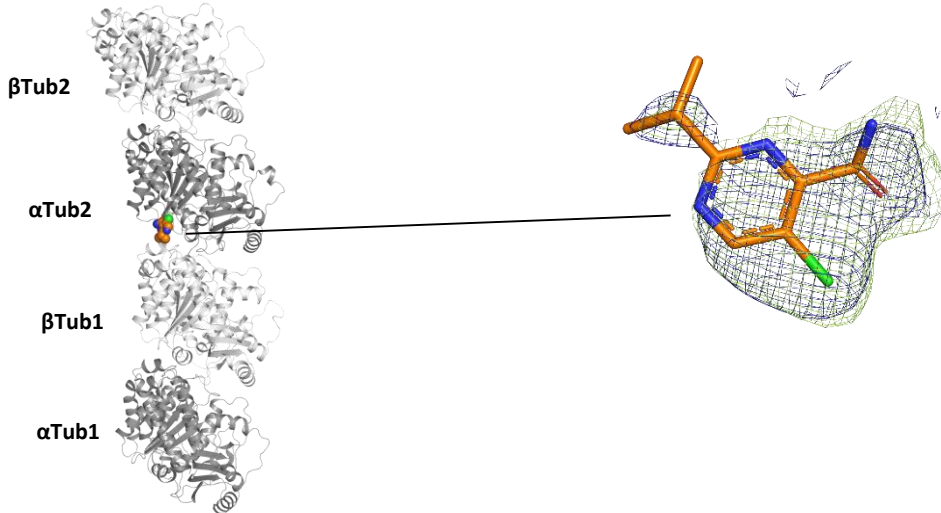

Figure S2 (continued)

Fragment 28

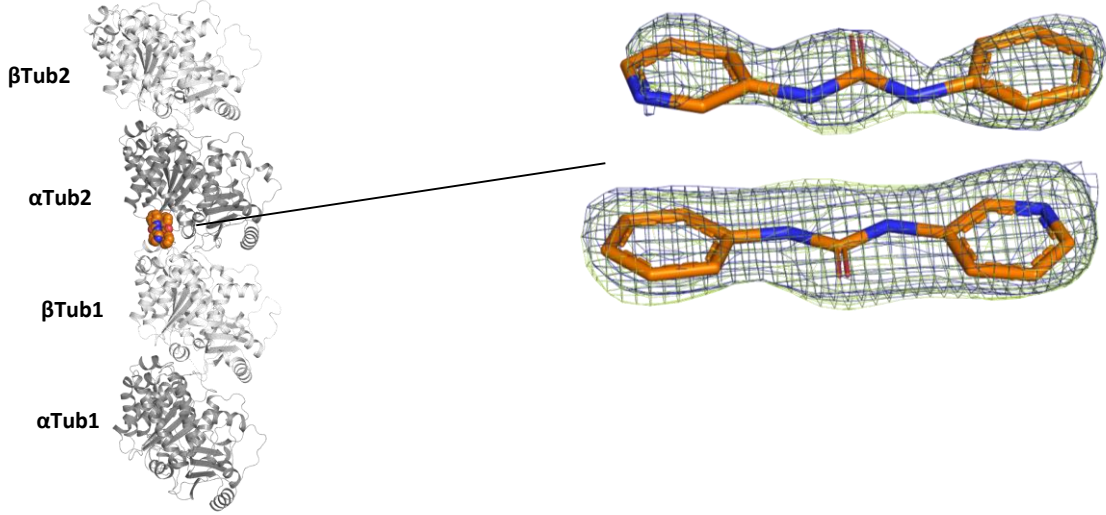

Fragment 29

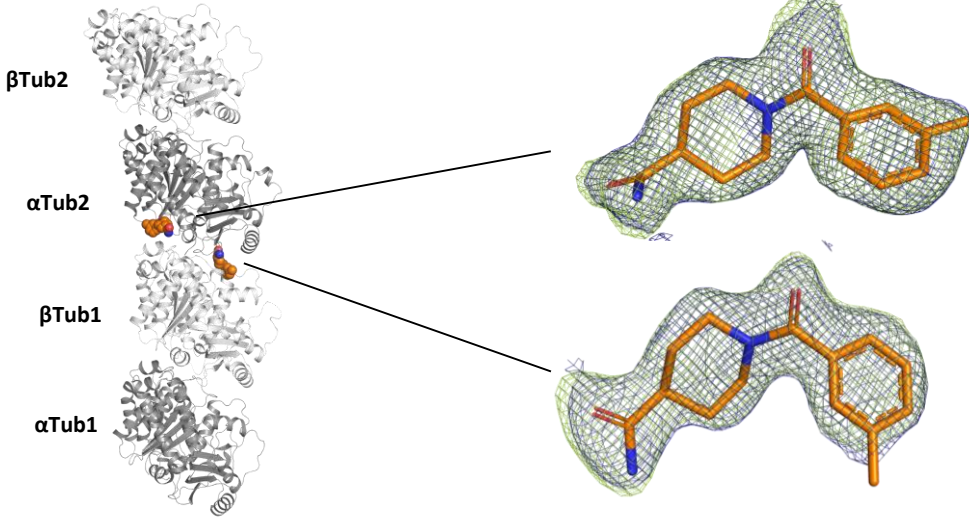

Fragment 30

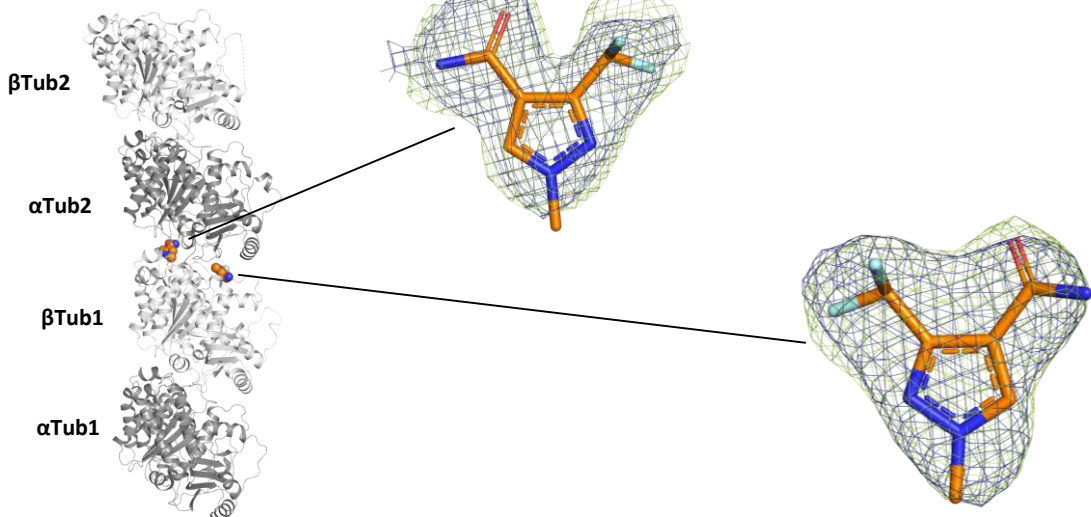

Figure S2 (continued)

Fragment 31

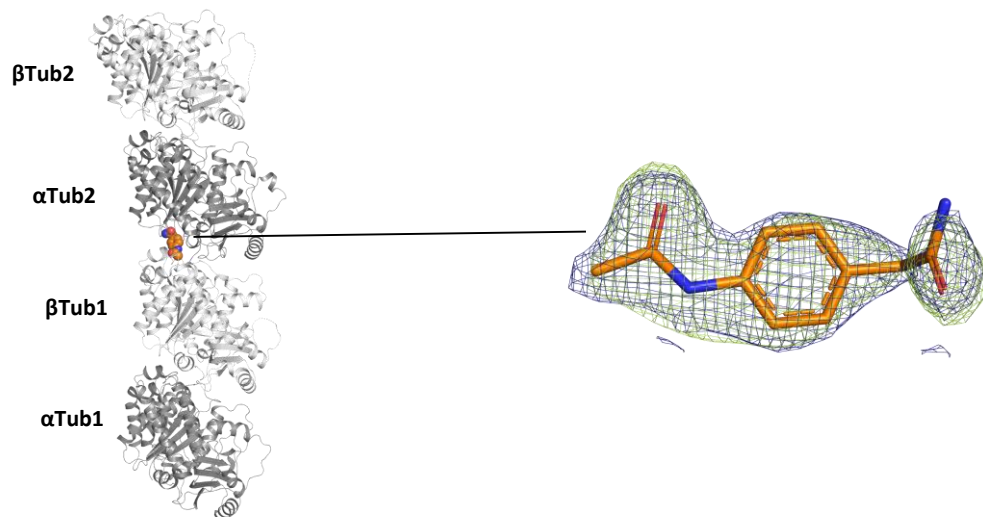

Fragment 32

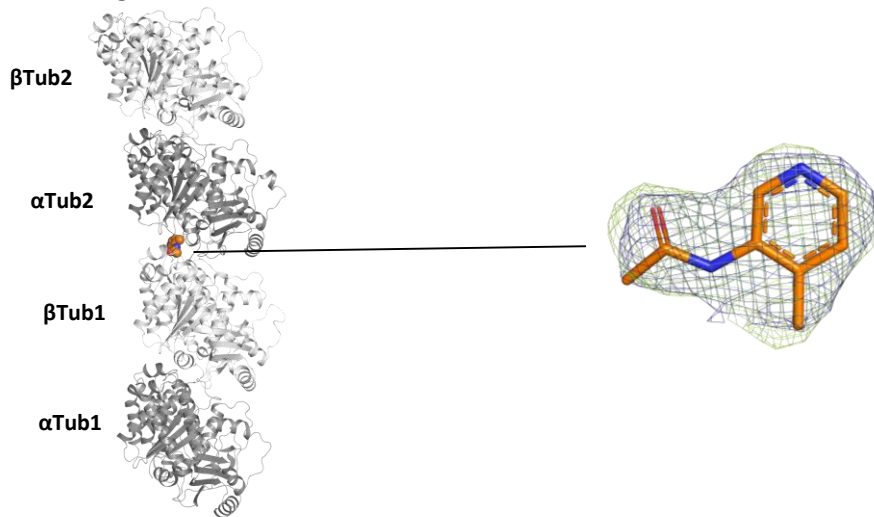

Fragment 33

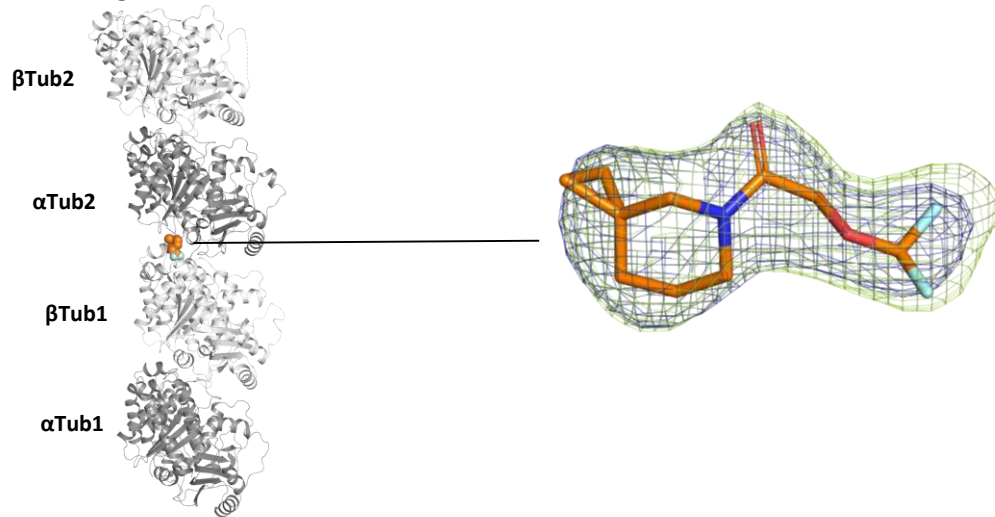

Figure S2 (continued)

**Fragment 34**

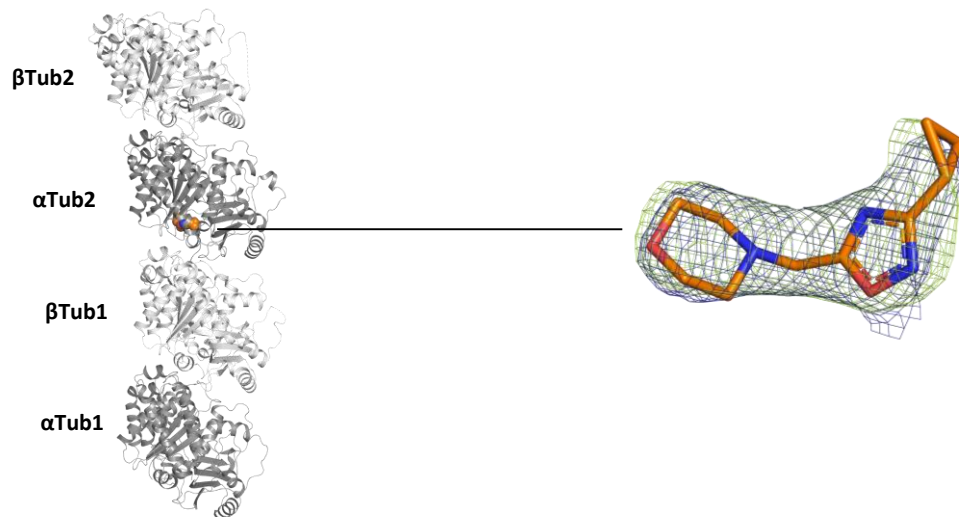

**Fragment 35**

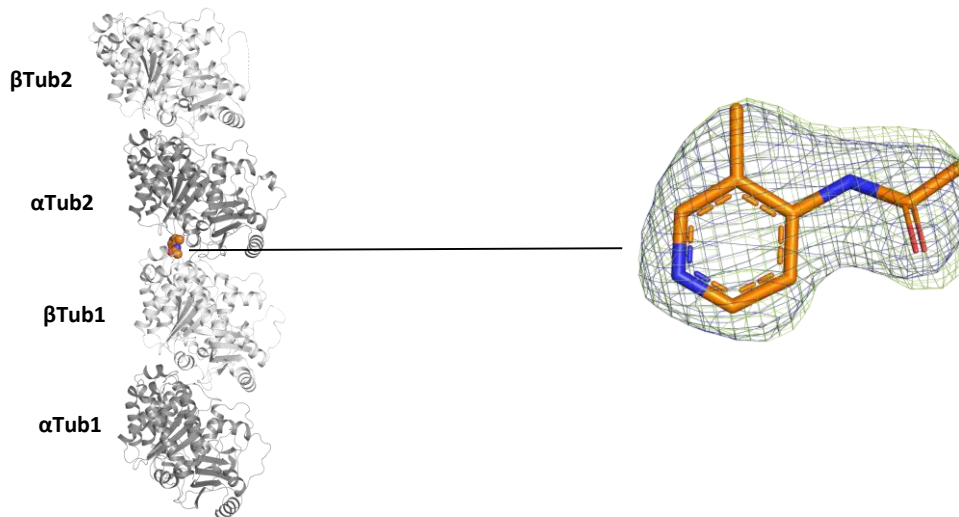

**Fragment 36**

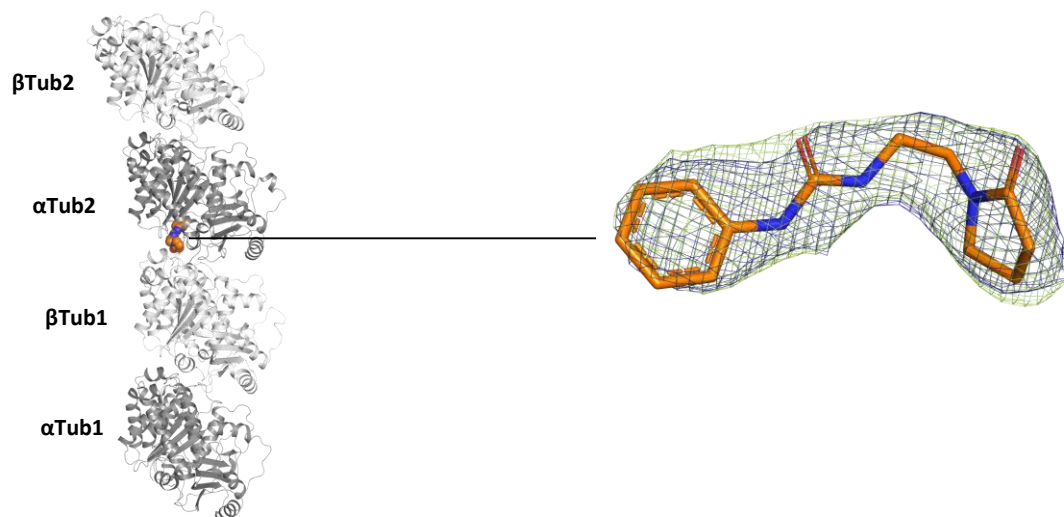

Figure S2 (continued)

Fragment 37

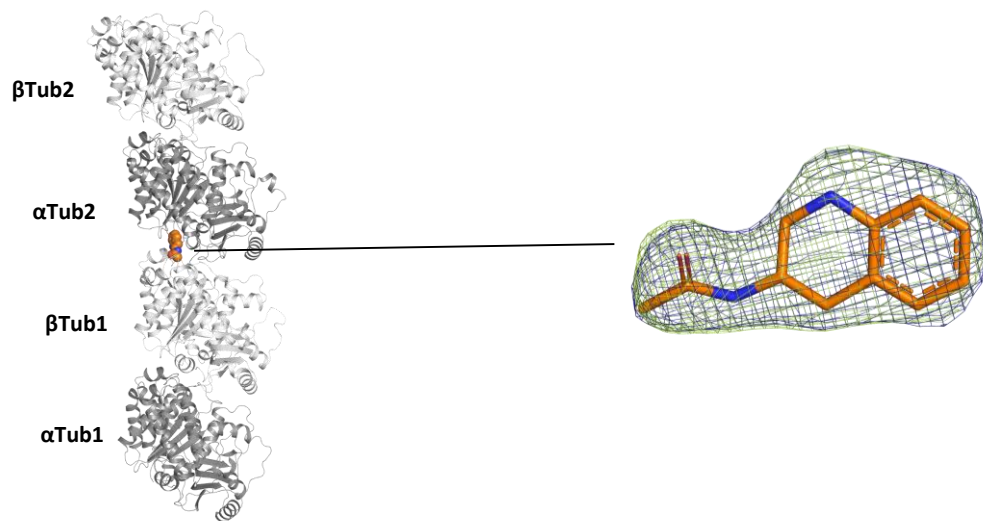

Fragment 38

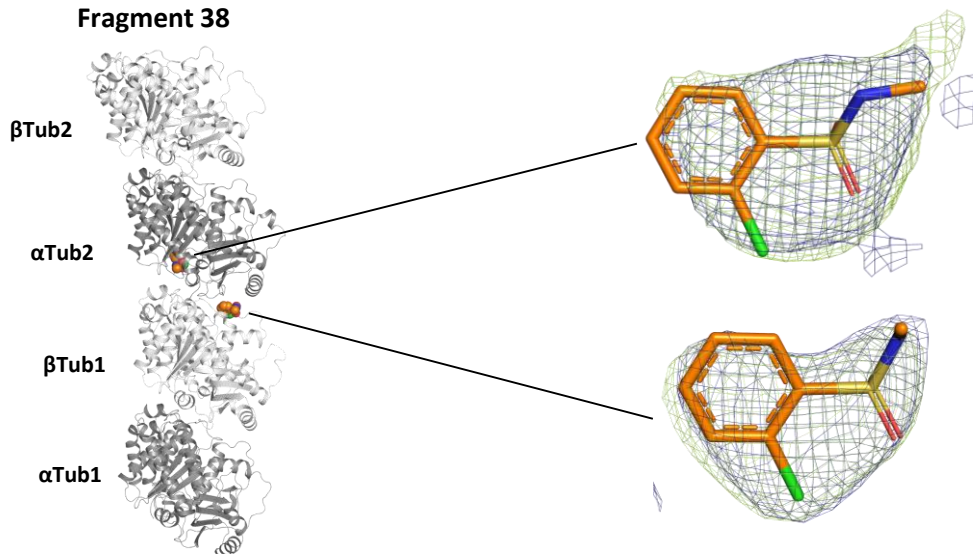

Fragment 39

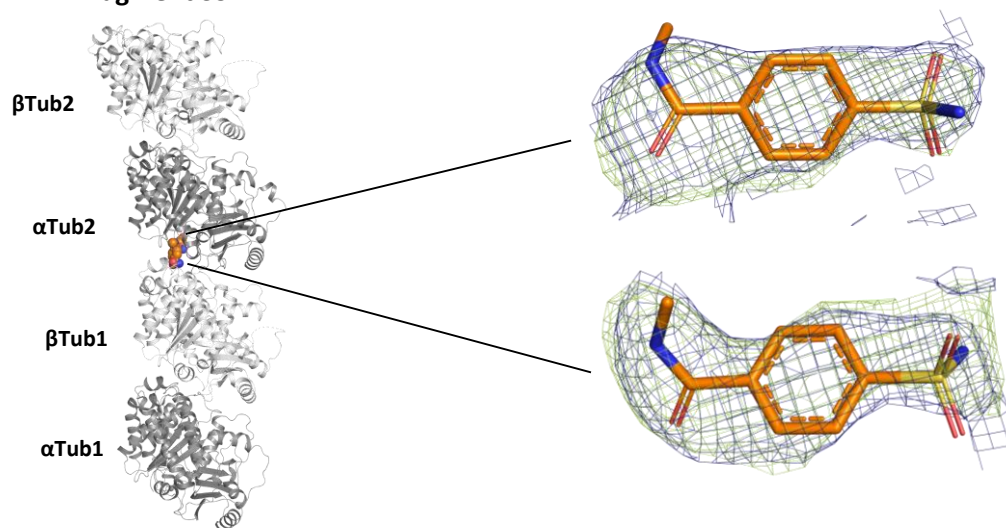

Figure S2 (continued)

Fragment 40

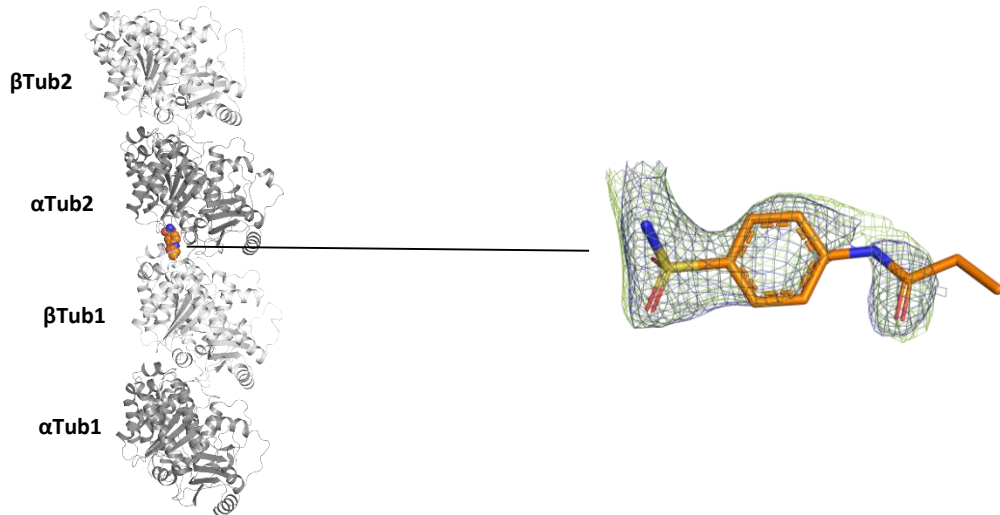

Fragment 41

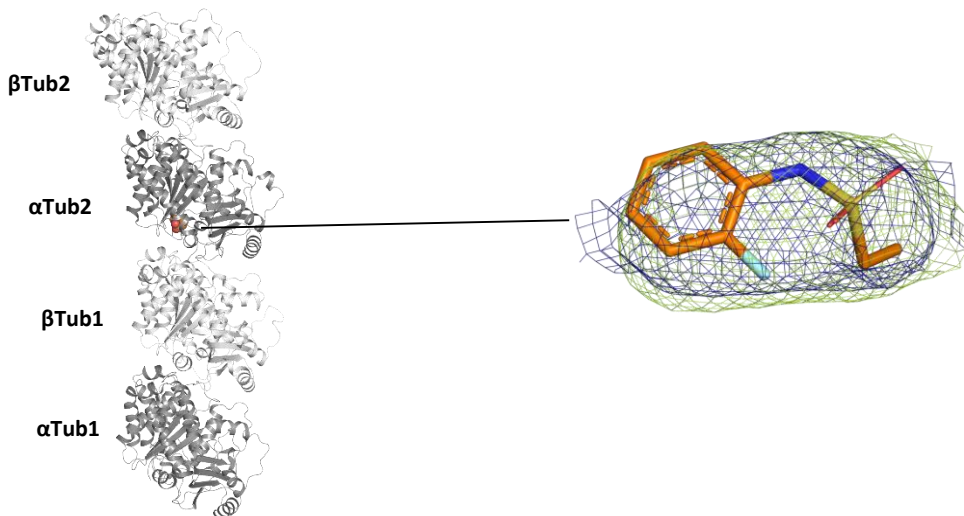

Fragment 42

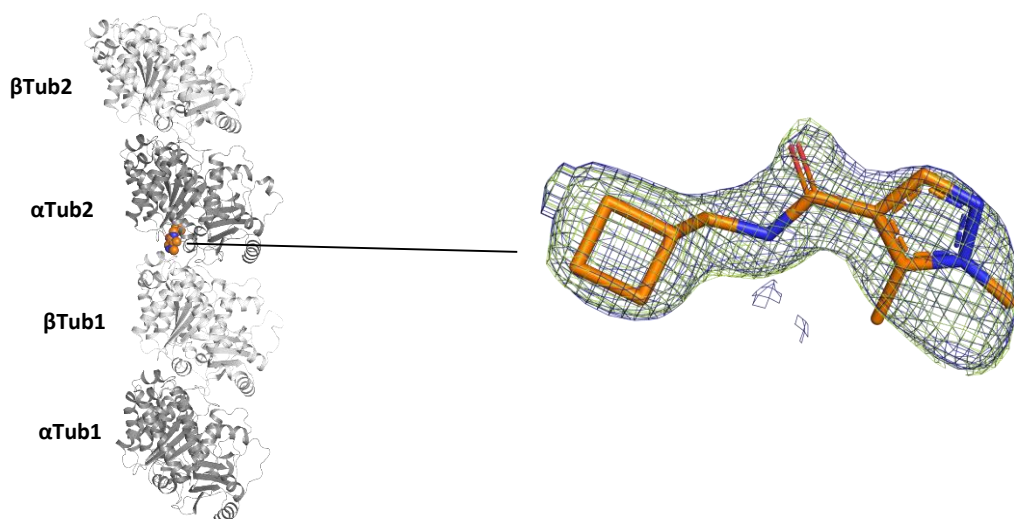

Figure S2 (continued)

**Fragment 43**

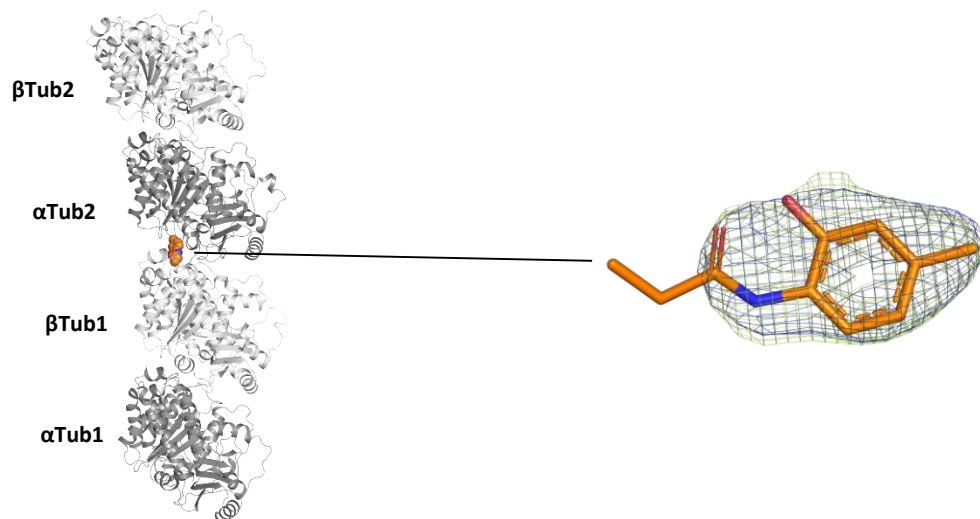

**Fragment 44**

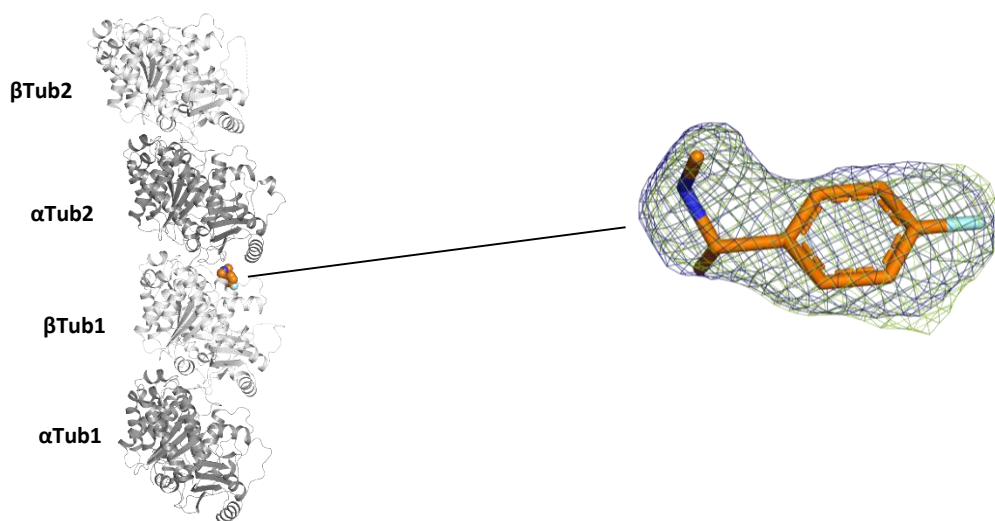

**Fragment 45**

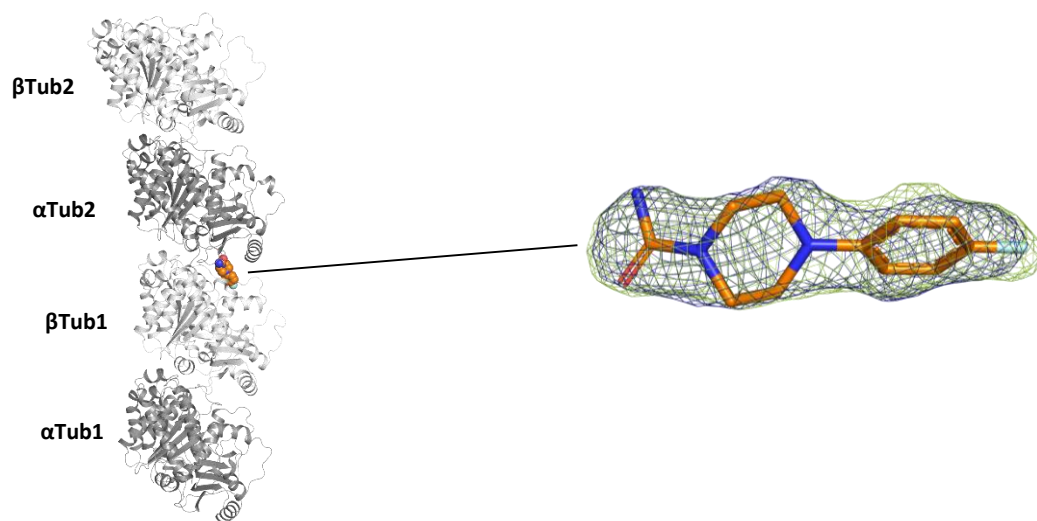



Figure S2 (continued)

Fragment 46

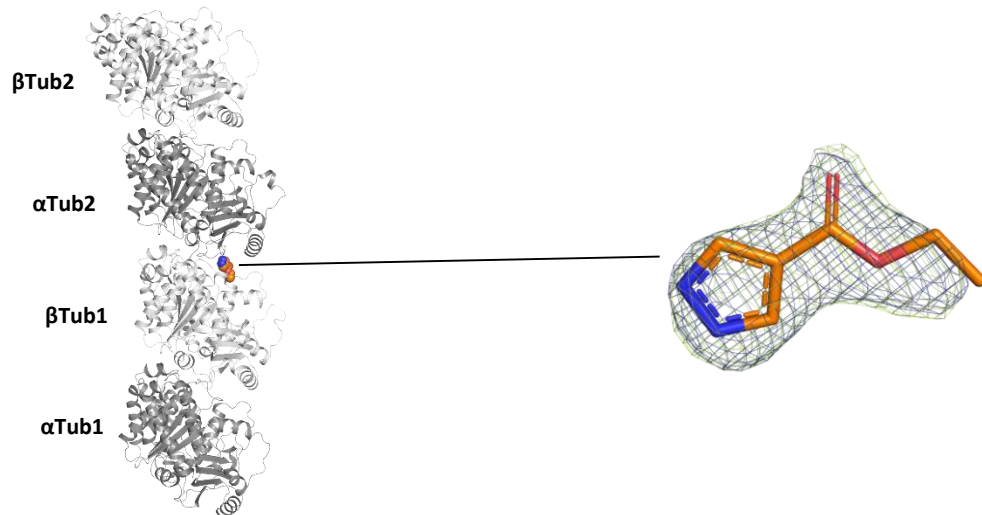

Fragment 47

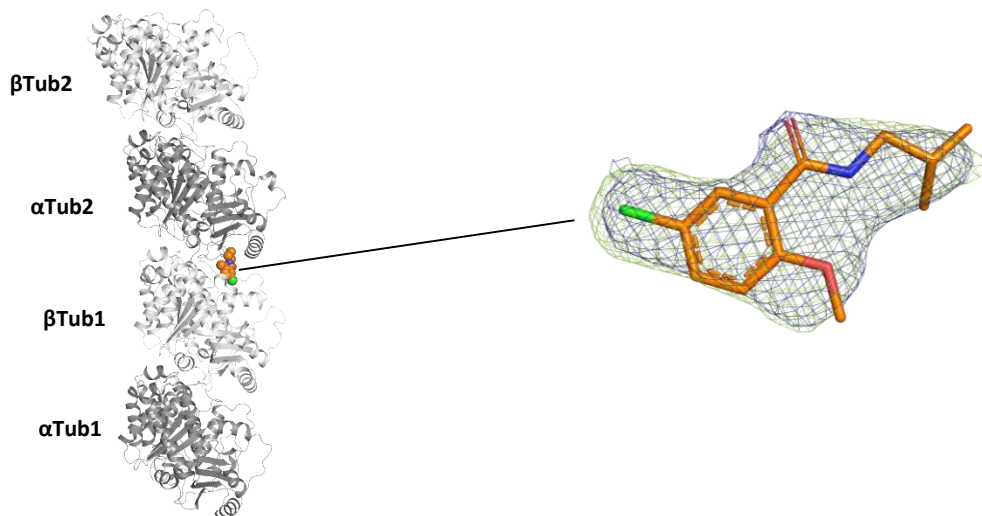

Fragment 48

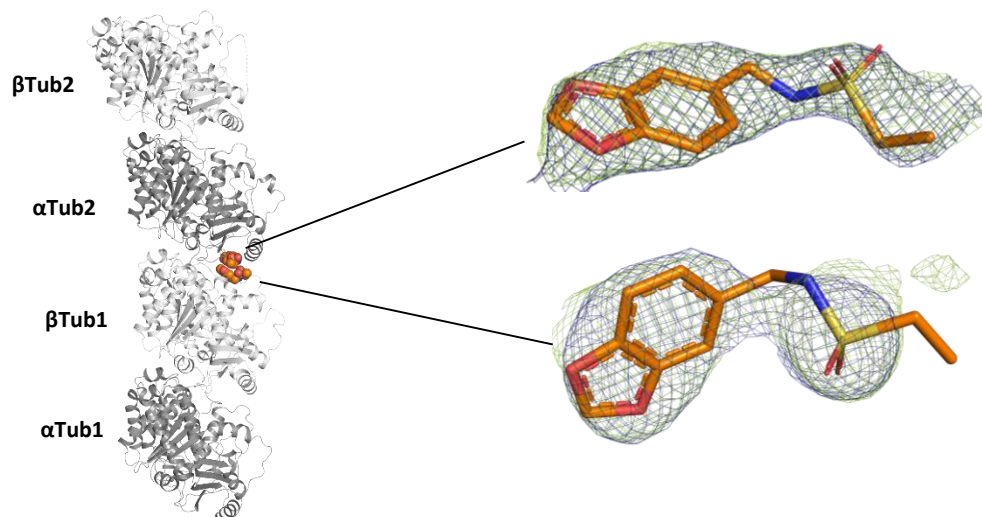

Figure S2 (continued)

Fragment 49

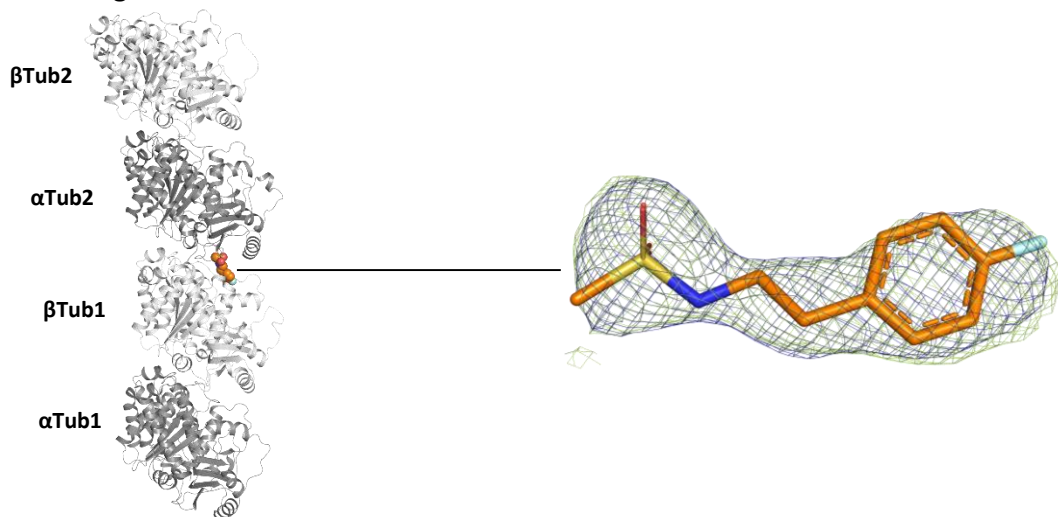

Fragment 50

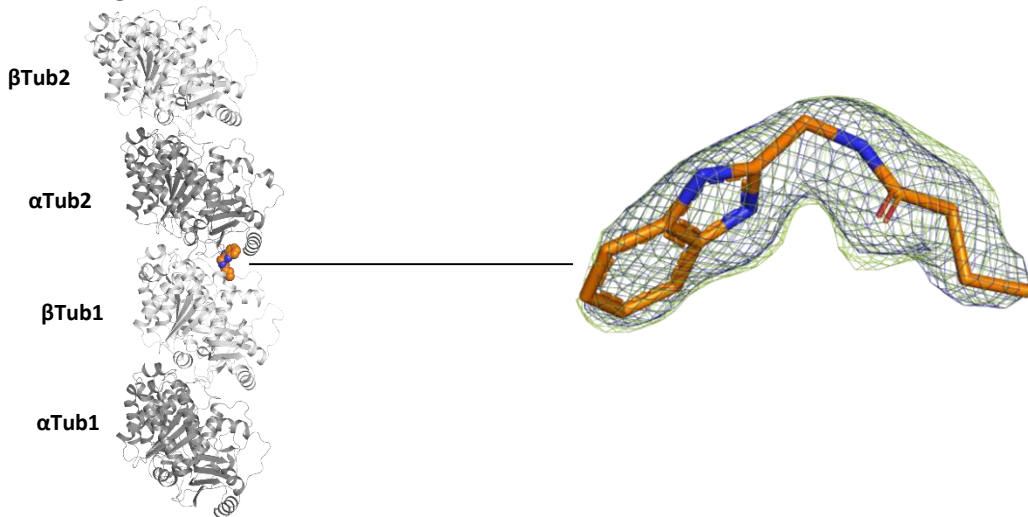

Fragment 51

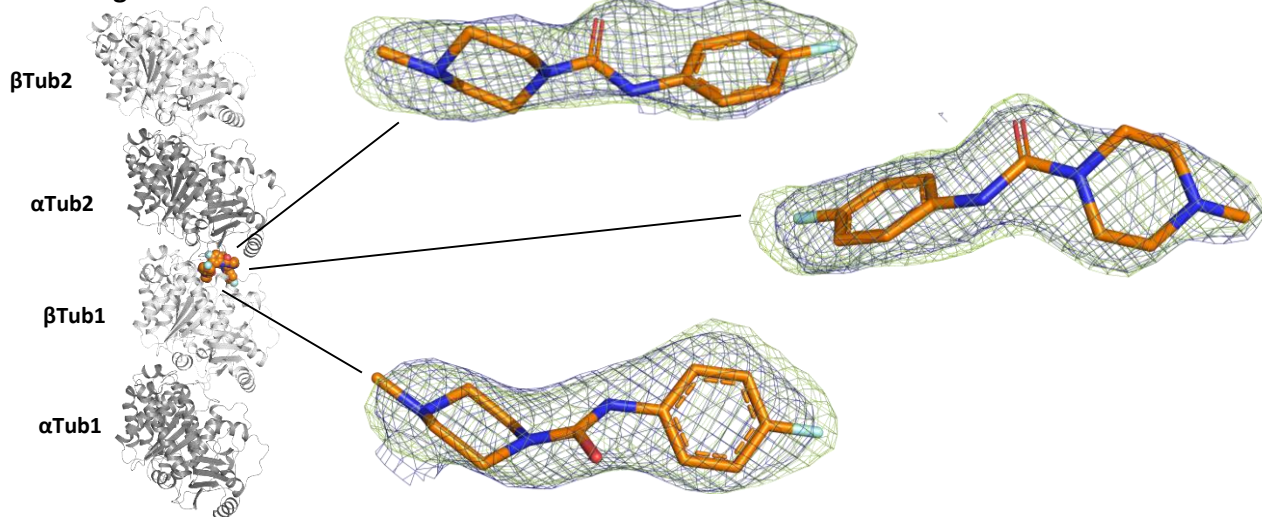

Figure S2 (continued)

Fragment 52

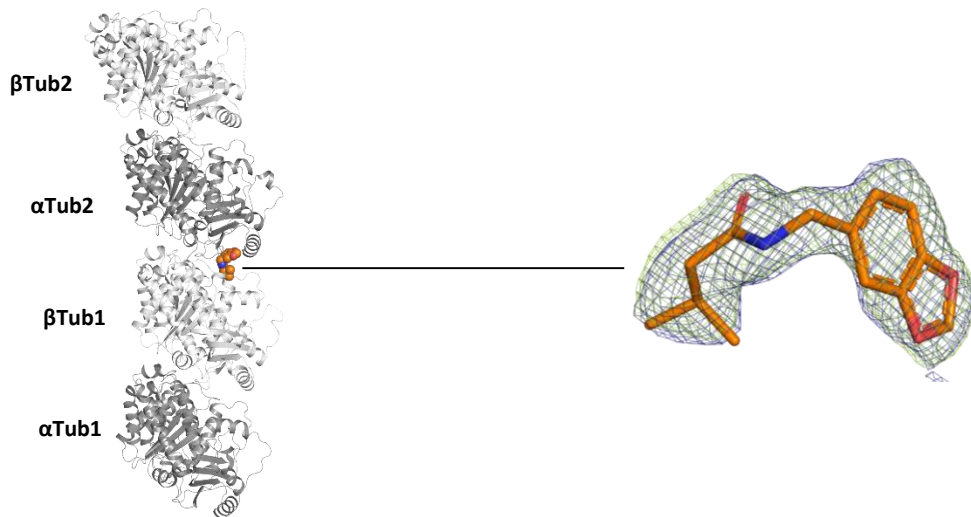

Fragment 53

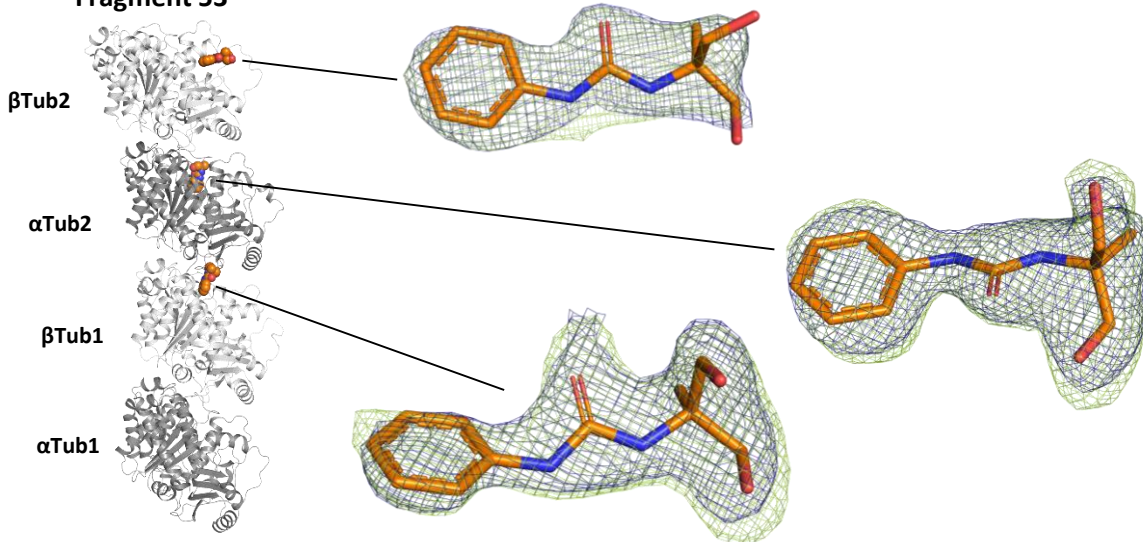

Fragment 54

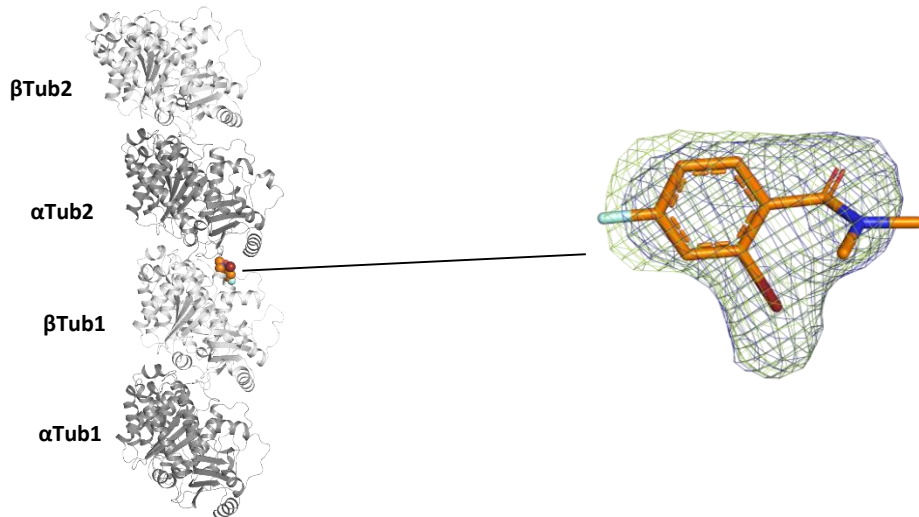

Figure S2 (continued)

Fragment 55

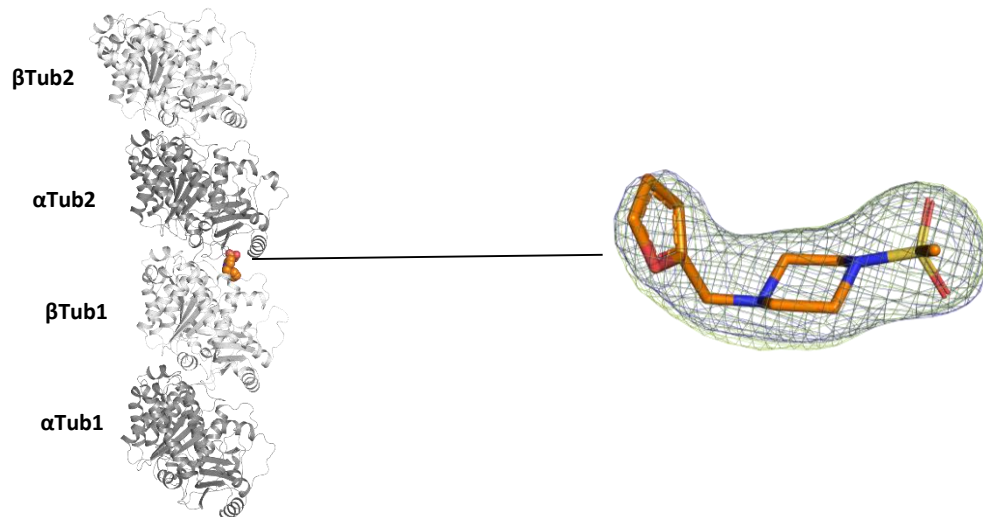

Fragment 56

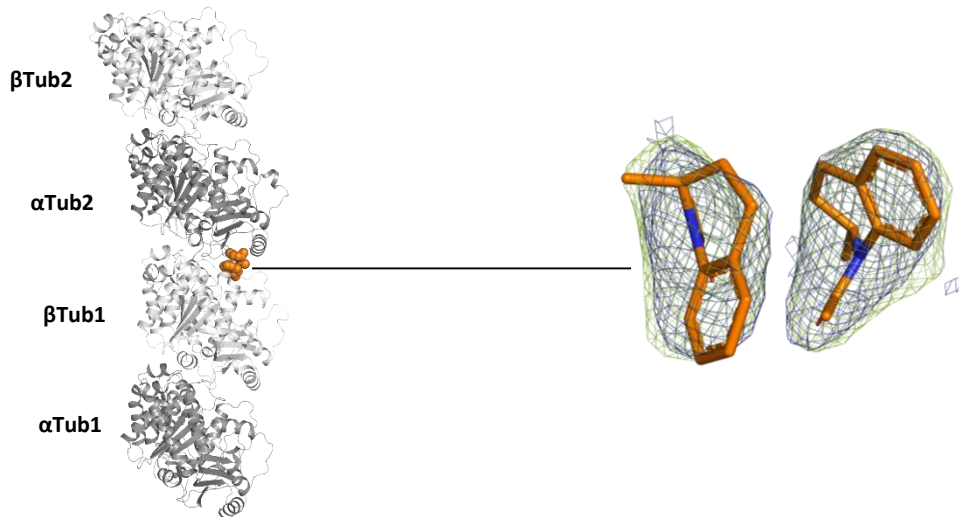

Fragment 57

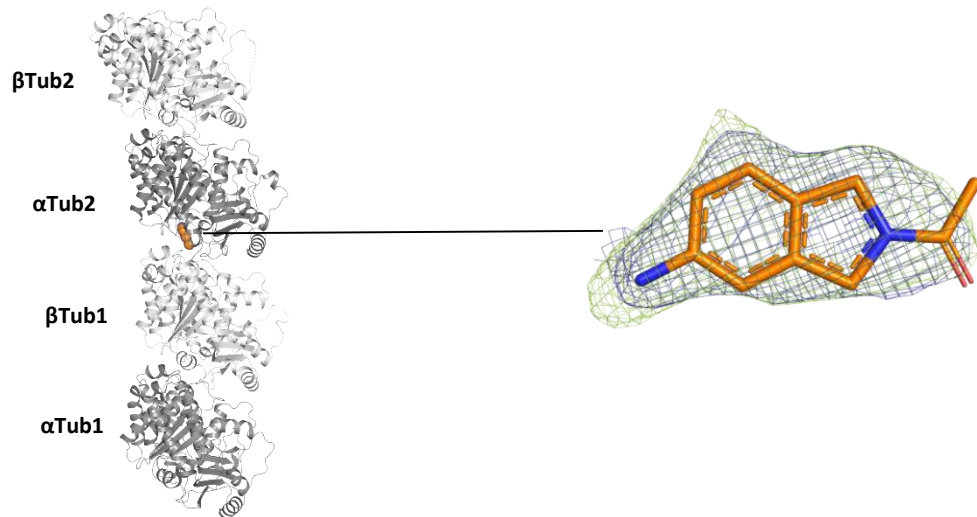

Figure S2 (continued)

Fragment 58

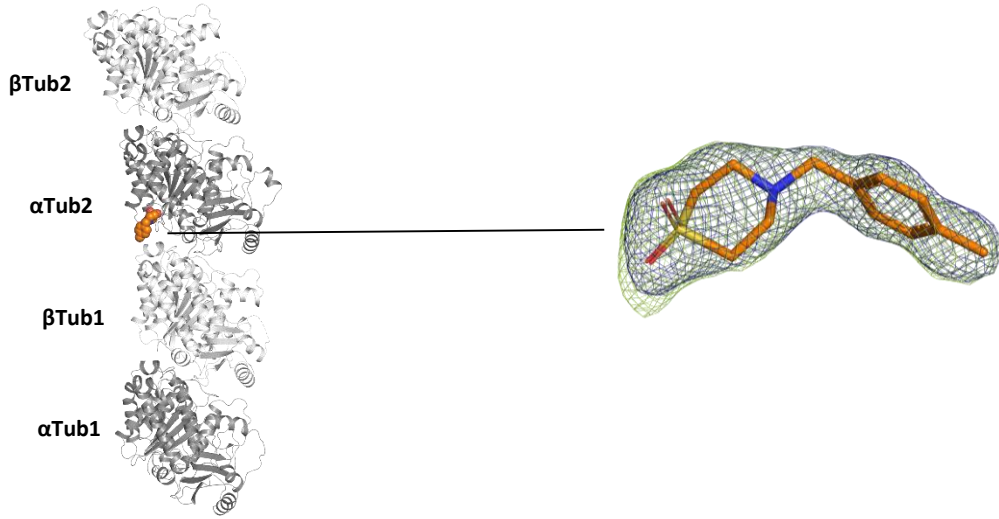

Fragment 59

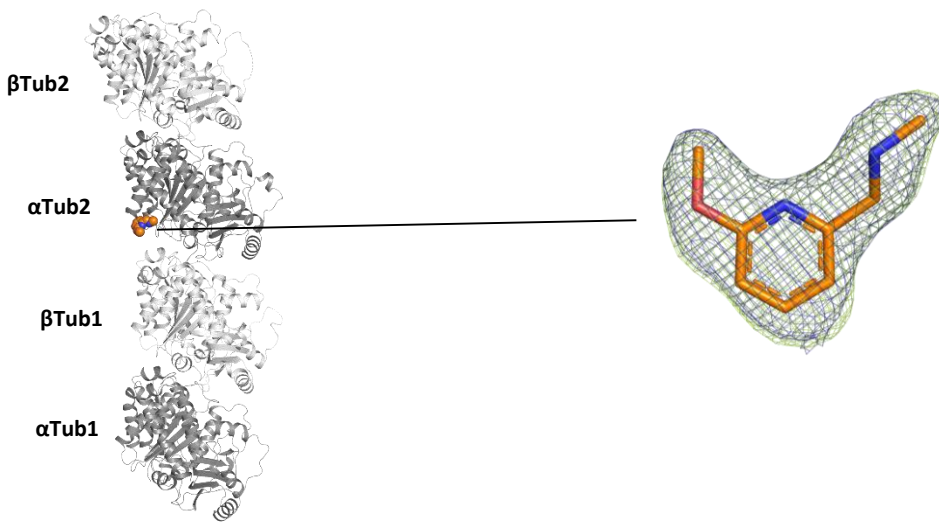

Figure S3

**$\beta$ -Tubulin**

**sID  $\beta$ I**

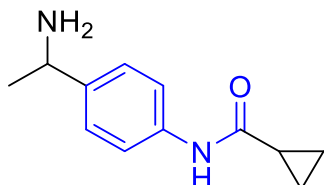

**Fragment 01**

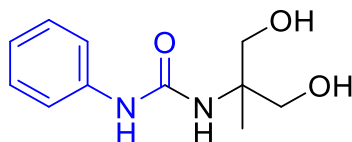

**Fragment 53, also binds to sID  $\beta$ I and  $\alpha$ II**

**sID  $\beta$ II**

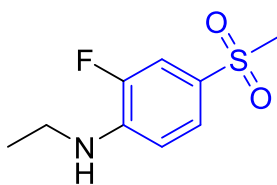

**Fragment 02, also binds to sID  $\alpha$ II**

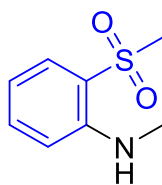

**Fragment 03, also binds to sID  $\beta$ IV and  $\beta$ III**

**sID  $\beta$ III**

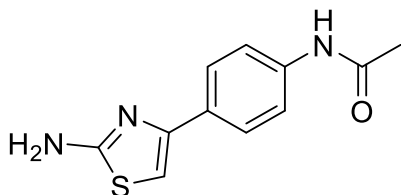

**Fragment 04, also binds to sID  $\beta$ III**

**sID  $\beta$ IV**

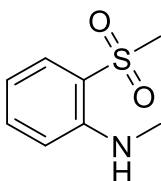

**Fragment 03, also binds to sID  $\beta$ II and  $\beta$ III**

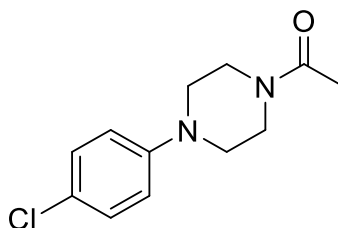

**Fragment 05, also binds to sID  $\alpha$ I,  $\beta$ III and X2**

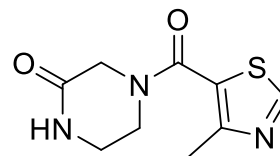

**Fragment 06**

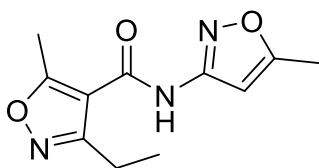

**Fragment 07 (binds twice), also binds to sID  $\beta$ III**

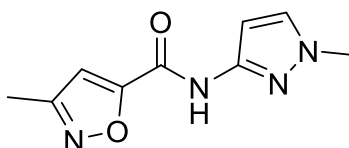

**Fragment 08 (binds twice)**

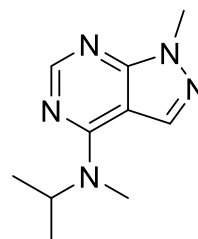

**Fragment 09**

## Figure S3 (continued)

### siD $\beta$ IV continued

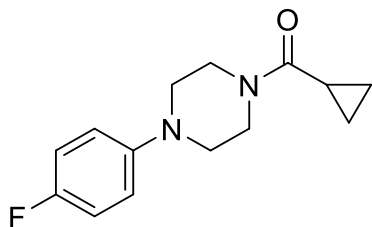

Fragment 10

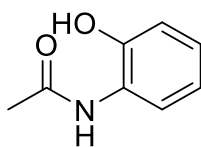

Fragment 11, also binds to siD  $\beta$ II

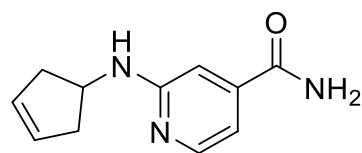

Fragment 12

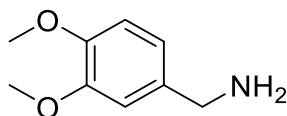

Fragment 13 (binds twice)

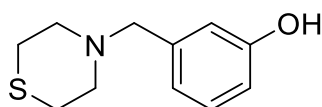

Fragment 14, also binds to siD  $\beta$ V

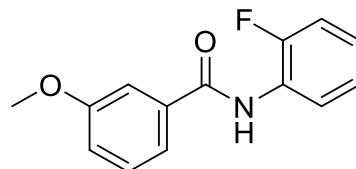

Fragment 15, also binds to siD  $\beta$ III

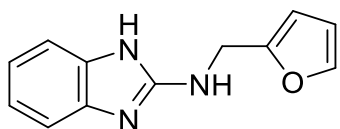

Fragment 16

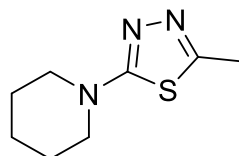

Fragment 17 (binds twice)

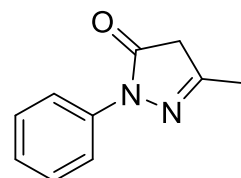

Fragment 18 (binds twice)

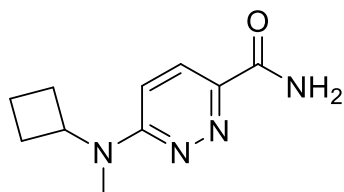

Fragment 19

### siD $\beta$ V

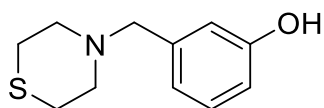

Fragment 14, also binds to siD  $\beta$ IV

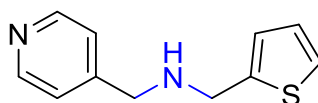

Fragment 20

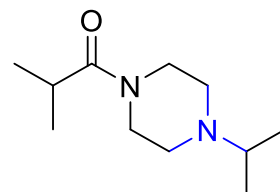

Fragment 21

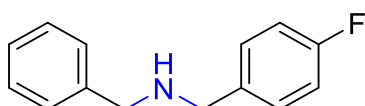

Fragment 22, also binds to siD  $\beta$ III

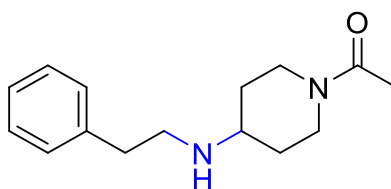

Fragment 23

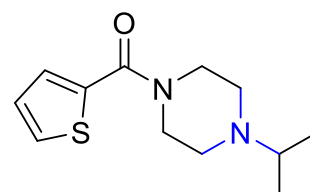

Fragment 24

## Figure S3 (continued)

### sID $\beta$ V continued

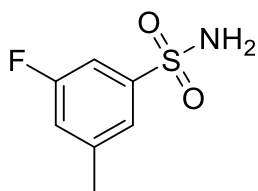

Fragment 25, also binds to sID  $\alpha$ II

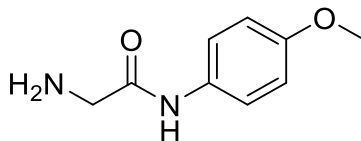

Fragment 26 (binds twice), also binds to sID  $\beta$ III and X1

### $\beta$ 1 $\alpha$ 2-Tubulin

#### sID $\beta$ $\alpha$ I

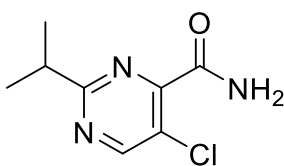

Fragment 27

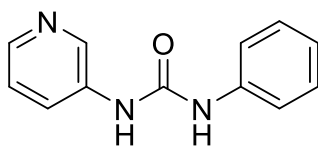

Fragment 28 (binds twice)

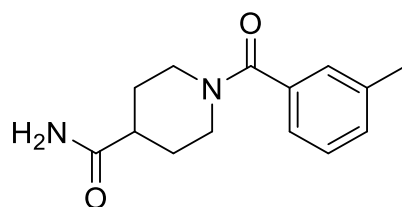

Fragment 29, also binds to sID  $\beta$ III

#### sID $\beta$ $\alpha$ II

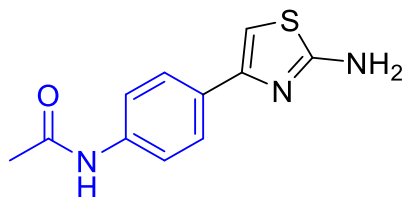

Fragment 04, also binds to sID  $\beta$ III

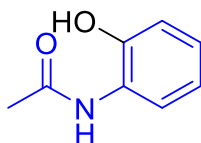

Fragment 11, also binds to sID  $\beta$ IV

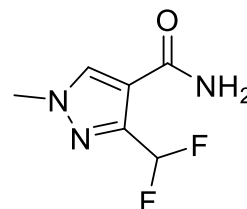

Fragment 30, also binds to sID  $\beta$ III

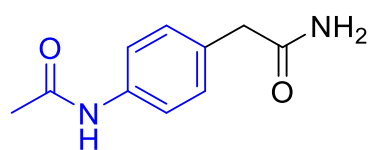

Fragment 31

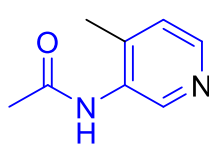

Fragment 32

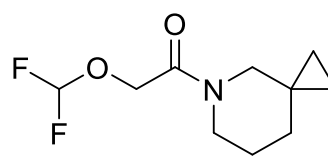

Fragment 33

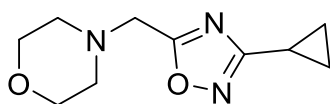

Fragment 34

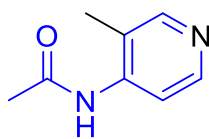

Fragment 35

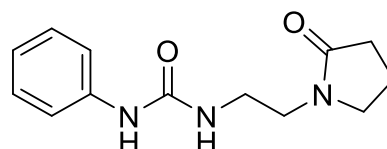

Fragment 36

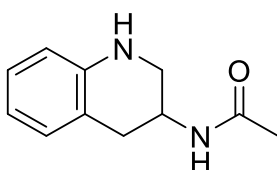

Fragment 37

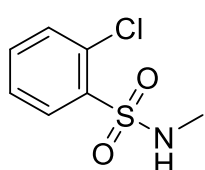

Fragment 38, also binds to sID  $\beta$ III

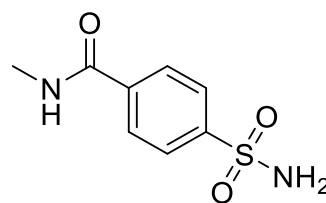

Fragment 39, also binds to sID X1



## Figure S3 (continued)

### siD $\beta$ all continued

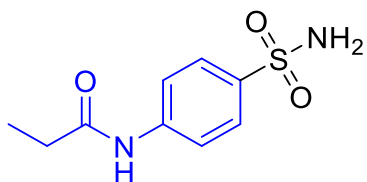

Fragment 40

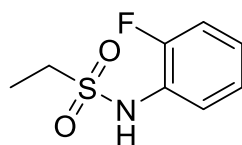

Fragment 41

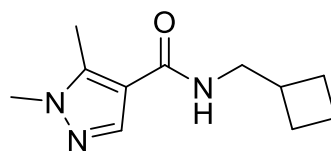

Fragment 42

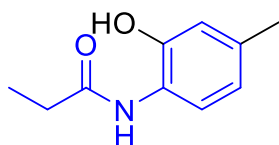

Fragment 43

### siD $\beta$ all

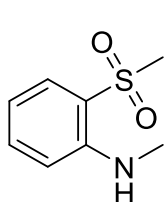

Fragment 03, also binds to siD  $\beta$ II and  $\beta$ IV

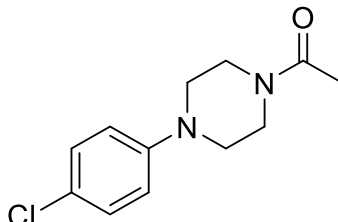

Fragment 05 (binds twice), also binds to siD  $\alpha$ I,  $\beta$ IV and X2

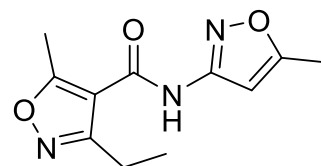

Fragment 07, also binds to siD  $\beta$ IV

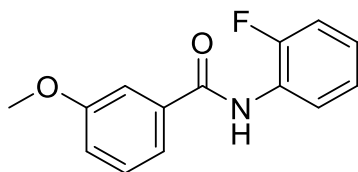

Fragment 15, also binds to siD  $\beta$ IV

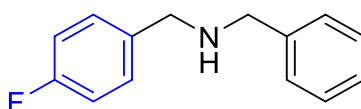

Fragment 22, also binds to siD  $\beta$ V

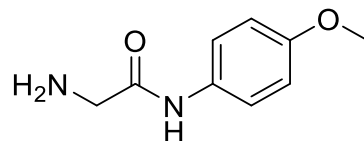

Fragment 26, also binds to siD  $\beta$ V and X1

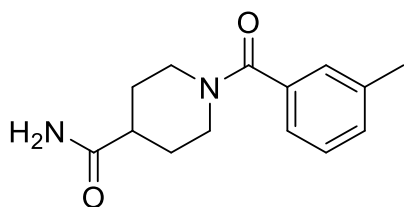

Fragment 29, also binds to siD  $\beta$ AI

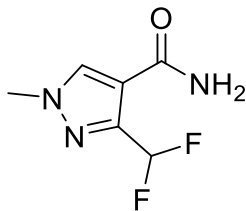

Fragment 30, also binds to siD  $\beta$ all

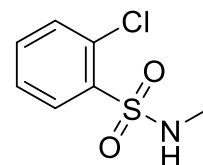

Fragment 38, also binds to siD  $\beta$ all

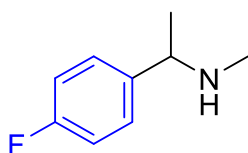

Fragment 44

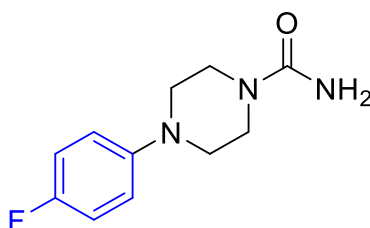

Fragment 45

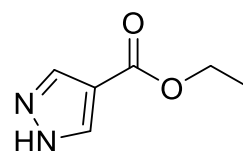

Fragment 46

## Figure S3 (continued)

### sID $\beta$ all continued

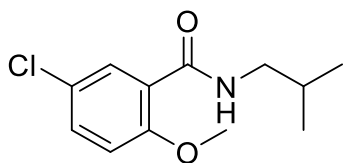

Fragment 47

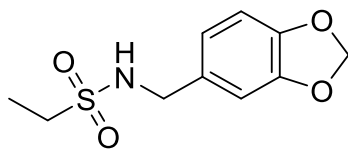

Fragment 48 (binds twice)

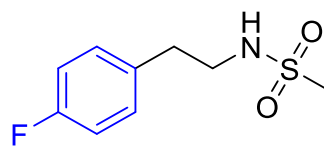

Fragment 49

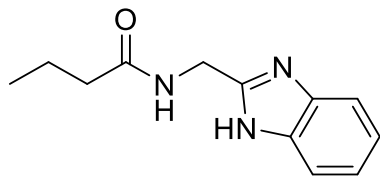

Fragment 50

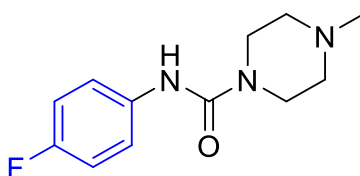

Fragment 51

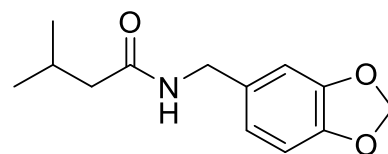

Fragment 52

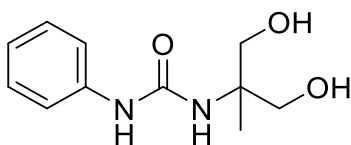

Fragment 53, also binds to sID  $\beta$ I and  $\alpha$ II

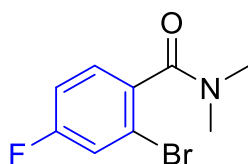

Fragment 54

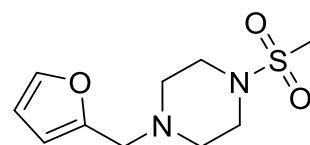

Fragment 55

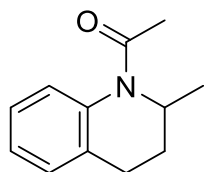

Fragment 56 (binds twice)

### $\alpha$ -Tubulin

#### sID $\alpha$ I

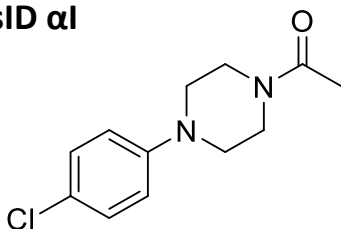

Fragment 05, also binds to sID  $\beta$ IV,  $\beta$ all and X2

#### sID $\alpha$ II

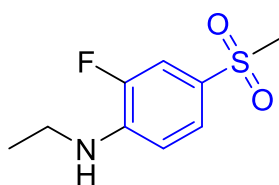

Fragment 02, also binds to sID  $\beta$ II

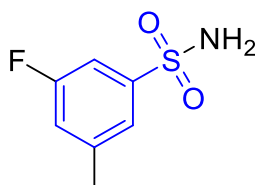

Fragment 25, also binds to sID  $\beta$ V

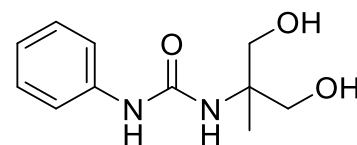

Fragment 53, also binds to sID  $\beta$ I and  $\beta$ all

## Figure S3 (continued)

### Crystal contact/binding partner in T<sub>2</sub>R-TTL

#### sID X1

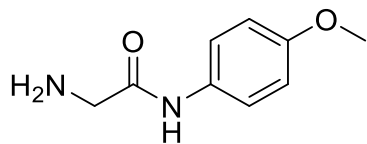

**Fragment 26**, also binds to sID  $\beta$ V and  $\beta$ all

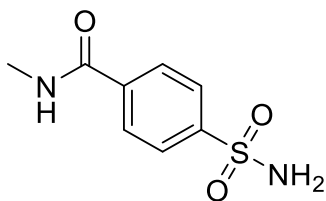

**Fragment 39**, also binds to sID  $\beta$ all

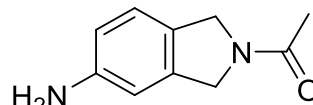

**Fragment 57**

#### sID X2

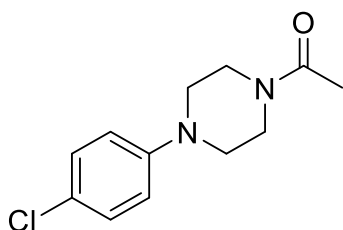

**Fragment 05**, also binds to sID  $\alpha$ ,  $\beta$ IV and  $\beta$ all

#### sID X3

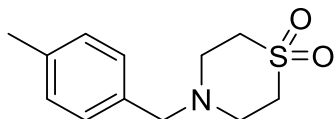

**Fragment 58**

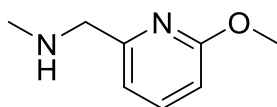

**Fragment 59**
