# Supplementary material for: Comprehensive Analysis of Binding Sites in Tubulin
Source: PubMed Central journal article supplement — Angew Chem Int Ed Engl. 2021 May 5;60(24):13331–42. doi: 10.1002/anie.202100273 (PMC8251789; doi:10.1002/anie.202100273), 2021-05-05
Supplement: ANIE-60-13331-s007.pdf [file ANIE-60-13331-s007.pdf]

## Supporting Information

### **Comprehensive Analysis of Binding Sites in Tubulin**

*Tobias Mühlethaler<sup>+</sup>, Dario Gioia<sup>+</sup>, Andrea E. Prota, May E. Sharpe, Andrea Cavalli,<sup>\*</sup> and Michel O. Steinmetz<sup>\*</sup>*

anie\_202100273\_sm\_miscellaneous\_information.pdf  
anie\_202100273\_sm\_miscellaneous\_information.xlsx

## **Author Contributions**

T.M. designed the research, performed crystallography work, analyzed the data, analyzed published tubulin-protein and tubulin-ligand complex structures, and wrote the paper. D.G. designed the research, performed computational work, analyzed the data, and wrote the paper. A.E.P. designed the research, performed and supervised the crystallography work and analyzed the data. M.E.S. performed crystallography work. A.C. designed the research, supervised the computational work, analyzed the data, and wrote the paper. M.O.S. designed the research, supervised the crystallography work, analyzed the data, wrote the paper, and coordinated the project.

## **SUPPLEMENTARY INFORMATION**

### **SUPPLEMENTARY MATERIALS AND METHODS**

#### **Molecular dynamics (MD) simulation**

*System preparation.* The starting structure of the  $\alpha\beta$ -tubulin heterodimer for the simulation was extracted from the high-resolution X-ray crystal structure of a protein complex consisting of two  $\alpha\beta$ -tubulin dimers, the stathmin-like domain of RB3 and tubulin tyrosine ligase (chains C and D of PDB ID 4I4T). The taxane site ligand as well as the calcium and chloride ions were removed. The model contained GTP and GDP molecules bound to the  $\alpha$ - and  $\beta$ -tubulin monomers, respectively, as well as their associated  $Mg^{2+}$  ions and their coordinating water molecules. The resulting structure possessed 440 out of 451 residues of  $\alpha$ -tubulin (UniProtKB ID P81947) and 431 out of 445 residues of  $\beta$ -tubulin (UniProtKB ID Q6B856). Missing residues belonging to the intrinsically disordered C-terminal tails of  $\alpha$ - and  $\beta$ -tubulin were not modeled. Residue protonation states were evaluated at pH 7.0 using the Protein Preparation Wizard tool<sup>[1]</sup> implemented in the Schrödinger 2015-2 suite, and then assigned by visual inspection. A trial protonation at 6.5 (i.e., the pH value of the crystallization condition used for the crystallographic fragment screen; see below) was also carried out, which showed that there is no difference in protonation states between pH 7.0 and 6.5. The  $\alpha\beta$ -tubulin heterodimer structure was solvated with the TIP3P-model<sup>[2]</sup> for water molecules in a truncated octahedron box using 12 Å as minimum distance between the protein and the box edges. The system was neutralized by adding  $Na^+$  ions resulting in a total of 123'776 atoms. The atomistic force field Amber-ff99SB-ILDN<sup>[3]</sup> was used for all simulations. Parameters for  $Mg^{2+}$  ions and the GTP and GDP molecules were developed by Allner et al.<sup>[4]</sup> and Meagher et al.<sup>[5]</sup>, respectively. The  $\alpha\beta$ -tubulin heterodimer system was assembled with the LEaP tool implemented in the AmberTools 14 software package<sup>[6]</sup>. Resulting coordinates and topology files have been converted to GROMACS file formats with ACPYPE<sup>[7]</sup>.

*MD simulations.* MD simulations were performed with GROMACS 4.6.7<sup>[8]</sup>. The  $\alpha\beta$ -tubulin heterodimer system was energy minimized using 5'000 cycles of the steepest descent algorithm. Subsequently, the system was equilibrated in four different stages using the V-rescale thermostat<sup>[9]</sup> and the Parrinello-Rahman barostat<sup>[10]</sup> with a relaxation time  $\tau$  of 2 ps and 0.1 ps, respectively, to keep the system at the desired target temperatures and pressure. The first three stages were run for 100 ps each in the NVT

ensemble with an integration time step of 1 fs at the increasing temperature values of 100, 200, and 300 K. For the two initial stages, backbone heavy atoms were harmonically restrained with a force constant of 1'000 kJ/mol/Å<sup>2</sup>. The last stage was run in the NPT ensemble for 1 ns with an integration time step of 1 fs. Bonds involving hydrogen atoms were restrained with the LINCS algorithm<sup>[11]</sup>. A short-range, non-bonded cut-off of 9 Å was applied, whereas long-range electrostatics were treated with the particle mesh Ewald (PME) method<sup>[12]</sup>. Periodic boundary conditions (PBC) were applied. After the equilibration stage, a 1.1 μs-long MD simulation was conducted with an integration time step of 2 fs in the NPT ensemble at a target temperature and pressure of 300 K and 1 atm, respectively.

*Binding pocket analysis.* Pockets were identified and tracked over the 1.1 μs of MD simulation by means of the Pocketron<sup>[12]</sup> module implemented in the BiKi Life Sciences software suite ([www.bikitechnologies.com](http://www.bikitechnologies.com))<sup>[13]</sup>. The two tubulin monomers were treated separately and the nucleotides, the ions, and the water molecules were removed prior to starting the calculation. Pocket detection is based on the solvent excluded surface concept<sup>[14]</sup>, and performed by rolling a spherical probe of a specific radius over the van der Waals surface of the biomolecular system<sup>[12]</sup>. Pockets are then identified by calculating the volumetric difference between the regions enclosed by two different solvent excluded surfaces, generated using two different probe radii. In our analysis, we selected the default values of 1.4 and 3.0 Å for the probe radii, and, additionally, the equivalent of five water molecules as cutoff value for the minimum detectable volume (i.e., 34.5 Å<sup>3</sup>). These settings have been chosen in order to filter the output and retrieve only those pockets that can be considered as potential fragment or small-molecule ligand binding sites. Because the contact between the α- and β-tubulin monomers generates a large rim, we noticed that, using our analysis criteria, many different pockets at the interface were detected as one extended entity. For this reason, we analyzed the α- and β-tubulin monomers independently from each other. Furthermore, only pockets that were persistent for at least 30 % during the entire simulation or are not located at the intra-dimer interface of αβ-tubulin were taken into account. One pocket involved the actual, artificial C-terminus of the β-tubulin structure (see above); it was thus not further considered.

### **Protein preparation, crystallographic fragment screening and structure refinement**

Protein purification and T<sub>2</sub>R-TTL complex formation was performed as previously described<sup>[15]</sup>. To produce T<sub>2</sub>R-TTL complex crystals, 400 nL drops at a 1:1 protein:reservoir ratio were set up in MRC3 vapor-diffusion

plates (Swissci AG) at 20°C in a precipitant solution consisting of 2% PEG 4K, 4 % glycerol, 30 mM MgCl<sub>2</sub>, 30 mM CaCl<sub>2</sub>, 100 mM MES/imidazole, pH 6.5, 5 mM L-tyrosine.

Suitable drops for fragment screening were chosen using the TeXRANK software package<sup>[16]</sup>. An Echo 550 instrument (Labcyte) was used to dispense the DSI-poised fragment library<sup>[17]</sup> (see also [https://www.diamond.ac.uk/Instruments/Mx/Fragment-Screening/New\\_Fragment-Libraries/DSi-Poised-Library.html](https://www.diamond.ac.uk/Instruments/Mx/Fragment-Screening/New_Fragment-Libraries/DSi-Poised-Library.html)). To the best of our knowledge, none of the fragments present in this library are known to bind to tubulin. Fragments were dispensed into the selected crystal drops to a final concentration of 100 mM fragment and 20% DMSO. After 1h soaking time, the crystals were mounted on loops using the Crystal Shifter Device (Oxford Lab Technologies) and subsequently cryo-cooled in liquid nitrogen. Native data sets were collected at 100 K at beamline I04-1 at the Diamond Light Source (Harwell Science and Innovation Campus, Didcot, UK). Data were processed using autoPROC<sup>[18]</sup>.

Structures were determined by the difference Fourier method using the phases of the T<sub>2</sub>R-TTL complex (PDB ID 5LXT) in the absence of ligands and solvent molecules as a starting point for refinement. The models were first fitted by several cycles of rigid body refinement followed by simulated annealing and restrained refinement in Phenix<sup>[19]</sup>. Well defined electron densities at contour levels of both 1.0  $\sigma$  (2mFo-DFc) and 3.0  $\sigma$  (mFo-DFc) and 50% occupancy upon refinement were chosen as selection threshold for modeling the bound fragments. Ligands were built with Coot's Lidia and the resulting models were further improved using Coot<sup>[20]</sup>. MolProbity was used to assess the quality of the structures<sup>[21]</sup>. Chains in the T<sub>2</sub>R-TTL complex were defined as follows: chain A,  $\alpha$ 1-tubulin; chain B,  $\beta$ 1-tubulin; chain C,  $\alpha$ 2-tubulin; chain D,  $\beta$ 2-tubulin; chain E, RB3; chain F, TTL.

Structure visualization, molecular editing and figure preparation were performed with the PyMOL molecular graphics system (The PyMOL Molecular Graphics System, Version 2.2.3 Schrödinger, LLC). Fragment volumes were calculated using the volume\_calc.py script of the Schrödinger Suite. Notably, two fragments bound to a site formed at the interface between the RB3 and  $\alpha$ 2-tubulin and another fragment bound to a site located between  $\alpha$ 2-tubulin and a symmetry related tubulin molecule in the crystal. These three fragments were not further considered for our analysis and denoted as X1 and X3 in Table S3. In addition, three fragments have a second binding site formed by a symmetry related tubulin or TTL, which was not counted as an additional binding site. No fragments bound to TTL.

### **Analysis of tubulin-tubulin and tubulin- or microtubule-protein contact points**

The Protein Data Bank (PDB) was exhaustively searched for tubulin and microtubule structures with a resolution  $<4.5$  Å for X-ray crystallography structures and  $<8$  Å for cryo-electron microscopy structures. For the tubulin-tubulin contact point analysis in the context of the microtubule lattice, we superimposed the  $\alpha$ - or  $\beta$ -tubulin monomers of the T<sub>2</sub>R-TTL complex onto the corresponding ones in a microtubule. Residues within 4 Å distance from an adjacent tubulin monomer in the microtubule lattice were then identified using PyMOL and compared to the residues forming a computationally predicted pocket or an experimentally determined fragment site. For the tubulin- and microtubule-protein contact point analysis, we superimposed the  $\alpha$ - or  $\beta$ -tubulin monomers of the T<sub>2</sub>R-TTL complex onto the tubulin monomers to which a protein partner was bound. Subsequently, the same analysis as for tubulin-tubulin contact points was performed. A contact-point overlap is considered in cases where  $>20\%$  of the residues forming a pocket or site are at a maximal distance of 4 Å from interacting residues of a binding partner (i.e.,  $\alpha$ -tubulin,  $\beta$ -tubulin or protein partner). Superimposition of “curved” onto “straight” tubulin structures was performed as previous reported<sup>[22]</sup> by including only residues of the corresponding N- and C-terminal domains of a tubulin monomer.

## SUPPLEMENTARY FIGURE LEGENDS

### Figure S1. MD simulation.

Calculated root mean square deviations (RMSD) of the C $\alpha$  atoms of the  $\alpha\beta$ -tubulin heterodimer from the initial X-ray structure plotted as a function of time with (red) and without (blue) the H1-S2, M, and S9-S10 loops of both tubulin monomers. The lighter color represents the effective sampling of the RMSD during the simulation, whereas the darker lines have been obtained to approximate the data with a Bezier curve in order to cut off noise.

### Figure S2. Electron densities of T<sub>2</sub>R-TTL-fragment complex structures.

For each fragment, the location of the fragment within the two  $\alpha\beta$ -tubulin heterodimers of the T<sub>2</sub>R-TTL complex is shown on the left. For simplicity, the RB3 and TTL molecules were omitted. The  $\alpha$ - and  $\beta$ -tubulin monomers are shown in ribbon representation and colored in dark and light gray, respectively. Fragments are shown in orange sphere representation. Electron-density maps of the fragments are shown on the right. The SigmaA-weighted 2mFo-DFc (dark blue mesh) and mFo-DFc (light green mesh) omit maps are contoured at +1.0  $\sigma$  and +3.0  $\sigma$ , respectively. The map calculations excluded the atoms of the ligand.

### Figure S3. Chemical structures of fragments.

The chemical structures of the 59 fragments identified in our crystallographic screen are ordered by sIDs and fragment IDs (see also Table S2 and Table S3). Fragments binding as pairs two times to the same site and/or binding to another sID are labeled accordingly. Identical fragment moieties that were experimentally found to interact in a similar manner with residues forming a site are defined as common “binding motif” and are highlighted in blue (see also Figure 3).

## SUPPLEMENTARY REFERENCES

- [1] G. M. Sastry, M. Adzhigirey, T. Day, R. Annabhimoju, W. Sherman, *J Comput Aided Mol Des* **2013**, *27*, 221-234.
- [2] W. L. Jorgensen, L. Chandrasekhar, J. D. Madura, R. W. Impey, M. L. Klein, *J. Chem. Phys.* **1983**, *79*, 10.
- [3] K. Lindorff-Larsen, S. Piana, K. Palmo, P. Maragakis, J. L. Klepeis, R. O. Dror, D. E. Shaw, *Proteins* **2010**, *78*, 1950-1958.
- [4] O. Allner, L. Nilsson, A. Villa, *J Chem Theory Comput* **2012**, *8*, 1493-1502.
- [5] K. L. Meagher, L. T. Redman, H. A. Carlson, *J.Comput.Chem.* **2003**, *24*, 1016-1025.
- [6] D. A. Case, V. Babin, J. Berryman, R. M. Betz, Q. Cai, D. S. Cerutti, T. Cheatham, T. Darden, R. Duke, H. Gohlke, A. Götz, S. Gusarov, N. Homeyer, P. Janowski, J. Kaus, I. Kolossváry, A. Kovalenko, T.-S. Lee, P. A. Kollman, *AMBER 14, University of California, San Francisco*, **2014**.
- [7] J. Wang, W. Wang, P. A. Kollman, D. A. Case, *J Mol Graph Model* **2006**, *25*, 247-260.
- [8] S. Pronk, S. Pall, R. Schulz, P. Larsson, P. Bjelkmar, R. Apostolov, M. R. Shirts, J. C. Smith, P. M. Kasson, D. van der Spoel, B. Hess, E. Lindahl, *Bioinformatics.* **2013**, *29*, 845-854.
- [9] G. Bussi, D. Donadio, M. Parrinello, *J.Chem.Phys.* **2007**, *126*, 014101.
- [10] M. Parrinello, A. Rahman, *Journal of Applied Physics* **1981**, *52*, 7182-7182.
- [11] B. Hess, H. Bekker, H. J. C. Berendsen, J. G. E. M. Fraaije, *J. Comput. Chem.* **1997**, *18*, 10.
- [12] G. La Sala, S. Decherchi, M. De Vivo, W. Rocchia, *ACS Cent Sci* **2017**, *3*, 949-960.
- [13] S. Decherchi, G. Bottegoni, A. Spitaleri, W. Rocchia, A. Cavalli, *J Chem Inf Model* **2018**, *58*, 219-224.
- [14] M. L. Connolly, *J. Appl. Cryst.* **1983**, *5*, 11.
- [15] aA. E. Prota, K. Bargsten, D. Zurwerra, J. J. Field, J. F. Diaz, K. H. Altmann, M. O. Steinmetz, *Science* **2013**, *339*, 587-590; bA. E. Prota, M. M. Magiera, M. Kuijpers, K. Bargsten, D. Frey, M. Wieser, R. Jaussi, C. C. Hoogenraad, R. A. Kammerer, C. Janke, M. O. Steinmetz, *J.Cell Biol.* **2013**, *200*, 259-270.
- [16] J. T. Ng, C. Dekker, M. Kroemer, M. Osborne, F. von Delft, *Acta Crystallogr D Biol Crystallogr* **2014**, *70*, 2702-2718.
- [17] O. B. Cox, T. Krojer, P. Collins, O. Monteiro, R. Talon, A. Bradley, O. Fedorov, J. Amin, B. D. Marsden, J. Spencer, F. von Delft, P. E. Brennan, *Chem Sci* **2016**, *7*, 2322-2330.
- [18] C. Vonrhein, C. Flensburg, P. Keller, A. Sharff, O. Smart, W. Paciorek, T. Womack, G. Bricogne, *Acta Crystallogr D Biol Crystallogr* **2011**, *67*, 293-302.
- [19] P. D. Adams, P. V. Afonine, G. Bunkoczi, V. B. Chen, I. W. Davis, N. Echols, J. J. Headd, L. W. Hung, G. J. Kapral, R. W. Grosse-Kunstleve, A. J. McCoy, N. W. Moriarty, R. Oeffner, R. J. Read, D. C. Richardson, J. S. Richardson, T. C. Terwilliger, P. H. Zwart, *Acta Crystallogr.D.Biol.Crystallogr.* **2010**, *66*, 213-221.
- [20] P. Emsley, K. Cowtan, *Acta Crystallogr.D.Biol.Crystallogr.* **2004**, *60*, 2126-2132.



- [21] I. W. Davis, L. W. Murray, J. S. Richardson, D. C. Richardson, *Nucleic Acids Res.* **2004**, *32*, W615-W619.
- [22] R. B. Ravelli, B. Gigant, P. A. Curmi, I. Jourdain, S. Lachkar, A. Sobel, M. Knossow, *Nature* **2004**, *428*, 198-202.

**Table S1. Tubulin pockets predicted by MD simulation.**

**β-Tubulin**

| pID <sup>1</sup> | Max. volume <sup>2</sup><br>(Å <sup>3</sup> ) | SS <sup>3</sup>                                      | ResID <sup>4</sup><br>(p > 20 %)                                                                                                                                                                                                                                                                                     | Average Volume <sup>5</sup><br>(Å <sup>3</sup> ) | Persistency <sup>6</sup><br>(%) | Notes                                                                                                |
|------------------|-----------------------------------------------|------------------------------------------------------|----------------------------------------------------------------------------------------------------------------------------------------------------------------------------------------------------------------------------------------------------------------------------------------------------------------------|--------------------------------------------------|---------------------------------|------------------------------------------------------------------------------------------------------|
| βI               | 271.5                                         | βT5<br>βH5<br>βH11                                   | <b>βPro 173</b> (β-ns)<br><b>βSer 174</b> (β-ns)<br>βPro 175<br><b>βSer 178</b> (β-ns)<br>βThr 180<br>βVal 181<br><b>βGlu 183</b> (β-ns)<br>βPro 184<br>βArg 390<br>βIle 391<br>βGln 394                                                                                                                             | 111.2                                            | 58                              | Part of the maytansine site where the C15-C33 moiety of plocabulin binds<br><br>Equivalent to pID αI |
| β-ns             | 738.5                                         | βH1<br>βS4<br>βT4<br>βS5<br>βT5<br>βH5<br>βH6<br>βH7 | <b>βGln 11</b> (βII)<br><b>βCys 12</b> (βII)<br><b>βGln 15</b> (βVI)<br>βIle 16<br><b>βSer 140</b> (βII)<br>βGly 142<br>βVal 171<br><b>βPro 173</b> (βI)<br><b>βSer 174</b> (βI)<br>βVal 177<br><b>βSer 178</b> (βI)<br><b>βGlu 183</b> (βI)<br>βAsn 206<br>βLeu 209<br>βTyr 224<br>βLeu 227<br>βAsn 228<br>βVal 231 | 223.4                                            | 87                              | Occupied with GDP                                                                                    |
| βII              | 736.5                                         | βS1<br>βH1<br>βS2<br>βT2<br>βS4<br>βT4<br>βH4        | βAla 9<br>βGly 10<br><b>βGln 11</b> (β-ns)<br><b>βCys 12</b> (β-ns)<br>βGly 13<br>βAsp 69<br>βGlu 71<br>βGly 98<br>βAla 99<br>βGly 100<br>βAsn 101                                                                                                                                                                   | 201.4                                            | 99                              | γ-phosphate site of the guanosine nucleotide                                                         |

|      |       |                                                                        |                                                                                                                                                                                                                                                                                                                                                              |       |     |                                                          |
|------|-------|------------------------------------------------------------------------|--------------------------------------------------------------------------------------------------------------------------------------------------------------------------------------------------------------------------------------------------------------------------------------------------------------------------------------------------------------|-------|-----|----------------------------------------------------------|
|      |       |                                                                        | <b>βSer 140</b> (β-ns)<br>βGly 143<br>βGly 144<br>βThr 145<br>βGly 146                                                                                                                                                                                                                                                                                       |       |     |                                                          |
| βIII | 757.9 | βS4<br>βS5<br>βH5-S6<br>βS6<br>βH7<br>βT7<br>βH8<br>βS7<br>βS8<br>βS10 | βGln 136<br>βIle 165<br>βAsn 167<br>βPhe 169<br>βAsp 199<br>βGlu 200<br>βTyr 202<br>βGly 237<br>βVal 238<br>βThr 239<br>βThr 240<br>βCys 241<br>βLeu 242<br><b>βLeu 248</b> (βIV)<br>βAsn 249<br>βAsp 251<br>βLeu 252<br><b>βLeu 255</b> (βIV)<br>βAla 256<br><b>βMet 259</b> (βIV)<br>βVal 260<br>βPhe 268<br><b>βAla 316</b> (βIV)<br>βIle 318<br>βIle 378 | 302.1 | 100 | Part of the colchicine site                              |
| βIV  | 588.6 | βT7<br>βH8<br>βS8<br>βH10-S9<br>βS9                                    | <b>βLeu 248</b> (βIII)<br><b>βLeu 255</b> (βIII)<br>βAsn 258<br><b>βMet 259</b> (βIII)<br>βThr 314<br>βVal 315<br><b>βAla 316</b> (βIII)<br>βIle 347<br>βPro 348<br>βAsn 349<br>βAsn 350<br>βVal 351<br>βLys 352                                                                                                                                             | 137.0 | 70  | Part of the colchicine site<br><br>Equivalent to pID αVI |
| βV   | 912.8 | βH1<br>βS7<br>βM<br>βS8<br>βS9-S10                                     | <b>βLys 19</b> (βVI)<br>βVal 23<br>βGly 225<br>βAsn 228<br>βHis 229                                                                                                                                                                                                                                                                                          | 324.7 | 98  | Part of the taxane site                                  |

|       |       |                                    |                                                                                                                                                                                                                                                                                                                                      |       |    |                                                                                                                   |
|-------|-------|------------------------------------|--------------------------------------------------------------------------------------------------------------------------------------------------------------------------------------------------------------------------------------------------------------------------------------------------------------------------------------|-------|----|-------------------------------------------------------------------------------------------------------------------|
|       |       | βS10                               | βLeu 230<br>βSer 232<br>βAla 233<br>βSer 236<br>βGly 237<br>βPhe 272<br><b>βPro 274</b> (βXI)<br>βLeu 275<br><b>βThr 276</b> (βXI)<br>βSer 277<br>βArg 278<br>βGly 279<br>βSer 280<br><b>βGln 281</b> (βXI)<br>βGln 282<br>βTyr 283<br>βArg 320<br>βPro 360<br>βArg 369<br>βGly 370<br><b>βLeu 371</b> (βXI)<br>βSer 374<br>βThr 376 |       |    |                                                                                                                   |
| βVI   | 633.3 | βH1<br>βH2<br>βH2-S3               | <b>βGln 15</b> (β-ns)<br>βAla 18<br><b>βLys 19</b> (βV)<br>βGlu 22<br>βSer 77<br>βVal 78<br>βSer 80<br>βPro 82<br>βPhe 83<br>βGly 84                                                                                                                                                                                                 | 98.8  | 52 | Unknown pocket<br><br>Mediating communication<br>between β-ns and the taxane<br>site<br><br>Equivalent to pID αIV |
| βVII  | 230.0 | βH3<br>βH5<br>βH11-<br>H12<br>βH12 | βTrp 103<br>βTyr 108<br>βLeu 189<br>βHis 192<br>βGln 193<br>βMet 413<br>βGlu 417<br>βGlu 420<br>βAla 421                                                                                                                                                                                                                             | 83.4  | 32 | Unknown pocket                                                                                                    |
| βVIII | 673.9 | βH6<br>βH9-S8                      | βAla 208<br>βAsp 211<br>βIle 212<br>βArg 215<br>βThr 216<br><b>βSer 298</b> (βX)                                                                                                                                                                                                                                                     | 109.8 | 57 | Unknown pocket                                                                                                    |

|            |       |                                                                        |                                                                                                                                                                                                                                                                                                                                                          |       |    |                                                                                                                |
|------------|-------|------------------------------------------------------------------------|----------------------------------------------------------------------------------------------------------------------------------------------------------------------------------------------------------------------------------------------------------------------------------------------------------------------------------------------------------|-------|----|----------------------------------------------------------------------------------------------------------------|
|            |       |                                                                        | $\beta$ Lys 299<br><b><math>\beta</math>Met 301</b> ( $\beta$ X)<br>$\beta$ Ala 303<br>$\beta$ Ala 304<br>$\beta$ Cys 305                                                                                                                                                                                                                                |       |    |                                                                                                                |
| $\beta$ IX | 144.1 | $\beta$ T2<br>$\beta$ T3<br>$\beta$ H3                                 | $\beta$ Leu 70<br>$\beta$ Gly 95<br>$\beta$ Gln 96<br>$\beta$ Ser 97<br>$\beta$ Glu 110<br>$\beta$ Glu 113<br>$\beta$ Leu 114                                                                                                                                                                                                                            | 78.3  | 31 | Unknown pocket                                                                                                 |
| $\beta$ X  | 529.3 | $\beta$ S7<br>$\beta$ H9<br>$\beta$ H9-S8<br>$\beta$ S8<br>$\beta$ S10 | $\beta$ Met 269<br>$\beta$ Met 295<br>$\beta$ Phe 296<br>$\beta$ Asp 297<br><b><math>\beta</math>Ser 298</b> ( $\beta$ VIII)<br><b><math>\beta</math>Met 301</b> ( $\beta$ VIII)<br>$\beta$ Pro 307<br>$\beta$ Arg 308<br>$\beta$ Tyr 312<br>$\beta$ Phe 377                                                                                             | 123.6 | 46 | Part of the<br>laulimalide/peloruside site<br><br>Equivalent to pID $\alpha$ XI                                |
| $\beta$ XI | 753.6 | $\beta$ M<br>$\beta$ S9-S10<br>$\beta$ S10                             | <b><math>\beta</math>Pro 274</b> ( $\beta$ V)<br><b><math>\beta</math>Thr 276</b> ( $\beta$ V)<br><b><math>\beta</math>Gln 281</b> ( $\beta$ V)<br>$\beta$ Gln 282<br>$\beta$ Tyr 283<br>$\beta$ Arg 284<br>$\beta$ Ala 285<br>$\beta$ Leu 286<br>$\beta$ Gly 370<br><b><math>\beta</math>Leu 371</b> ( $\beta$ V)<br>$\beta$ Lys 372<br>$\beta$ Met 373 | 140.3 | 41 | Part of the taxane site                                                                                        |
| X1         | 441.4 | $\beta$ H9-S8<br>$\beta$ H11<br>$\beta$ H12                            | $\beta$ His 309<br>$\beta$ Gly 310<br>$\beta$ Ala 383<br>$\beta$ Gln 385<br>$\beta$ Glu 386<br>$\beta$ Gln 436<br>$\beta$ Thr 439                                                                                                                                                                                                                        | 113.2 | 31 | Most likely an artifact as it<br>involves the actual C-<br>terminus of the used $\beta$ -<br>tubulin structure |

**α-Tubulin**

| pID <sup>1</sup> | Max. volume <sup>2</sup><br>(Å <sup>3</sup> ) | SS <sup>3</sup>                                                                         | ResID <sup>4</sup><br>(p > 20 %)                                                                                                                                                                                                                                                                                                                                                                                                         | Average Volume <sup>5</sup><br>(Å <sup>3</sup> ) | Persistency <sup>6</sup><br>(%) | Note <sup>7</sup>                                                     |
|------------------|-----------------------------------------------|-----------------------------------------------------------------------------------------|------------------------------------------------------------------------------------------------------------------------------------------------------------------------------------------------------------------------------------------------------------------------------------------------------------------------------------------------------------------------------------------------------------------------------------------|--------------------------------------------------|---------------------------------|-----------------------------------------------------------------------|
| αI               | 936.0                                         | αS5<br>αT5<br>αH5<br>αS6<br>αH6<br>αH9-S8<br>αH11                                       | <b>αTyr 172</b> (α-ns)<br><b>αPro 173</b> (α-ns)<br><b>αAla 174</b> (α-ns)<br>αPro 175<br><b>αSer 178</b> (α-ns)<br><b>αAla 180</b> (α-ns)<br><b>αVal 181</b> (α-ns)<br>αGlu 183<br>αPro 184<br>αSer 187<br><b>αAsp 205</b> (αII)<br><b>αGlu 207</b> (αII)<br><b>αLys 304</b> (αII)<br><b>αCys 305</b> (αII)<br><b>αAla 387</b> (αII)<br><b>αArg 390</b> (αII)<br><b>αLeu 391</b> (αII)<br><b>αLys 394</b> (αII)<br>αLeu 397<br>αMet 398 | 246.6                                            | 86                              | Unknown pocket<br><br>Equivalent to pID βI<br><br>Merges with pID αII |
| α-ns             | 1020.4                                        | αH1<br>αS2<br>αT2<br>αH2<br>αT3<br>αS4<br>αT4<br>αH4<br>αS5<br>αT5<br>αH5<br>αH6<br>αH7 | αGly 10<br>αGln 11<br>αAla 12<br><b>αGln 15</b> (αIV)<br>αIle 16<br>αAsp 69<br>αGlu 71<br>αThr 73<br>αVal 74<br>αAsp 98<br>αAla 99<br>αAla 100<br>αAsn 101<br>αSer 140<br><b>αPhe 141</b> (αII)<br>αGly 142<br>αGly 143<br>αGly 144<br>αThr 145<br>αGly 146<br>αIle 171<br><b>αTyr 172</b> (αI)<br><b>αPro 173</b> (αI)                                                                                                                  | 519.6                                            | 100                             | Occupied with GTP                                                     |

|              |       |                                                                                                                                                     |                                                                                                                                                                                                                                                                                                                                                                                                                                                                                                                                                                                                                                                                                                                                                                                                                                                                                                                                                                                         |       |    |                            |
|--------------|-------|-----------------------------------------------------------------------------------------------------------------------------------------------------|-----------------------------------------------------------------------------------------------------------------------------------------------------------------------------------------------------------------------------------------------------------------------------------------------------------------------------------------------------------------------------------------------------------------------------------------------------------------------------------------------------------------------------------------------------------------------------------------------------------------------------------------------------------------------------------------------------------------------------------------------------------------------------------------------------------------------------------------------------------------------------------------------------------------------------------------------------------------------------------------|-------|----|----------------------------|
|              |       |                                                                                                                                                     | <b><math>\alpha</math>Ala 174</b> ( $\alpha$ I)<br>$\alpha$ Val 177<br><b><math>\alpha</math>Ser 178</b> ( $\alpha$ I)<br>$\alpha$ Thr 179<br><b><math>\alpha</math>Ala 180</b> ( $\alpha$ I)<br><b><math>\alpha</math>Glu 183</b> ( $\alpha$ I)<br>$\alpha$ Asn 206<br><b><math>\alpha</math>Tyr 224</b> ( $\alpha$ IV)<br>$\alpha$ Leu 227<br><b><math>\alpha</math>Asn 228</b> ( $\alpha$ IV)<br>$\alpha$ Ile 231                                                                                                                                                                                                                                                                                                                                                                                                                                                                                                                                                                    |       |    |                            |
| $\alpha$ II  | 945.1 | $\alpha$ T4<br>$\alpha$ S5<br>$\alpha$ S6<br>$\alpha$ H6<br>$\alpha$ H8-S7<br>$\alpha$ S7<br>$\alpha$ H9-S8<br>$\alpha$ S10-<br>H11<br>$\alpha$ H11 | <b><math>\alpha</math>Phe 141</b> ( $\alpha$ -ns)<br>$\alpha$ Tyr 172<br>$\alpha$ Met 203<br>$\alpha$ Val 204<br><b><math>\alpha</math>Asp 205</b> ( $\alpha$ I)<br><b><math>\alpha</math>Glu 207</b> ( $\alpha$ I)<br><b><math>\alpha</math>Phe 267</b> ( $\alpha$ III)<br>$\alpha$ Pro 268<br><b><math>\alpha</math>Leu 269</b> ( $\alpha$ XI)<br><b><math>\alpha</math>Ala 270</b> ( $\alpha$ XI)<br><b><math>\alpha</math>Val 303</b> ( $\alpha$ XI)<br><b><math>\alpha</math>Lys 304</b> ( $\alpha$ I)<br><b><math>\alpha</math>Cys 305</b> ( $\alpha$ I)<br>$\alpha$ Asp 306<br><b><math>\alpha</math>Pro 307</b> ( $\alpha$ XI)<br>$\alpha$ His 309<br>$\alpha$ Ala 383<br>$\alpha$ Ile 384<br>$\alpha$ Glu 386<br><b><math>\alpha</math>Ala 387</b> ( $\alpha$ I)<br><b><math>\alpha</math>Trp 388</b> ( $\alpha$ III)<br><b><math>\alpha</math>Arg 390</b> ( $\alpha$ I)<br><b><math>\alpha</math>Leu 391</b> ( $\alpha$ I)<br><b><math>\alpha</math>Lys 394</b> ( $\alpha$ I) | 327.7 | 77 | Merges with pID $\alpha$ I |
| $\alpha$ III | 924.9 | $\alpha$ H5<br>$\alpha$ H8-S7<br>$\alpha$ H11                                                                                                       | $\alpha$ Thr 191<br>$\alpha$ His 192<br>$\alpha$ Leu 195<br>$\alpha$ Glu 196<br>$\alpha$ Pro 263<br>$\alpha$ Arg 264<br>$\alpha$ His 266<br><b><math>\alpha</math>Phe 267</b> ( $\alpha$ II)<br><b><math>\alpha</math>Trp 388</b> ( $\alpha$ II)<br>$\alpha$ Asp 424<br>$\alpha$ Leu 428<br>$\alpha$ Tyr 432                                                                                                                                                                                                                                                                                                                                                                                                                                                                                                                                                                                                                                                                            | 125.3 | 62 | Unknown pocket             |
| $\alpha$ IV  | 541.4 | $\alpha$ H1                                                                                                                                         | <b><math>\alpha</math>Gln 15</b> ( $\alpha$ -ns)                                                                                                                                                                                                                                                                                                                                                                                                                                                                                                                                                                                                                                                                                                                                                                                                                                                                                                                                        | 148.2 | 69 | Unknown pocket             |

|              |       |                                                                                |                                                                                                                                                                                                                                                                                                                                                                                                       |       |    |                                                                    |
|--------------|-------|--------------------------------------------------------------------------------|-------------------------------------------------------------------------------------------------------------------------------------------------------------------------------------------------------------------------------------------------------------------------------------------------------------------------------------------------------------------------------------------------------|-------|----|--------------------------------------------------------------------|
|              |       | $\alpha$ H2<br>$\alpha$ H2-S3<br>$\alpha$ H7                                   | $\alpha$ Asn 18<br>$\alpha$ Ala 19<br><b><math>\alpha</math>Glu 22</b> ( $\alpha$ X)<br>$\alpha$ Glu 77<br>$\alpha$ Val 78<br>$\alpha$ Thr 82<br><b><math>\alpha</math>Tyr 83</b> ( $\alpha$ X)<br><b><math>\alpha</math>Tyr 224</b> ( $\alpha$ -ns)<br><b><math>\alpha</math>Thr 225</b> ( $\alpha$ -ns)<br>$\alpha$ Asn 228<br>$\alpha$ Arg 229                                                     |       |    | Equivalent to pID $\beta$ VI<br><br>Communicates with $\alpha$ -ns |
| $\alpha$ V   | 649.6 | $\alpha$ M<br>$\alpha$ S9-S10<br>$\alpha$ S10                                  | <b><math>\alpha</math>Pro 274</b> ( $\alpha$ IX)<br><b>alle 276</b> ( $\alpha$ XII)<br>$\alpha$ Lys 280<br>$\alpha$ Ala 281<br>$\alpha$ Tyr 282<br>$\alpha$ His 283<br>$\alpha$ Glu 284<br>$\alpha$ Gln 285<br>$\alpha$ Leu 286<br><b><math>\alpha</math>Ala 369</b> ( $\alpha$ XII)<br>$\alpha$ Lys 370<br><b><math>\alpha</math>Val 371</b> ( $\alpha$ XII)<br>$\alpha$ Gln 372<br>$\alpha$ Arg 373 | 136.6 | 51 | Unknown pocket<br><br>Communicates with pID $\alpha$ XII           |
| $\alpha$ VI  | 496.7 | $\alpha$ H8<br>$\alpha$ H8-S7<br>$\alpha$ S8<br>$\alpha$ H10-S9<br>$\alpha$ S9 | $\alpha$ Asn 258<br>$\alpha$ Pro 261<br>$\alpha$ Met 313<br>$\alpha$ Ala 314<br>$\alpha$ Cys 315<br>$\alpha$ Phe 343<br>$\alpha$ Cys 347<br>$\alpha$ Pro 348<br>$\alpha$ Gly 350<br>$\alpha$ Phe 351<br>$\alpha$ Lys 352                                                                                                                                                                              | 115.4 | 52 | Unknown pocket<br><br>Equivalent to pID $\beta$ IV                 |
| $\alpha$ VII | 507.0 | $\alpha$ H1-S2<br>$\alpha$ H2-S3<br>$\alpha$ H3                                | $\alpha$ Ser 54<br>$\alpha$ Glu 55<br>$\alpha$ Thr 56<br>$\alpha$ Val 62<br>$\alpha$ Pro 63<br>$\alpha$ Arg 64<br>$\alpha$ His 88<br>$\alpha$ Glu 90<br>$\alpha$ Gln 91<br>$\alpha$ Arg 121<br>$\alpha$ Lys 124<br>$\alpha$ Leu 125                                                                                                                                                                   | 154.2 | 85 | Unknown pocket                                                     |



|               |       |                                                                                 |                                                                                                                                                                                                                                                                                                                                                                              |       |    |                                                                                   |
|---------------|-------|---------------------------------------------------------------------------------|------------------------------------------------------------------------------------------------------------------------------------------------------------------------------------------------------------------------------------------------------------------------------------------------------------------------------------------------------------------------------|-------|----|-----------------------------------------------------------------------------------|
|               |       |                                                                                 | $\alpha$ Gln 128                                                                                                                                                                                                                                                                                                                                                             |       |    |                                                                                   |
| $\alpha$ VIII | 744.8 | $\alpha$ H1<br>$\alpha$ H1-H1'<br>$\alpha$ H7<br>$\alpha$ S8<br>$\alpha$ S9-S10 | <b><math>\alpha</math>Leu 26</b> ( $\alpha$ X)<br>$\alpha$ Glu 27<br>$\alpha$ Thr 41<br>$\alpha$ lle 42<br>$\alpha$ Gly 43<br>$\alpha$ Gly 44<br>$\alpha$ Phe 244<br>$\alpha$ Arg 320<br>$\alpha$ Gln 358<br>$\alpha$ Pro 359<br>$\alpha$ Pro 360<br>$\alpha$ Thr 361<br>$\alpha$ Lys 370                                                                                    | 162.8 | 51 | Unknown pocket                                                                    |
| $\alpha$ IX   | 439.8 | $\alpha$ H6<br>$\alpha$ S7<br>$\alpha$ M<br>$\alpha$ H9<br>$\alpha$ H9-S8       | $\alpha$ lle 212<br>$\alpha$ Asn 216<br>$\alpha$ Tyr 272<br>$\alpha$ Ala 273<br><b><math>\alpha</math>Pro 274</b> ( $\alpha$ V)<br>$\alpha$ Val 275<br>$\alpha$ Ala 294<br>$\alpha$ Asn 300                                                                                                                                                                                  | 100.9 | 30 | Unknown pocket                                                                    |
| $\alpha$ X    | 508.9 | $\alpha$ H1<br>$\alpha$ H1-H1'<br>$\alpha$ H2-S3<br>$\alpha$ S9-S10             | <b><math>\alpha</math>Glu 22</b> ( $\alpha$ IV)<br>$\alpha$ Cys 25<br><b><math>\alpha</math>Leu 26</b> ( $\alpha$ VIII)<br>$\alpha$ lle 30<br>$\alpha$ Gln 31<br>$\alpha$ Pro 32<br><b><math>\alpha</math>Tyr 83</b> ( $\alpha$ IV)<br>$\alpha$ Pro 364                                                                                                                      | 122.8 | 30 | Unknown pocket                                                                    |
| $\alpha$ XI   | 689.0 | $\alpha$ S7<br>$\alpha$ H9<br>$\alpha$ H9-S8<br>$\alpha$ S8<br>$\alpha$ S10     | <b><math>\alpha</math>Leu 269</b> ( $\alpha$ II)<br><b><math>\alpha</math>Ala 270</b> ( $\alpha$ II)<br>$\alpha$ Thr 271<br>$\alpha$ Cys 295<br>$\alpha$ Phe 296<br>$\alpha$ Gln 301<br><b><math>\alpha</math>Val 303</b> ( $\alpha$ II)<br><b><math>\alpha</math>Pro 307</b> ( $\alpha$ II)<br>$\alpha$ Arg 308<br>$\alpha$ Tyr 312<br>$\alpha$ Met 377<br>$\alpha$ Ser 379 | 114.6 | 51 | Unknown pocket<br>Equivalent to pID $\beta$ X                                     |
| $\alpha$ XII  | 392.5 | $\alpha$ H7<br>$\alpha$ S7<br>$\alpha$ M<br>$\alpha$ S9-S10                     | $\alpha$ Gln 233<br>$\alpha$ Tyr 272<br>$\alpha$ Pro 274<br>$\alpha$ Val 275<br><b><math>\alpha</math>lle 276</b> ( $\alpha$ V)                                                                                                                                                                                                                                              | 80.0  | 32 | Unknown pocket<br>Equivalent to pID $\beta$ V<br>Communicates with pID $\alpha$ V |

|  |  |  |                                                                                                                                                                                    |  |  |  |
|--|--|--|------------------------------------------------------------------------------------------------------------------------------------------------------------------------------------|--|--|--|
|  |  |  | $\alpha$ Pro 360<br>$\alpha$ Thr 361<br>$\alpha$ Val 362<br>$\alpha$ Leu 368<br><b><math>\alpha</math>Ala 369</b> ( $\alpha$ V)<br><b><math>\alpha</math>Val 371</b> ( $\alpha$ V) |  |  |  |
|--|--|--|------------------------------------------------------------------------------------------------------------------------------------------------------------------------------------|--|--|--|

<sup>1</sup>Pocket identifiers. ns, nucleotide site.

<sup>2</sup>Maximal pocket volume during the simulation.

<sup>3</sup>Secondary structural elements involved in pocket formation.

<sup>4</sup>Residues involved in pocket formation in >20 % of the time during the simulation. Residues involved in a pocket communication network are highlighted in bold; the adjacent pocket that shares the same residue is given in parenthesis.

<sup>5</sup>Average pocket volume during the simulation.

<sup>6</sup>Persistency of the pocket during the simulation.

**Table S3. Tubulin fragment-binding sites identified by X-ray crystallography.**

**β-Tubulin**

| sID <sup>1</sup> | SS <sup>2</sup>                                              | ResID <sup>3</sup>                                                                                                                                                             | Fragment ID <sup>4</sup>                           | V <sub>r</sub> <sup>5</sup><br>(Å <sup>3</sup> ) | PDB ID <sup>6</sup>                                                  | Notes                                                                                                                                                                                       |
|------------------|--------------------------------------------------------------|--------------------------------------------------------------------------------------------------------------------------------------------------------------------------------|----------------------------------------------------|--------------------------------------------------|----------------------------------------------------------------------|---------------------------------------------------------------------------------------------------------------------------------------------------------------------------------------------|
| βI               | βH6<br>βH9<br>βH9-βS8                                        | βAsp 211<br>βIle 212<br>βArg 215<br>βThr 216<br>βLys 218<br>βSer 298<br>βLys 299                                                                                               | 01<br>53                                           | 173                                              | 5S4L<br>5S61                                                         | Unknown ligand-binding site<br><br>Residue substitutions in human β-tubulin isotypes: β2a/β2b, A298S; β1/β6, K299R; β8, R215K                                                               |
| βII              | βH1<br>βH7<br>βS7<br>βM<br>βS8<br>βS9-βS10<br>βS10           | βVal 23<br>βGlu 27<br>βHis 229<br>βAla 233<br>βThr 234<br>βSer 236<br>βGly 237<br>βPhe 272<br>βPro 274<br>βArg 320<br>βPro 360<br>βArg 369<br>βLeu 371<br>βSer 374<br>βThr 376 | 02<br>03                                           | 207                                              | 5S4M<br>5S4N                                                         | Taxane site<br><br>Residue substitutions in human β-tubulin isotypes: β1, V23M, A233L, A374S; β4a/β5/β6, S374A                                                                              |
| βIII             | βN-ter<br>βH1'<br>βT7                                        | αThr 73<br>βMet 1<br>βLeu 46<br>βGlu 47<br>βArg 48<br>βIle 49<br>βAsn 50<br>βVal 51<br>βAla 250<br>βAsp 251                                                                    | 04                                                 | 179                                              | 5S4O                                                                 | Unknown ligand-binding site<br><br>Residue substitutions in human β-tubulin isotypes: β5, E47D, N50S                                                                                        |
| βIV              | αT5<br>βS1<br>βH1'<br>βS4<br>βS5<br>βS6<br>βH7<br>βT7<br>βH8 | αThr 179<br>αAla 180<br>αVal 181<br>βIle 4<br>βTyr 52<br>βGln 136<br>βAsn 167<br>βPhe 169<br>βGlu 200                                                                          | 03<br>05<br>06<br>07<br>08<br>09<br>10<br>11<br>12 | 780                                              | 5S4N<br>5S4P<br>5S4Q<br>5S4R<br>5S4S<br>5S4T<br>5S4U<br>5S4V<br>5S4W | Colchicine site<br><br>Residue substitutions in human β-tubulin isotypes: β1, E200A, Y202F, V238I, C241S, A317C, V318I, T353V; β2a/β2b, V318I; β3/β6, C241S, A317T, T353V; β8, Y202F, V318I |

|    |                                                                           |                                                                                                                                                                                                                                                                                  |                                              |     |                                                              |                                                                                                                                                                         |
|----|---------------------------------------------------------------------------|----------------------------------------------------------------------------------------------------------------------------------------------------------------------------------------------------------------------------------------------------------------------------------|----------------------------------------------|-----|--------------------------------------------------------------|-------------------------------------------------------------------------------------------------------------------------------------------------------------------------|
|    | βS8<br>βS9<br>βS10                                                        | βTyr 202<br>βVal 238<br>βThr 239<br>βCys 241<br>βLeu 242<br>βGln 247<br>βLeu 248<br>βAsn 249<br>βAla 250<br>βLeu 252<br>βLeu 255<br>βAla 256<br>βAsn 258<br>βMet 259<br>βPhe 268<br>βAla 316<br>βAla 317<br>βIle 318<br>βAsn 350<br>βLys 352<br>βThr 353<br>βAla 354<br>βIle 378 | 13<br>14<br>15<br>16<br>17<br>18<br>19       |     | 5S4X<br>5S4Y<br>5S4Z<br>5S50<br>5S51<br>5S52<br>5S53         |                                                                                                                                                                         |
| βV | αH11'<br>βS4<br>βH4<br>βH4-βS5<br>βS5<br>βH5<br>βH5-βS6<br>βH8<br>βH8-βS7 | αHis 406<br>αVal 409<br>αGly 410<br>αGlu 411<br>βPhe 135<br>βIle 154<br>βIle 157<br>βArg 158<br>βTyr 161<br>βPro 162<br>βAsp 163<br>βArg 164<br>βIle 165<br>βMet 166<br>βVal 195<br>βGlu 196<br>βAsn 197<br>βThr 198<br>βAsp 199<br>βArg 253<br>βPro 263<br>βArg 264<br>βHis 266 | 14<br>20<br>21<br>22<br>23<br>24<br>25<br>26 | 669 | 5S4Y<br>5S54<br>5S55<br>5S56<br>5S57<br>5S58<br>5S59<br>5S5A | Unknown ligand-binding site<br><br>Residue substitutions in human β-tubulin isotypes: β1, I154L, V195I, T198A; β3, I157V; β4a/β6, Y161F; β8, I154M, M166I, V195I, T198A |

### **β1α2-Tubulin**

| sID <sup>1</sup> | SS <sup>2</sup> | ResID <sup>3</sup> | Fragment ID <sup>4</sup> | V <sub>f</sub> <sup>5</sup><br>(Å <sup>3</sup> ) | PDB ID <sup>6</sup> | Notes                                                                                                                                                    |
|------------------|-----------------|--------------------|--------------------------|--------------------------------------------------|---------------------|----------------------------------------------------------------------------------------------------------------------------------------------------------|
| βαI              | αH8-αS7         | αTyr 262           | 27                       | 511                                              | 5S5B                | Unknown ligand-binding site<br><br>Residue substitution in human β-tubulin isotypes: β1, R400K                                                           |
|                  | αH12            | αPro 263           | 28                       |                                                  | 5S5C                |                                                                                                                                                          |
|                  | βH11-βH11'      | αArg 264           | 29                       |                                                  | 5S5D                |                                                                                                                                                          |
|                  |                 | αIle 265           |                          |                                                  |                     |                                                                                                                                                          |
|                  | αAsp 431        |                    |                          |                                                  |                     |                                                                                                                                                          |
|                  | αGlu 434        |                    |                          |                                                  |                     |                                                                                                                                                          |
|                  | αVal 435        |                    |                          |                                                  |                     |                                                                                                                                                          |
|                  | βArg 400        |                    |                          |                                                  |                     |                                                                                                                                                          |
|                  | βArg 401        |                    |                          |                                                  |                     |                                                                                                                                                          |
|                  | βLys 402        |                    |                          |                                                  |                     |                                                                                                                                                          |
| βαII             | αH3-S4          | αCys 4             | 04                       | 632                                              | 5S4O                | Unknown ligand-binding site<br><br>Located between the maytansine and pironetin sites<br><br>Residue substitution in human β-tubulin isotypes: β6, Y408F |
|                  | αS4             | αGln 133           | 11                       |                                                  | 5S4V                |                                                                                                                                                          |
|                  | αH4-αS5         | αGly 134           | 30                       |                                                  | 5S5E                |                                                                                                                                                          |
|                  | αS6             | αPhe 135           | 31                       |                                                  | 5S5F                |                                                                                                                                                          |
|                  | αH8             | αLeu 136           | 32                       |                                                  | 5S5G                |                                                                                                                                                          |
|                  | βT3             | αSer 165           | 33                       |                                                  | 5S5H                |                                                                                                                                                          |
|                  | βH3'            | αLeu 167           | 34                       |                                                  | 5S5I                |                                                                                                                                                          |
|                  | βT5             | αAsp 199           | 35                       |                                                  | 5S5J                |                                                                                                                                                          |
|                  | βH11'           | αCys 200           | 36                       |                                                  | 5S5K                |                                                                                                                                                          |
|                  |                 | αPhe 202           | 37                       |                                                  | 5S5L                |                                                                                                                                                          |
|                  |                 | αLeu 242           | 38                       |                                                  | 5S5M                |                                                                                                                                                          |
|                  |                 | αLeu 252           | 39                       |                                                  | 5S5N                |                                                                                                                                                          |
|                  |                 | αThr 253           | 40                       |                                                  | 5S5O                |                                                                                                                                                          |
|                  |                 | αGln 256           | 41                       |                                                  | 5S5P                |                                                                                                                                                          |
|                  |                 | αThr 257           | 42                       |                                                  | 5S5Q                |                                                                                                                                                          |
|                  |                 | αLeu 259           | 43                       |                                                  | 5S5R                |                                                                                                                                                          |
|                  |                 | βGly 100           |                          |                                                  |                     |                                                                                                                                                          |
|                  |                 | βAsn 101           |                          |                                                  |                     |                                                                                                                                                          |
|                  |                 | βAsn 102           |                          |                                                  |                     |                                                                                                                                                          |
|                  |                 | βLys 105           |                          |                                                  |                     |                                                                                                                                                          |
|                  | βVal 182        |                    |                          |                                                  |                     |                                                                                                                                                          |
|                  | βTrp 407        |                    |                          |                                                  |                     |                                                                                                                                                          |
|                  | βTyr 408        |                    |                          |                                                  |                     |                                                                                                                                                          |
|                  | βGlu 411        |                    |                          |                                                  |                     |                                                                                                                                                          |
| βαIII            | αT7             | αLeu 248           | 03                       | 1139                                             | 5S4N                | Vinblastine site<br><br>Residue substitution in human β-tubulin isotypes: β1, Q394H                                                                      |
|                  | αH8             | αVal 250           | 05                       |                                                  | 5S4P                |                                                                                                                                                          |
|                  | αH10            | αAsn 258           | 07                       |                                                  | 5S4R                |                                                                                                                                                          |
|                  | αH10-αS9        | αPro 325           | 15                       |                                                  | 5S4Z                |                                                                                                                                                          |
|                  | αS9             | αVal 328           | 22                       |                                                  | 5S56                |                                                                                                                                                          |
|                  | βT5             | αAsn 329           | 26                       |                                                  | 5S5A                |                                                                                                                                                          |
|                  | βH5             | αIle 332           | 29                       |                                                  | 5S5D                |                                                                                                                                                          |
|                  | βH6             | αPro 348           | 30                       |                                                  | 5S5E                |                                                                                                                                                          |
|                  | βH6-βH7         | αGly 350           | 38                       |                                                  | 5S5M                |                                                                                                                                                          |
|                  | βH7             | αPhe 351           | 44                       |                                                  | 5S5S                |                                                                                                                                                          |

|          |      |          |    |  |      |  |
|----------|------|----------|----|--|------|--|
|          | βH11 | αLys 352 | 45 |  | 5S5T |  |
|          |      | αVal 353 | 46 |  | 5S5U |  |
|          |      | αGly 354 | 47 |  | 5S5V |  |
|          |      | αIle 355 | 48 |  | 5S5W |  |
|          |      | βPro 173 | 49 |  | 5S5X |  |
|          |      | βSer 174 | 50 |  | 5S5Y |  |
|          |      | βPro 175 | 51 |  | 5S5Z |  |
|          |      | βLys 176 | 52 |  | 5S60 |  |
|          |      | βVal 177 | 53 |  | 5S61 |  |
|          |      | βSer 178 | 54 |  | 5S62 |  |
|          |      | βAsp 179 | 55 |  | 5S63 |  |
|          |      | βThr 180 | 56 |  | 5S64 |  |
|          |      | βVal 181 |    |  |      |  |
|          |      | βGlu 183 |    |  |      |  |
|          |      | βPro 184 |    |  |      |  |
|          |      | βTyr 210 |    |  |      |  |
|          |      | βThr 221 |    |  |      |  |
|          |      | βPro 222 |    |  |      |  |
|          |      | βThr 223 |    |  |      |  |
|          |      | βTyr 224 |    |  |      |  |
| βLeu 227 |      |          |    |  |      |  |
| βGln 394 |      |          |    |  |      |  |

### α-Tubulin

| sID <sup>1</sup> | SS <sup>2</sup>              | ResID <sup>3</sup>                                                                                                    | Fragment ID <sup>4</sup> | V <sub>f</sub> <sup>5</sup><br>(Å <sup>3</sup> ) | PDB ID <sup>6</sup>  | Notes                                                                                                  |
|------------------|------------------------------|-----------------------------------------------------------------------------------------------------------------------|--------------------------|--------------------------------------------------|----------------------|--------------------------------------------------------------------------------------------------------|
| αI               | αH6<br>αM<br>αH9             | αArg 215<br>αAsn 216<br>αPro 274<br>αVal 275<br>αLys 280<br>αLeu 286<br>αAla 294                                      | 05                       | 185                                              | 5S4P                 | Unknown ligand-binding site<br><br>Residue substitutions in human α-tubulin isotypes: α8, V275I, A294S |
| αII              | αH1<br>αH2<br>αH2-αS3<br>αH7 | αGln 15<br>αAsn 18<br>αAla 19<br>αTrp 21<br>αGlu 22<br>αGlu 77<br>αVal 78<br>αGly 81<br>αThr 82<br>αTyr 83<br>αPhe 87 | 02<br>25<br>53           | 364                                              | 5S4M<br>5S59<br>5S61 | Unknown ligand-binding site<br><br>Residue substitutions in human α-tubulin isotypes: α4a, V78I, T82P  |

|  |  |                                  |  |  |  |  |
|--|--|----------------------------------|--|--|--|--|
|  |  | αThr 225<br>αAsn 228<br>αArg 229 |  |  |  |  |
|--|--|----------------------------------|--|--|--|--|

### Crystal contact/binding partner of T<sub>2</sub>R-TTL

| sID <sup>1</sup> | SS <sup>2</sup>         | ResID <sup>3</sup>                                                                                       | Fragment ID <sup>4</sup> | V <sub>f</sub> <sup>5</sup><br>(Å <sup>3</sup> ) | PDB ID <sup>6</sup>  | Notes                                                                      |
|------------------|-------------------------|----------------------------------------------------------------------------------------------------------|--------------------------|--------------------------------------------------|----------------------|----------------------------------------------------------------------------|
| X1               | αH1-αS2                 | αThr 41<br>αIle 42<br>αGly 43<br>αGly 44<br>αGly 45<br>αAsp 46                                           | 26<br>39<br>57           | -                                                | 5S5A<br>5S5N<br>5S65 | Site involving a crystal contact formed by a neighboring α-tubulin monomer |
| X2               | αH2- αS3<br>αH3         | αHis 88<br>αGlu 90<br>αGln 91<br>αArg 121<br>αLys 124<br>αLeu 125                                        | 05                       | -                                                | 5S4P                 | Site involving a crystal contact formed by a neighboring TTL molecule      |
| X3               | αH4-αS5<br>αH5<br>βH11' | αSer 158<br>αGly 162<br>αLys 163<br>αLys 166<br>αGlu 196<br>αHis 197<br>αSer 198<br>αAsp 199<br>βGly 410 | 58<br>59                 | -                                                | 5S66<br>5S67         | Site involving residues of RB3                                             |

<sup>1</sup>Fragment site identifiers. X1, X2 and X3 refer to sites that involve either a crystal contact (X1 and X2) or a tubulin-binding partner of the T<sub>2</sub>R-TTL complex (X3).

<sup>2</sup>Secondary structural elements involved in site formation.

<sup>3</sup>Residues that are in contact with the identified fragments (maximal distance of 4 Å).

<sup>4</sup>Fragment ID according to the deposited structures in the RCSB Protein Data Bank.

<sup>5</sup>Total fragment volume.

<sup>6</sup>PDB IDs for the deposited structures in the RCSB Protein Data Bank.

**Table S4. Contact points of tubulin dimers in the microtubule lattice that overlap with predicted pockets or fragment sites.**

**$\beta$ 1 $\alpha$ 2-Tubulin**

| pID/sID <sup>1</sup>                                 | ResID <sup>2</sup>                                                                                                                                                                                                                                                                                                                                                                                                                                             | Secondary structural elements involved <sup>3</sup>                                   |
|------------------------------------------------------|----------------------------------------------------------------------------------------------------------------------------------------------------------------------------------------------------------------------------------------------------------------------------------------------------------------------------------------------------------------------------------------------------------------------------------------------------------------|---------------------------------------------------------------------------------------|
| sID $\beta\alpha$ I <sup><math>\alpha</math></sup>   | $\alpha$ Cys 4<br>$\alpha$ Gln 133<br>$\alpha$ Gly 134<br>$\alpha$ Phe 135<br>$\alpha$ Leu 136<br>$\alpha$ Ser 165<br>$\alpha$ Leu 167<br>$\alpha$ Asp 199<br>$\alpha$ Cys 200<br>$\alpha$ Phe 202<br>$\alpha$ Leu 242<br>$\alpha$ Leu 252<br><b><math>\alpha</math>Thr 253</b><br><b><math>\alpha</math>Gln 256</b><br><b><math>\alpha</math>Thr 257</b><br>$\alpha$ Leu 259                                                                                  | $\beta$ T3 and $\beta$ H3' (longitudinal inter-tubulin dimer contact in microtubules) |
| sID $\beta\alpha$ II <sup><math>\beta</math></sup>   | <b><math>\beta</math>Gly 100</b><br><b><math>\beta</math>Asn 101</b><br>$\beta$ Asn 102<br>$\beta$ Lys 105<br><b><math>\beta</math>Val 182</b><br><b><math>\beta</math>Trp 407</b><br>$\beta$ Tyr 408<br>$\beta$ Glu 411                                                                                                                                                                                                                                       | $\alpha$ H8 (longitudinal inter-tubulin dimer contact in microtubules)                |
| sID $\beta\alpha$ III <sup><math>\alpha</math></sup> | <b><math>\alpha</math>Leu 248</b><br>$\alpha$ Val 250<br><b><math>\alpha</math>Asn 258</b><br><b><math>\alpha</math>Pro 325</b><br><b><math>\alpha</math>Val 328</b><br><b><math>\alpha</math>Asn 329</b><br>$\alpha$ Ile 332<br><b><math>\alpha</math>Pro 348</b><br><b><math>\alpha</math>Gly 350</b><br><b><math>\alpha</math>Phe 351</b><br><b><math>\alpha</math>Lys 352</b><br><b><math>\alpha</math>Val 353</b><br>$\alpha$ Gly 354<br>$\alpha$ Ile 355 | $\beta$ T5 (longitudinal inter-tubulin dimer contact in microtubules)                 |



|                                   |                                                                                                                                                                                                                                                                                                                                                                                                                                                                                                                              |                                                                                                                          |
|-----------------------------------|------------------------------------------------------------------------------------------------------------------------------------------------------------------------------------------------------------------------------------------------------------------------------------------------------------------------------------------------------------------------------------------------------------------------------------------------------------------------------------------------------------------------------|--------------------------------------------------------------------------------------------------------------------------|
| siD $\beta\alpha\text{III}^\beta$ | $\beta$ Pro 173<br>$\beta$ Ser 174<br>$\beta$ Pro 175<br><b><math>\beta</math>Lys 176</b><br><b><math>\beta</math>Val 177</b><br><b><math>\beta</math>Ser 178</b><br><b><math>\beta</math>Asp 179</b><br><b><math>\beta</math>Thr 180</b><br><b><math>\beta</math>Val 181</b><br>$\beta$ Glu 183<br><b><math>\beta</math>Pro 184</b><br>$\beta$ Tyr 210<br><b><math>\beta</math>Thr 221</b><br><b><math>\beta</math>Pro 222</b><br>$\beta$ Thr 223<br><b><math>\beta</math>Tyr 224</b><br>$\beta$ Leu 227<br>$\beta$ Gln 394 | $\alpha$ H10, $\alpha$ H10- $\alpha$ S9 loop, and $\alpha$ S9 (longitudinal inter-tubulin dimer contact in microtubules) |
|-----------------------------------|------------------------------------------------------------------------------------------------------------------------------------------------------------------------------------------------------------------------------------------------------------------------------------------------------------------------------------------------------------------------------------------------------------------------------------------------------------------------------------------------------------------------------|--------------------------------------------------------------------------------------------------------------------------|

### $\alpha$ -Tubulin

| pID/siD <sup>1</sup> | ResID <sup>2</sup>                                                                                                                                                                                                                                                                                                                                                                                                                                                                                                                                                    | Secondary structural elements involved <sup>3</sup>                            |
|----------------------|-----------------------------------------------------------------------------------------------------------------------------------------------------------------------------------------------------------------------------------------------------------------------------------------------------------------------------------------------------------------------------------------------------------------------------------------------------------------------------------------------------------------------------------------------------------------------|--------------------------------------------------------------------------------|
| pID $\alpha$ I       | $\alpha$ Tyr 172<br>$\alpha$ Pro 173<br>$\alpha$ Ala 174<br><b><math>\alpha</math>Pro 175</b><br><b><math>\alpha</math>Ser 178</b><br><b><math>\alpha</math>Ala 180</b><br><b><math>\alpha</math>Val 181</b><br><b><math>\alpha</math>Glu 183</b><br>$\alpha$ Pro 184<br>$\alpha$ Ser 187<br>$\alpha$ Asp 205<br><b><math>\alpha</math>Glu 207</b><br>$\alpha$ Lys 304<br>$\alpha$ Cys 305<br>$\alpha$ Ala 387<br>$\alpha$ Arg 390<br>$\alpha$ Leu 391<br><b><math>\alpha</math>Lys 394</b><br><b><math>\alpha</math>Leu 397</b><br><b><math>\alpha</math>Met 398</b> | $\beta$ H10- $\beta$ S9 loop (longitudinal intra-tubulin dimer contact)        |
| pID $\alpha$ VII     | <b><math>\alpha</math>Ser 54</b><br><b><math>\alpha</math>Glu 55</b><br><b><math>\alpha</math>Thr 56</b>                                                                                                                                                                                                                                                                                                                                                                                                                                                              | Adjacent $\alpha$ M-loop (lateral inter-tubulin dimer contact in microtubules) |

|  |                                                                                                                                                                                                                                                                                                      |  |
|--|------------------------------------------------------------------------------------------------------------------------------------------------------------------------------------------------------------------------------------------------------------------------------------------------------|--|
|  | <b><math>\alpha</math>Val 62</b><br>$\alpha$ Pro 63<br>$\alpha$ Arg 64<br><b><math>\alpha</math>His 88</b><br><b><math>\alpha</math>Glu 90</b><br>$\alpha$ Gln 91<br><b><math>\alpha</math>Arg 121</b><br><b><math>\alpha</math>Lys 124</b><br>$\alpha$ Leu 125<br><b><math>\alpha</math>Gln 128</b> |  |
|--|------------------------------------------------------------------------------------------------------------------------------------------------------------------------------------------------------------------------------------------------------------------------------------------------------|--|

<sup>1</sup>Pocket and site identifiers. Fragment sites that are located at the  $\beta$ Tub1- $\alpha$ Tub2 inter-dimer interface in the T<sub>2</sub>R-TTL complex and thus represent composite sites are considered separately as half sites; they are indicated with “ $\alpha$ ” and “ $\beta$ ” superscripts to denote whether they belong to  $\alpha$ - or  $\beta$ -tubulin, respectively.

<sup>2</sup>Tubulin residues that are involved in pocket or site formation (taken from Table S1 and Table S3). Residues that are shared between a pocket or a site and an adjacent tubulin chain within the tubulin dimer or in the microtubule lattice (maximal distance of 4 Å) are shown in italic for unassembled “curved” tubulin and in bold for assembled “straight” tubulin. Residues that are shared between a pocket or a site independent of the conformational state of tubulin are shown in both bold and italic.

<sup>3</sup>Secondary structural elements of the contacting tubulin monomer involved in interaction with residues forming a pocket or a site.

The Protein Data Bank ID of the microtubule structure that was used for the analysis is PDB ID 3JAR.

**Table S5. Contact points of protein partners that overlap with predicted pockets or fragment sites in tubulin.**

**β-Tubulin**

| sID/pID <sup>1</sup> | ResID <sup>2</sup>                                                                                                                                                                                                                                                                                                                                                                 | Protein <sup>3</sup>                                                       | Structural element involved <sup>4</sup>                                      |
|----------------------|------------------------------------------------------------------------------------------------------------------------------------------------------------------------------------------------------------------------------------------------------------------------------------------------------------------------------------------------------------------------------------|----------------------------------------------------------------------------|-------------------------------------------------------------------------------|
| sID βI               | βAsp 211<br>βIle 212<br><b>βArg 215</b><br>βThr 216<br><b>βSer 298</b><br><b>βLys 299</b>                                                                                                                                                                                                                                                                                          | Targeting protein for Xklp2 (TPX2)<br><br>PDB ID: 6BJC                     | C-terminal unstructured part of the wedge domain<br><br>Binds also to sID βαI |
| sID βV               | <b>αHis 406</b><br><b>αVal 409</b><br><b>αGly 410</b><br><b>αGlu 411</b><br>βPhe 135<br>βIle 154<br>βIle 157<br><b>βArg 158</b><br>βTyr 161<br><b>βPro 162</b><br><b>βAsp 163</b><br>βArg 164<br>βIle 165<br>βMet 166<br><b>βVal 195</b><br><b>βGlu 196</b><br><b>βAsn 197</b><br>βThr 198<br><b>βAsp 199</b><br>βArg 253<br><b>βPro 263</b><br><b>βArg 264</b><br><b>βHis 266</b> | Cytoplasmic dynein 1 heavy chain<br><br>PDB ID: 3J1U, 3J1T, 6RZA, 6RZB     | Helix 1 of the microtubule-binding domain                                     |
| sID βV               | <i>αHis 406</i><br><i>αVal 409</i><br><i>αGly 410</i><br>αGlu 411<br>βPhe 135<br>βIle 154<br>βIle 157<br><i>βArg 158</i><br>βTyr 161<br>βPro 162<br>βAsp 163<br>βArg 164                                                                                                                                                                                                           | Centrosomal P4.1-associated protein (CPAP/SAS-4)<br><br>PDB ID: 5ITZ, 5EIB | Helical SAC region of the N-terminal PN2-3 domain                             |

|  |                                                                                                                                                |  |  |
|--|------------------------------------------------------------------------------------------------------------------------------------------------|--|--|
|  | βIle 165<br>βMet 166<br>βVal 195<br><i>βGlu 196</i><br>βAsn 197<br>βThr 198<br>βAsp 199<br>βArg 253<br><i>βPro 263</i><br>βArg 264<br>βHis 266 |  |  |
|--|------------------------------------------------------------------------------------------------------------------------------------------------|--|--|

### **β1α2-Tubulin**

| sID/pID <sup>1</sup> | ResID <sup>2</sup>                                                                                                                                                                         | Protein <sup>3</sup>                                   | Structural element involved <sup>4</sup>                                     |
|----------------------|--------------------------------------------------------------------------------------------------------------------------------------------------------------------------------------------|--------------------------------------------------------|------------------------------------------------------------------------------|
| sID βal              | <i>αTyr 262</i><br><i>αPro 263</i><br><i>αArg 264</i><br><i>αIle 265</i><br><i>αAsp 431</i><br><i>αGlu 434</i><br><i>αVal 435</i><br><i>βArg 400</i><br><i>βArg 401</i><br><i>βLys 402</i> | Kinesin-13<br><br>PDB ID: 5MIO, 6BBN, 6B0I             | L2 hairpin specific to the motor domain of kinesin-13 family members         |
| sID βal              | <i>αTyr 262</i><br><i>αPro 263</i><br><i>αArg 264</i><br><i>αIle 265</i><br><i>αAsp 431</i><br><i>αGlu 434</i><br><i>αVal 435</i><br><i>βArg 400</i><br><i>βArg 401</i><br><i>βLys 402</i> | Kinesin-5<br><br>PDB ID: 5MM7                          | Loop L2 of the motor domain of <i>Ustilago maydis</i> kinesin-5              |
| sID βal              | <b>αTyr 262</b><br><b>αPro 263</b><br><i>αArg 264</i><br><i>αIle 265</i><br><b>αAsp 431</b><br><b>αGlu 434</b><br><i>αVal 435</i><br><b>βArg 400</b><br><b>βArg 401</b><br><b>βLys 402</b> | Targeting protein for Xklp2 (TPX2)<br><br>PDB ID: 6BJC | N-terminal unstructured part of the ridge domain<br><br>Binds also to sID βI |

|                                                    |                                                                                                                                                                                                                                                                                                                                                                                                                                                                                                                                                  |                                                                         |                                              |
|----------------------------------------------------|--------------------------------------------------------------------------------------------------------------------------------------------------------------------------------------------------------------------------------------------------------------------------------------------------------------------------------------------------------------------------------------------------------------------------------------------------------------------------------------------------------------------------------------------------|-------------------------------------------------------------------------|----------------------------------------------|
| <p>sID <math>\beta\alpha</math></p>                | <p><math>\alpha</math>Tyr 262<br/> <math>\alpha</math>Pro 263<br/> <b><math>\alpha</math>Arg 264</b><br/> <math>\alpha</math>lle 265<br/> <b><math>\alpha</math>Asp 431</b><br/> <b><math>\alpha</math>Glu 434</b><br/> <b><math>\alpha</math>Val 435</b><br/> <b><math>\beta</math>Arg 400</b><br/> <b><math>\beta</math>Arg 401</b><br/> <b><math>\beta</math>Lys 402</b></p>                                                                                                                                                                  | <p>Tau<br/> PDB ID: 6CVN, 6CVJ</p>                                      | <p>R1 and R2 repeats</p>                     |
| <p>sID <math>\beta\alpha^{\alpha}</math></p>       | <p><math>\alpha</math>Tyr 262<br/> <math>\alpha</math>Pro 263<br/> <math>\alpha</math>Arg 264<br/> <math>\alpha</math>lle 265<br/> <math>\alpha</math>Asp 431<br/> <math>\alpha</math>Glu 434<br/> <math>\alpha</math>Val 435</p>                                                                                                                                                                                                                                                                                                                | <p>iE5 alphaRep<br/> PDB ID: 6GWC</p>                                   | <p>Helix 2 of the N-cap</p>                  |
| <p>sID <math>\beta\alpha^{III^{\alpha}}</math></p> | <p><math>\alpha</math>Leu 248<br/> <math>\alpha</math>Val 250<br/> <math>\alpha</math>Asn 258<br/> <math>\alpha</math>Pro 325<br/> <math>\alpha</math>Val 328<br/> <math>\alpha</math>Asn 329<br/> <math>\alpha</math>lle 332<br/> <math>\alpha</math>Pro 348<br/> <math>\alpha</math>Gly 350<br/> <math>\alpha</math>Phe 351<br/> <math>\alpha</math>Lys 352<br/> <math>\alpha</math>Val 353<br/> <math>\alpha</math>Gly 354<br/> <math>\alpha</math>lle 355</p>                                                                                | <p>Stathmin like domain of RB3<br/> PDB ID: 1FFX, 6GVM</p>              | <p>N-terminal <math>\beta</math>-hairpin</p> |
| <p>sID <math>\beta\alpha^{III^{\beta}}</math></p>  | <p><math>\beta</math>Pro 173<br/> <math>\beta</math>Ser 174<br/> <math>\beta</math>Pro 175<br/> <math>\beta</math>Lys 176<br/> <math>\beta</math>Val 177<br/> <math>\beta</math>Ser 178<br/> <math>\beta</math>Asp 179<br/> <math>\beta</math>Thr 180<br/> <math>\beta</math>Val 181<br/> <math>\beta</math>Glu 183<br/> <math>\beta</math>Pro 184<br/> <math>\beta</math>Tyr 210<br/> <math>\beta</math>Thr 221<br/> <math>\beta</math>Pro 222<br/> <math>\beta</math>Thr 223<br/> <math>\beta</math>Tyr 224<br/> <math>\beta</math>Leu 227</p> | <p>Designed Ankyrin Repeat Protein (DARPin)<br/> PDB ID: 4DRX, 5EYP</p> | <p>Repeat 4</p>                              |

|  |                 |  |  |
|--|-----------------|--|--|
|  | <i>βGln 394</i> |  |  |
|--|-----------------|--|--|

### α-Tubulin

| siD/pID <sup>1</sup> | ResID <sup>2</sup>                                                                                                                                                                                                                                                                                                                     | Protein <sup>3</sup>                              | Structural element involved <sup>4</sup>                   |
|----------------------|----------------------------------------------------------------------------------------------------------------------------------------------------------------------------------------------------------------------------------------------------------------------------------------------------------------------------------------|---------------------------------------------------|------------------------------------------------------------|
| pID αI<br>(αI)       | αPhe 141<br>αTyr 172<br>αMet 203<br>αVal 204<br>αAsp 205<br><i>αGlu 207</i><br>αPhe 267<br>αPro 268<br>αLeu 269<br>αAla 270<br>αVal 303<br><i>αLys 304</i><br>αCys 305<br><i>αAsp 306</i><br>αPro 307<br><i>αHis 309</i><br>αAla 383<br>αIle 384<br><i>αGlu 386</i><br>αAla 387<br>αTrp 388<br><i>αArg 390</i><br>αLeu 391<br>αLys 394 | Tubulin Tyrosine Ligase (TTL)<br><br>PDB ID: 4IHJ | Loops β3-β4 and α9-β13                                     |
| pID αV               | αPro 274<br>αIle 276<br>αLys 280<br><i>αAla 281</i><br><i>αTyr 282</i><br>αHis 283<br>αGlu 284<br><i>αGln 285</i><br>αLeu 286<br>αAla 369<br><i>αLys 370</i><br><i>αVal 371</i><br><i>αGln 372</i><br><i>αArg 373</i>                                                                                                                  | Stu2p/Alp14p<br><br>PDB ID: 6MZG                  | Helix HRA4 of the tumor overexpressed gene 1 (TOG1) domain |
| pID αVI              | αAsn 258<br>αPro 261                                                                                                                                                                                                                                                                                                                   | Stathmin like domain of RB3                       | N-terminal β-hairpin                                       |

|                  |                                                                                                                                                                                                                                                                                                                                                                                |                                    |                 |
|------------------|--------------------------------------------------------------------------------------------------------------------------------------------------------------------------------------------------------------------------------------------------------------------------------------------------------------------------------------------------------------------------------|------------------------------------|-----------------|
|                  | $\alpha$ Met 313<br>$\alpha$ Ala 314<br>$\alpha$ Cys 315<br>$\alpha$ Phe 343<br><i><math>\alpha</math>Cys 347</i><br><i><math>\alpha</math>Pro 348</i><br><i><math>\alpha</math>Gly 350</i><br><i><math>\alpha</math>Phe 351</i><br><i><math>\alpha</math>Lys 352</i>                                                                                                          | PDB ID: 1FFX, 6GVM                 |                 |
| pID $\alpha$ VII | $\alpha$ Ser 54<br><i><math>\alpha</math>Glu 55</i><br><i><math>\alpha</math>Thr 56</i><br><i><math>\alpha</math>Val 62</i><br>$\alpha$ Pro 63<br>$\alpha$ Arg 64<br><i><math>\alpha</math>His 88</i><br><i><math>\alpha</math>Glu 90</i><br>$\alpha$ Gln 91<br>$\alpha$ Arg 121<br><i><math>\alpha</math>Lys 124</i><br>$\alpha$ Leu 125<br><i><math>\alpha</math>Gln 128</i> | iiiA5 alphaRep<br><br>PDB ID: 6GX7 | Helices 2 and 4 |

<sup>1</sup>Pocket and site identifiers. Fragment sites that are located at the  $\beta$ Tub1- $\alpha$ Tub2 inter-dimer interface in the T<sub>2</sub>R-TTL complex and thus represent composite sites are considered separately as half sites; they are indicated with “ $\alpha$ ” and “ $\beta$ ” superscripts to denote whether they belong to  $\alpha$ - or  $\beta$ -tubulin, respectively.

<sup>2</sup>Tubulin residues that are involved in pocket or site formation (taken from Table S1 and Table S3). Residues that are shared between a pocket or a site and the tubulin-binding region of a protein partner (maximal distance of 4 Å) are shown in italic for unassembled “curved” tubulin and in bold for assembled “straight” tubulin.

<sup>3</sup>Protein partners that target a pocket or a site. The Protein Data Bank IDs of the structures that were used for the analysis are indicated. For some proteins, the composite fragment sites located at the  $\beta$ Tub1- $\alpha$ Tub2 inter-dimer interface were split and considered separately as sub  $\beta$ -tubulin and sub  $\alpha$ -tubulin sites (indicated with superscripts).

<sup>4</sup>Structural elements of the protein partner that is involved in the interaction with a pocket or a site.

Figure S1

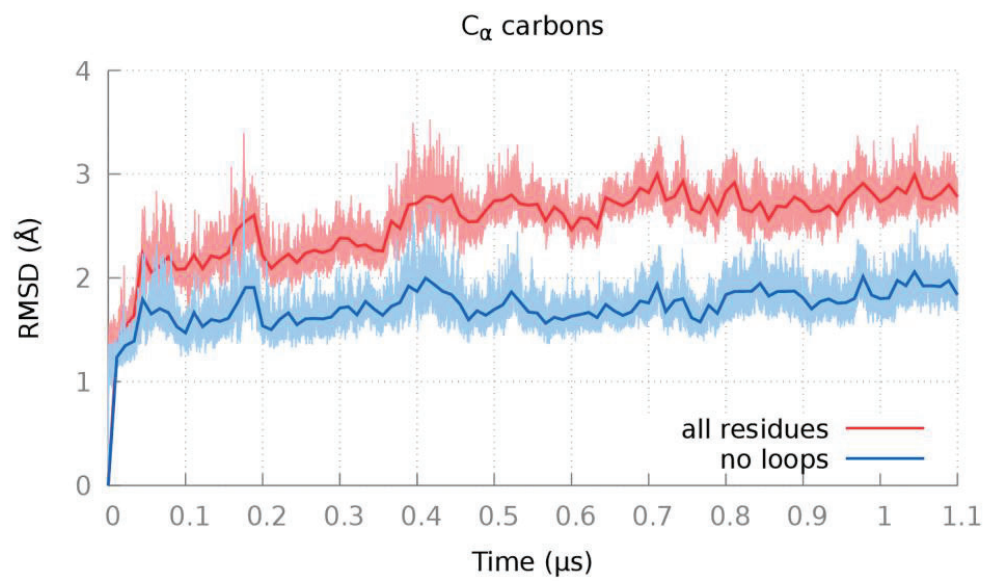



Figure S2

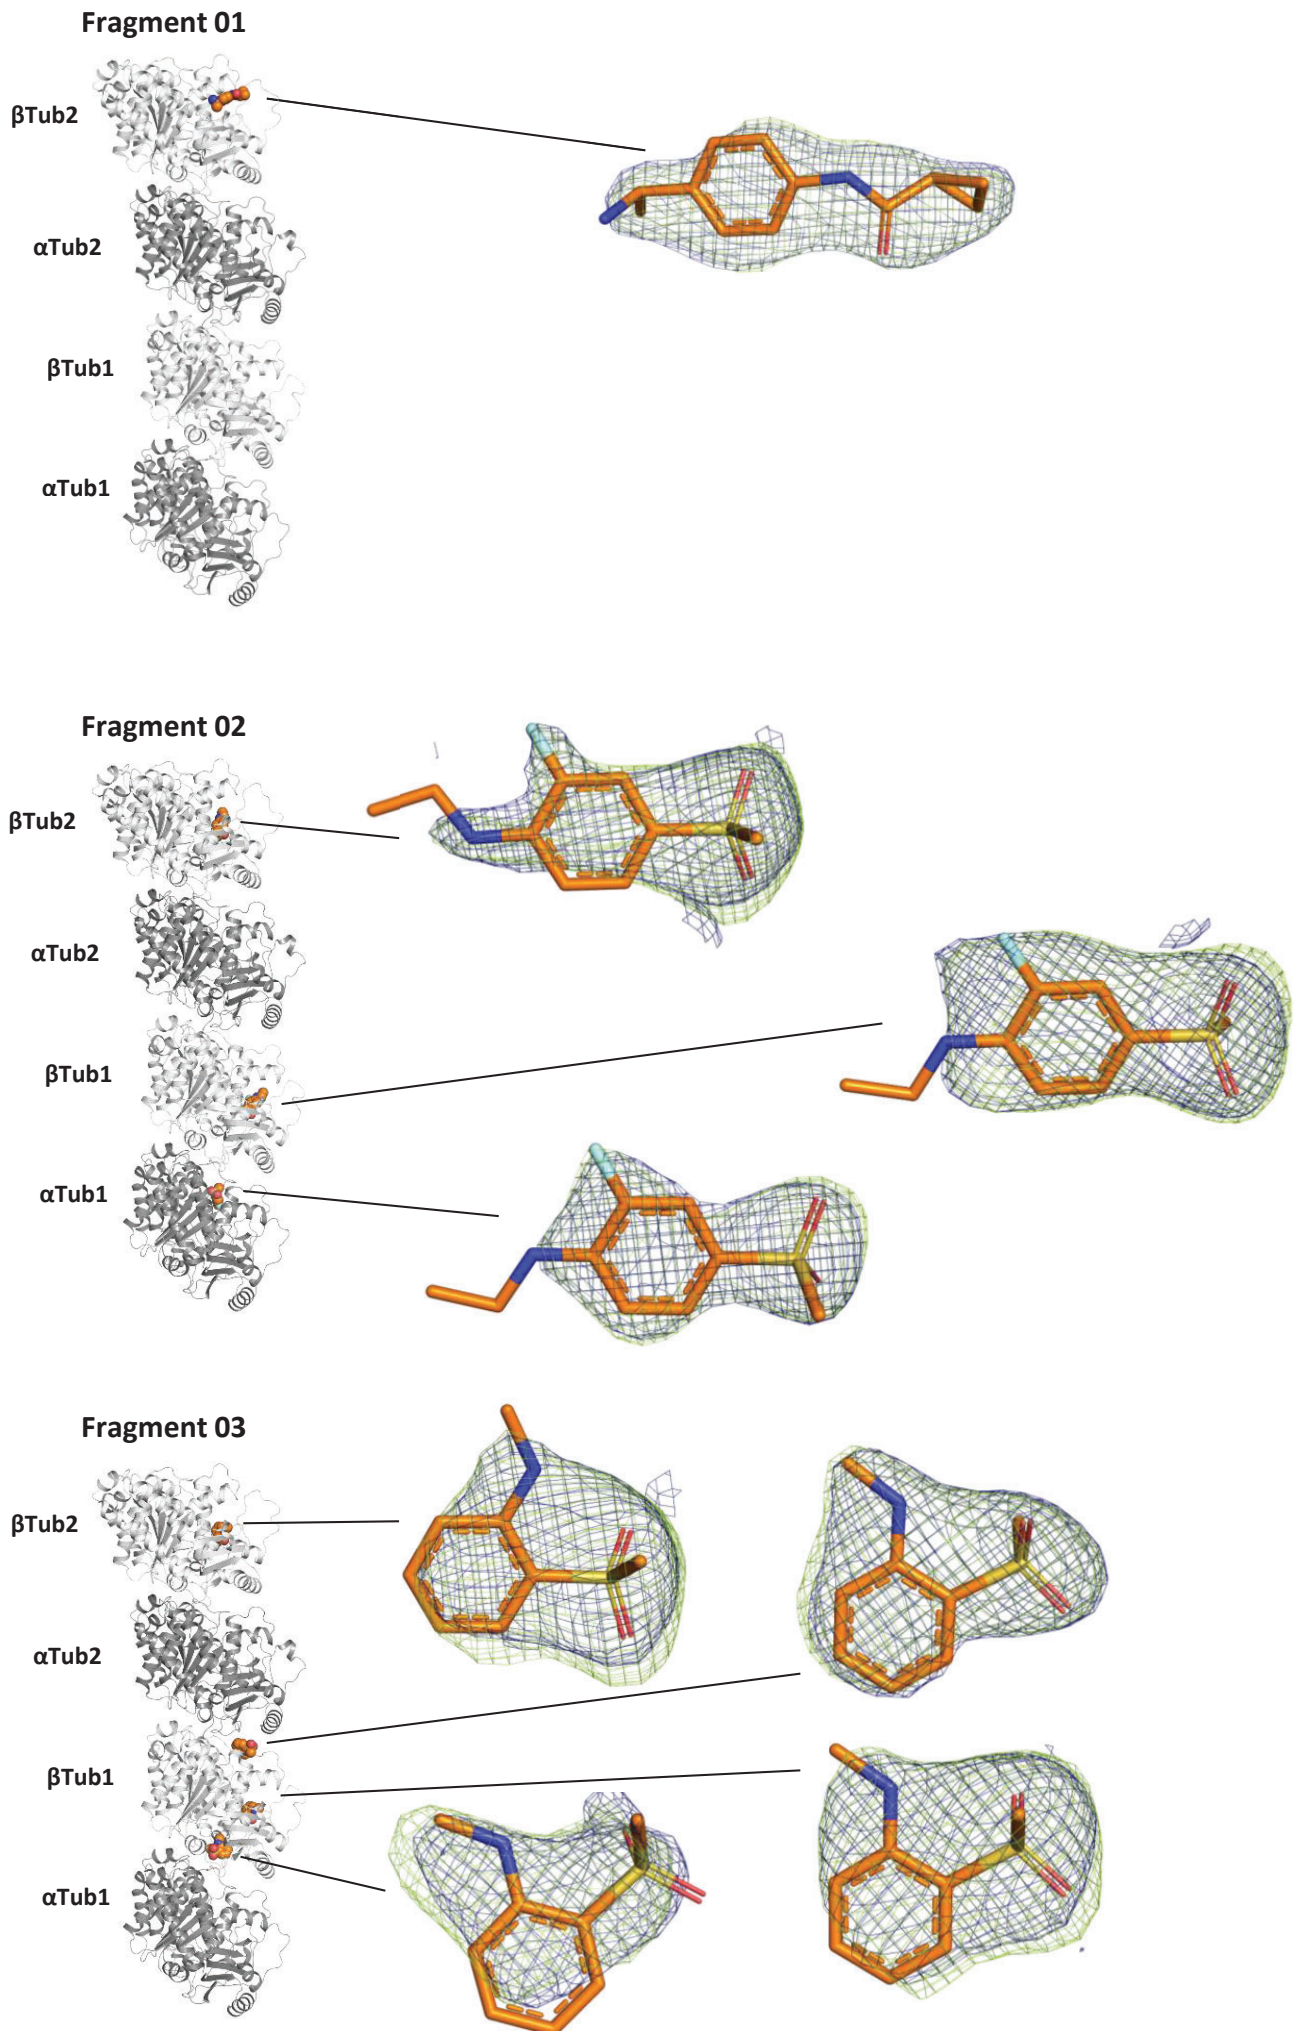

Figure S2 (continued)

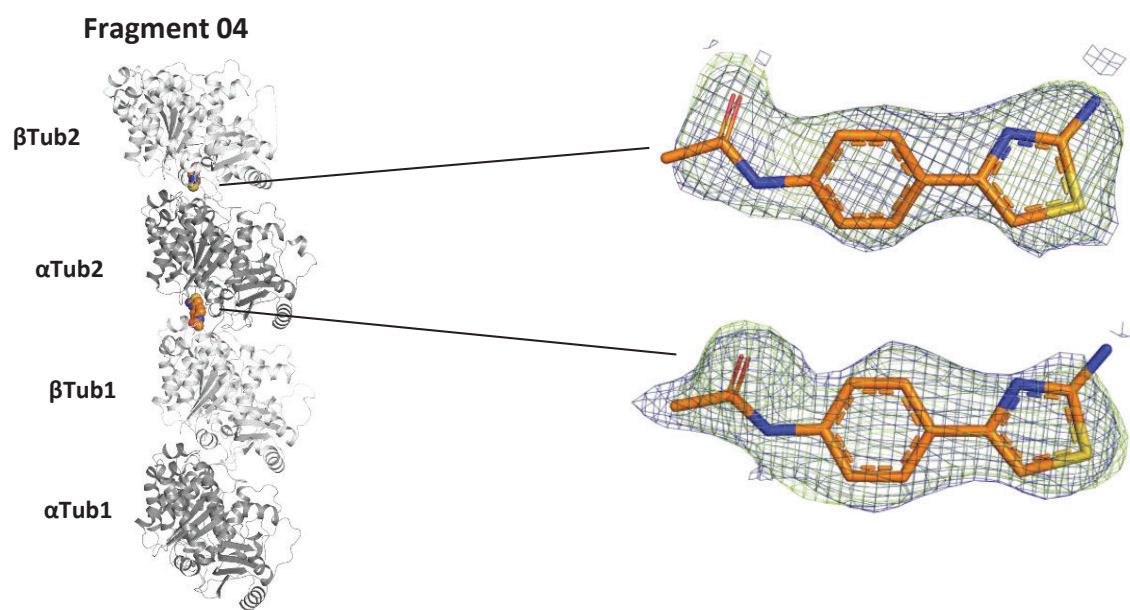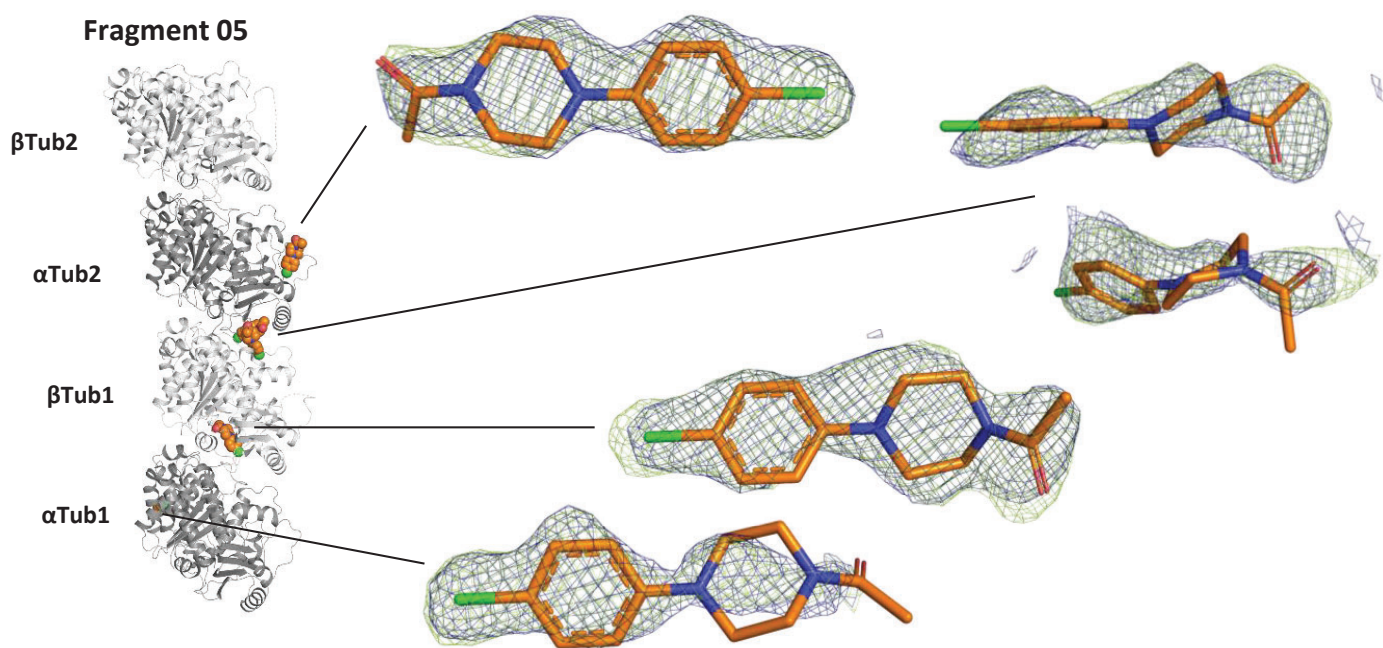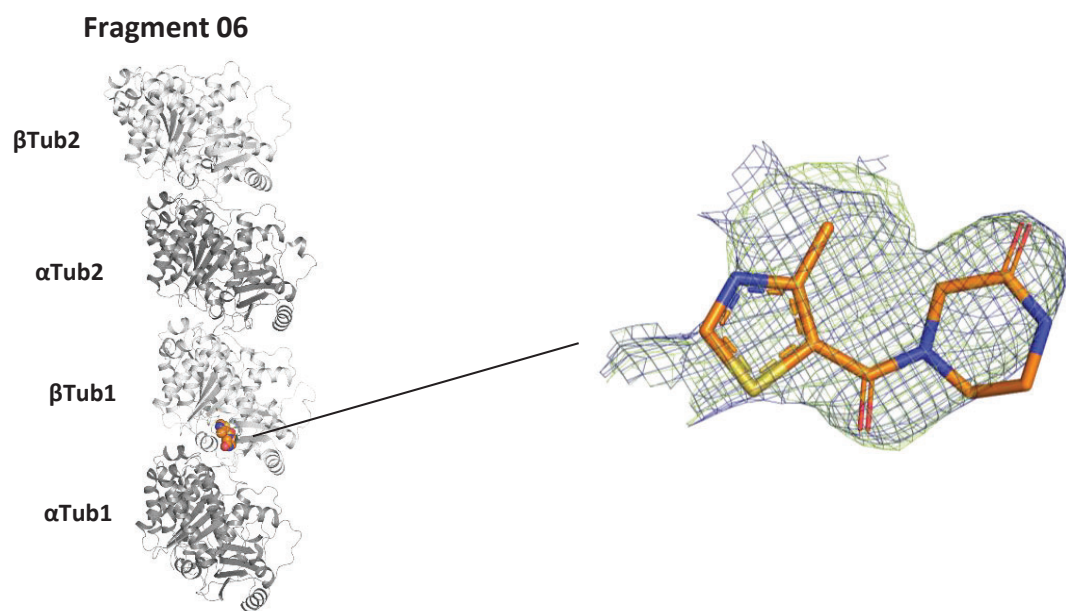

Figure S2 (continued)

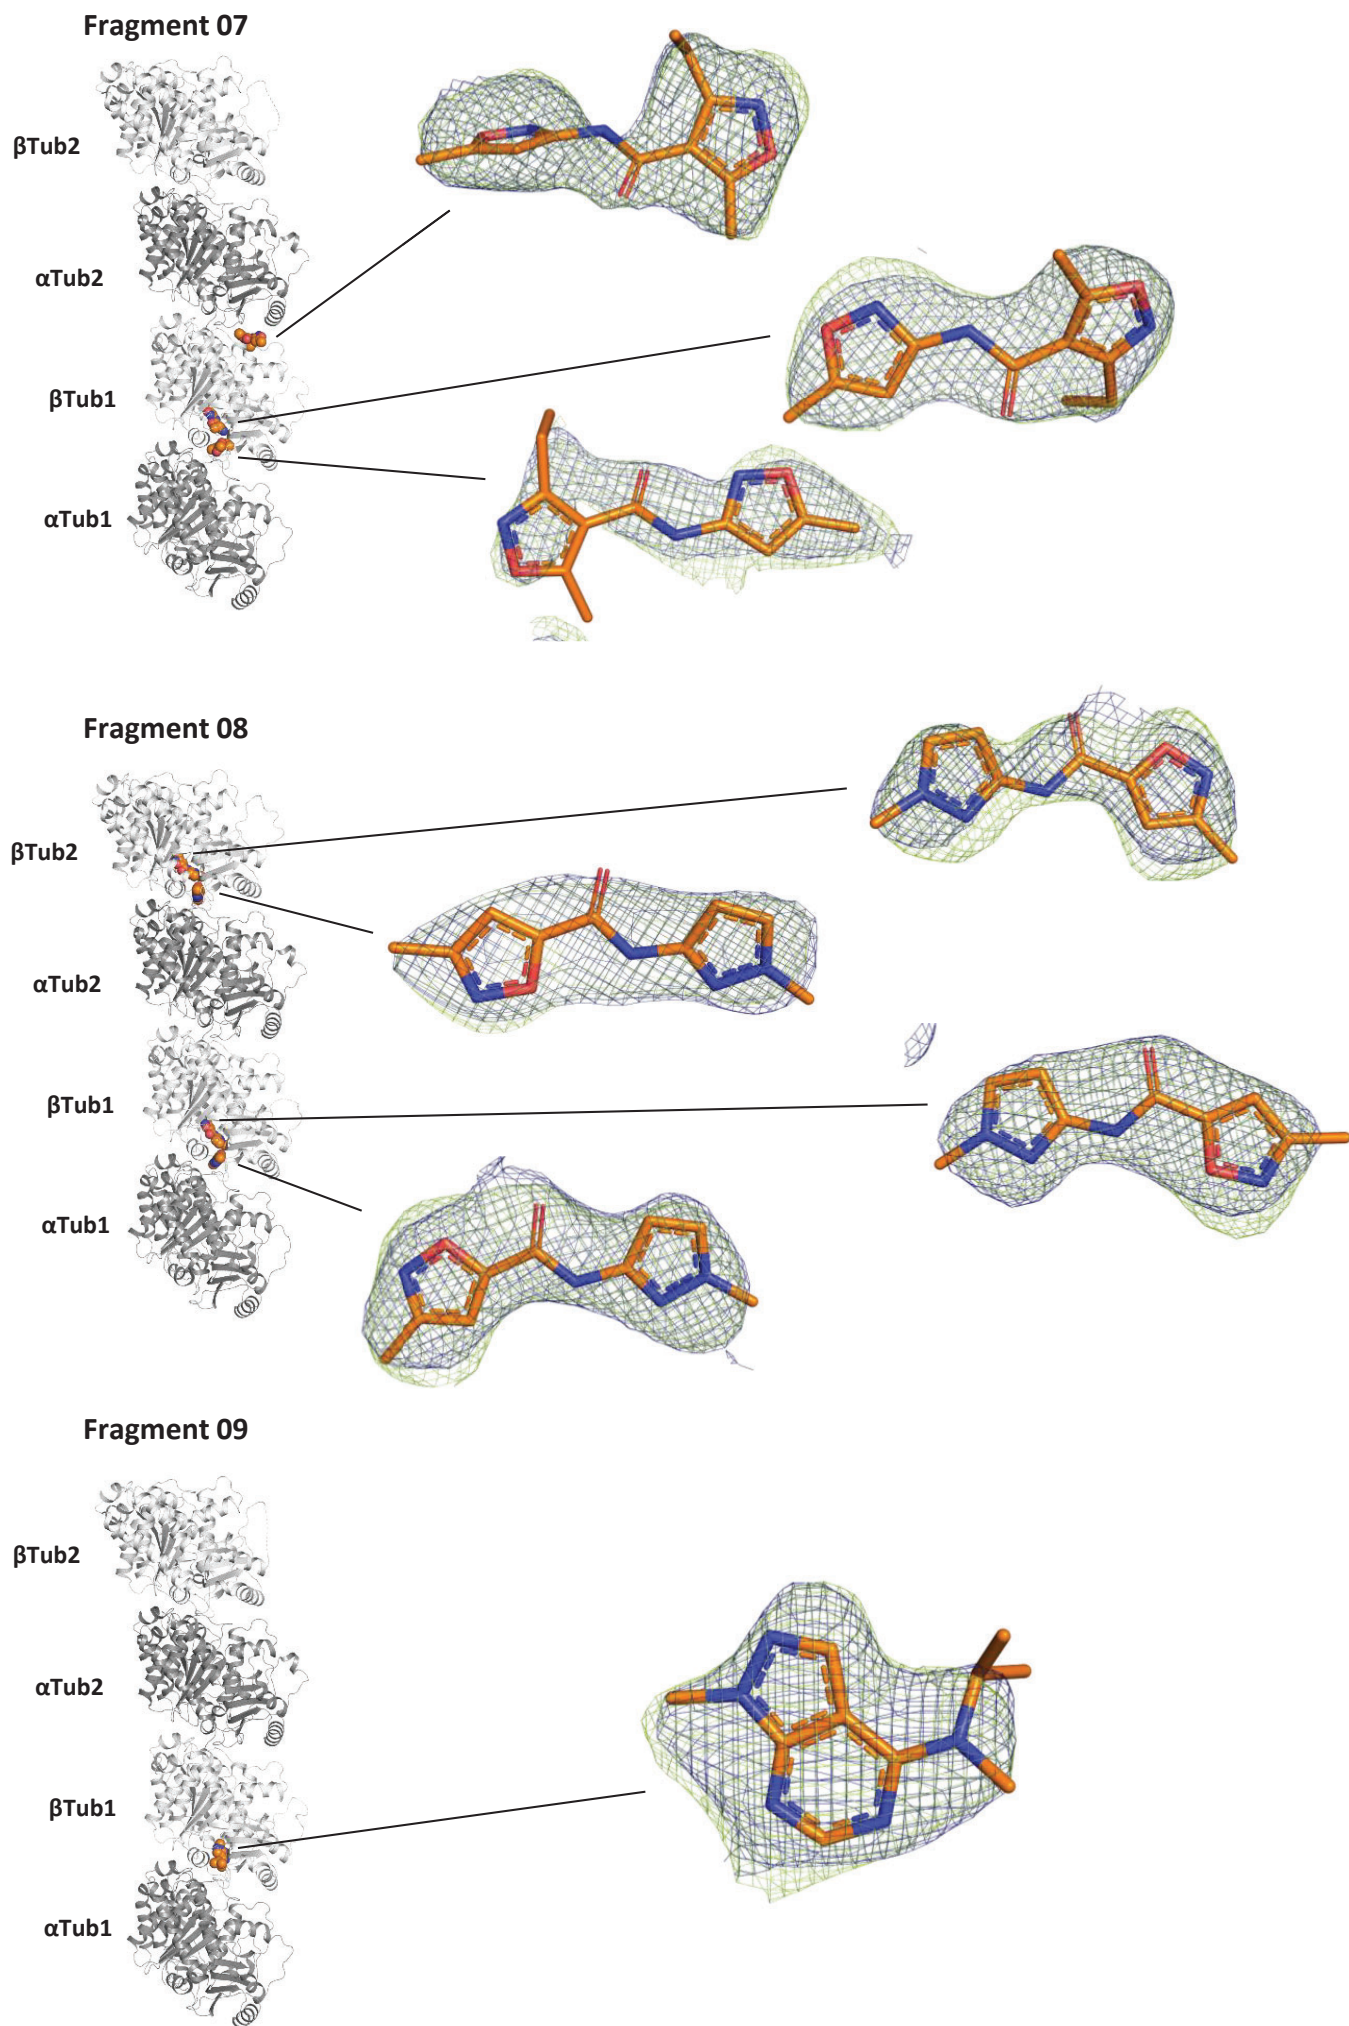

Figure S2 (continued)

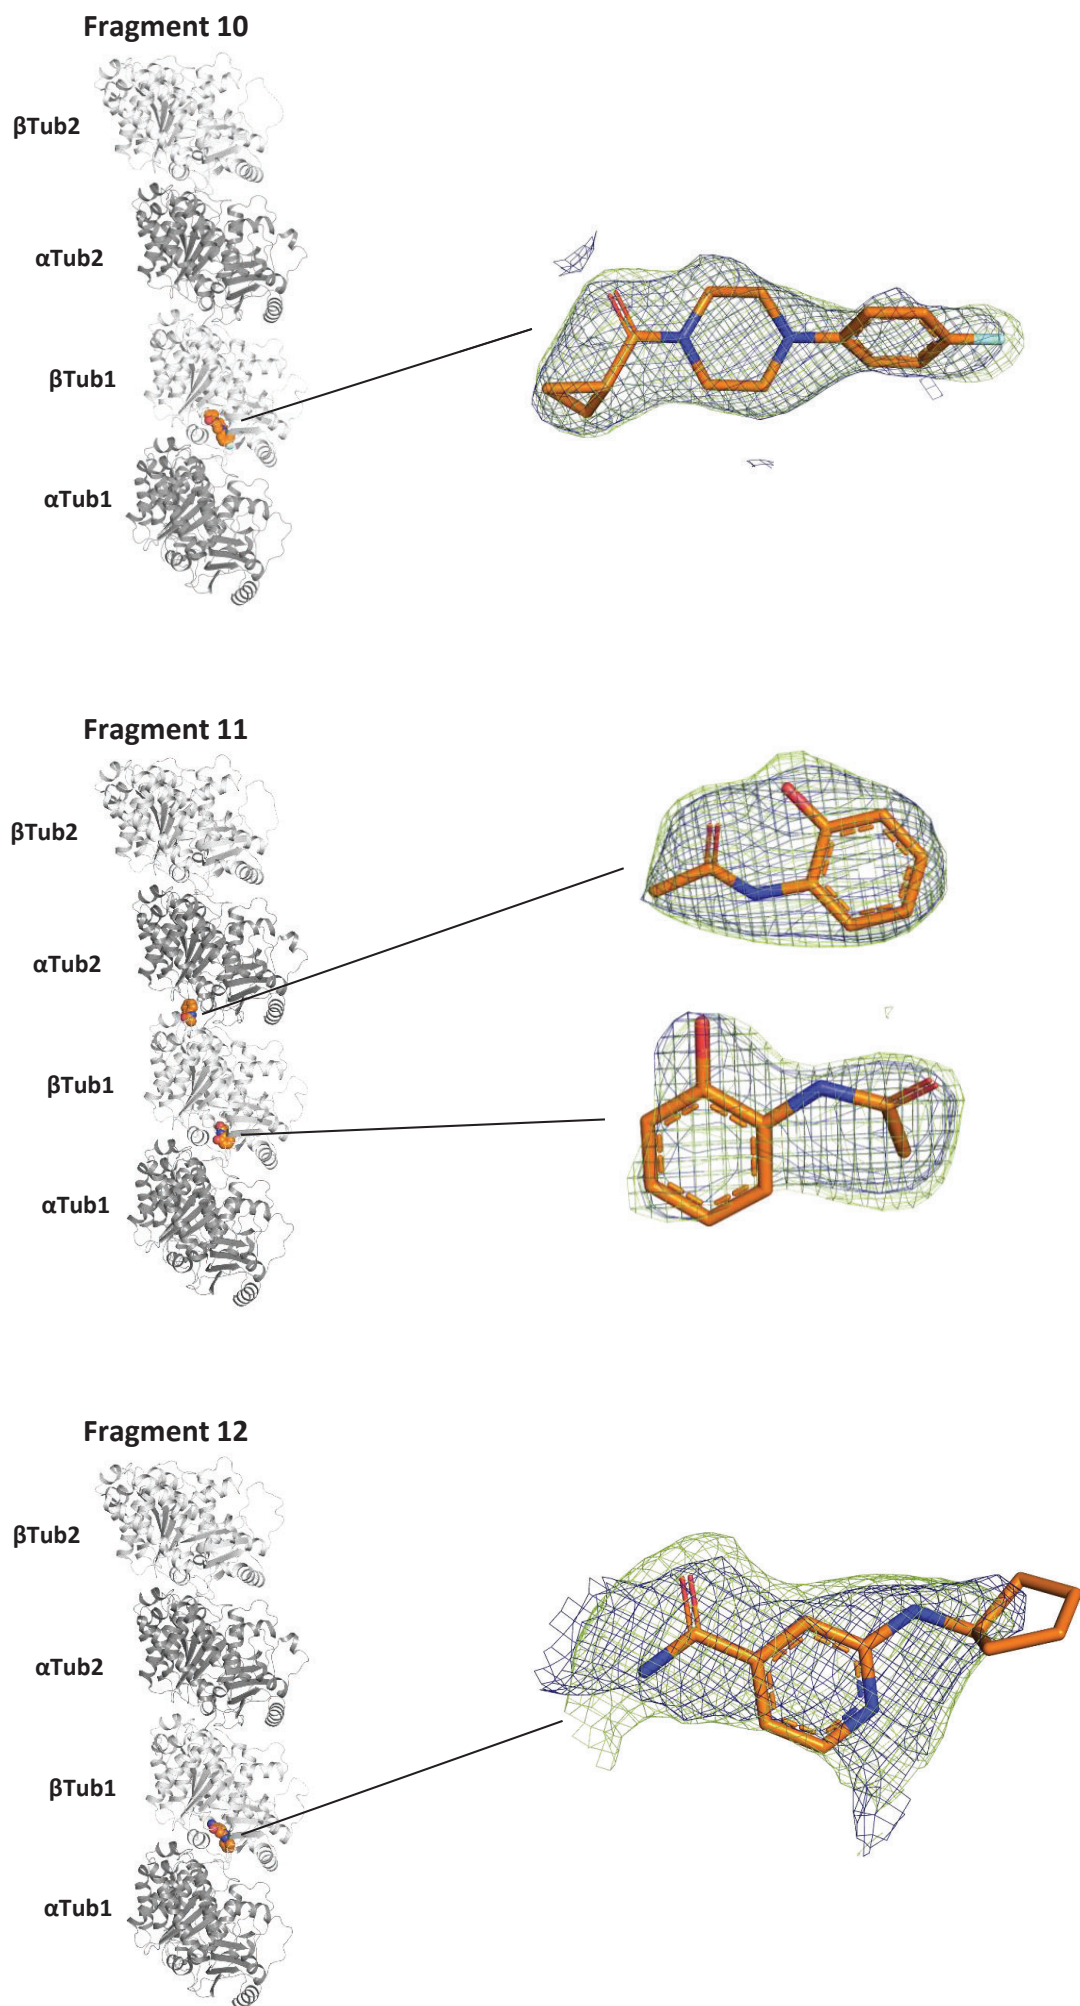

Figure S2 (continued)

Fragment 13

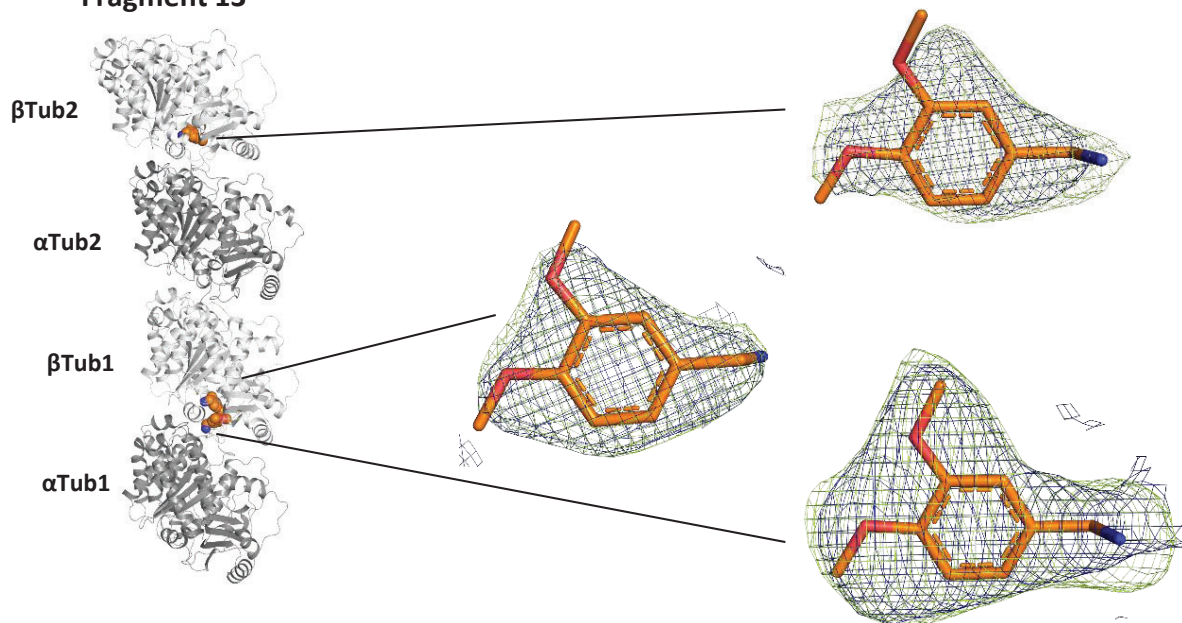

Fragment 14

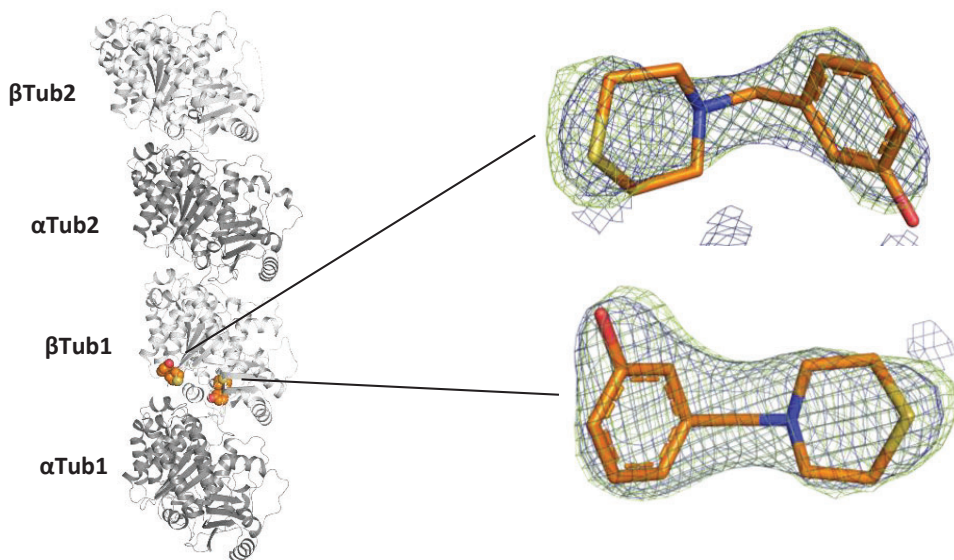

Fragment 15

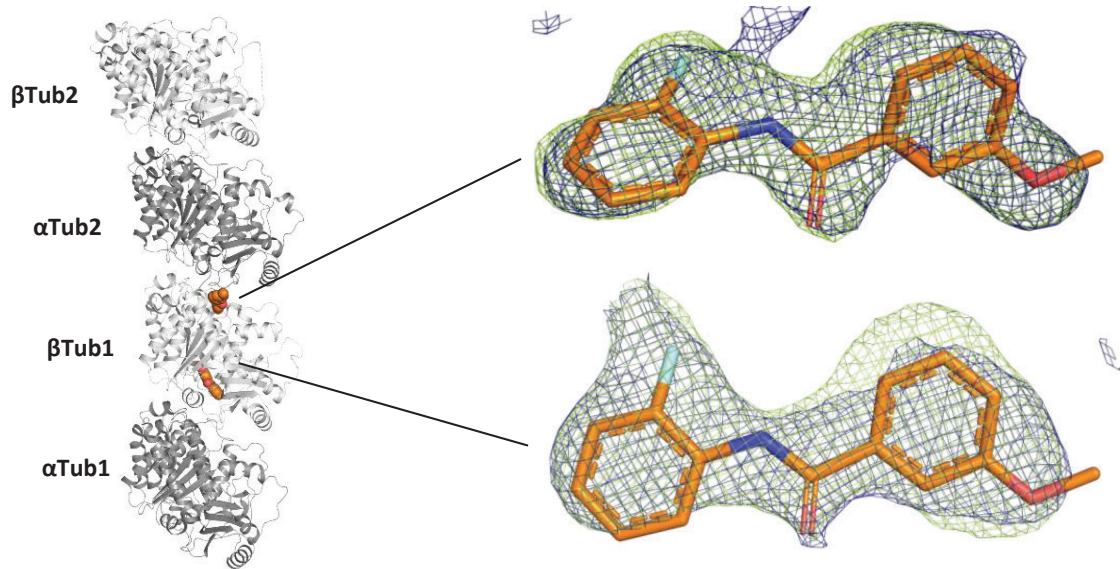

Figure S2 (continued)

Fragment 16

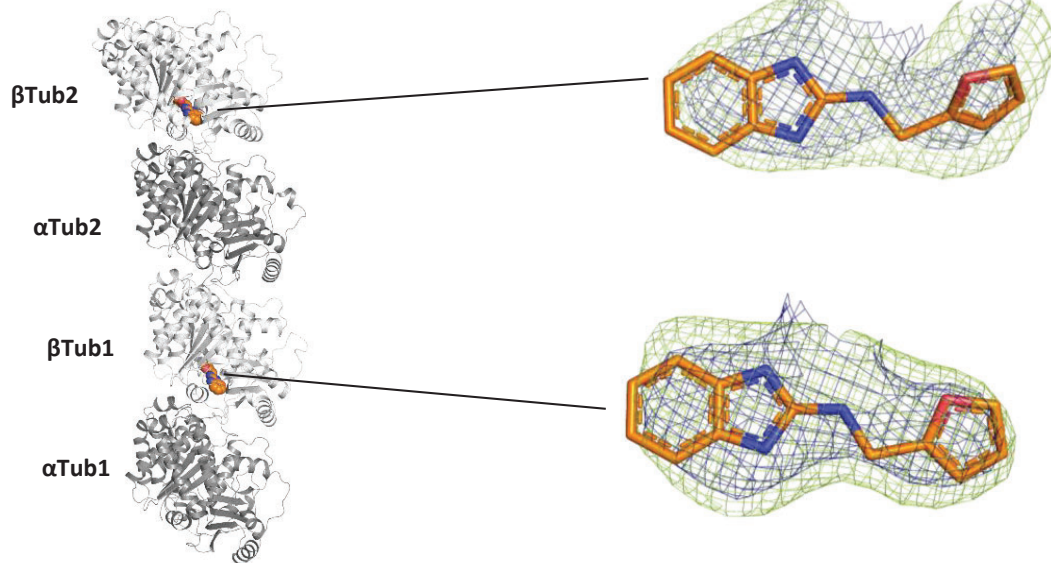

Fragment 17

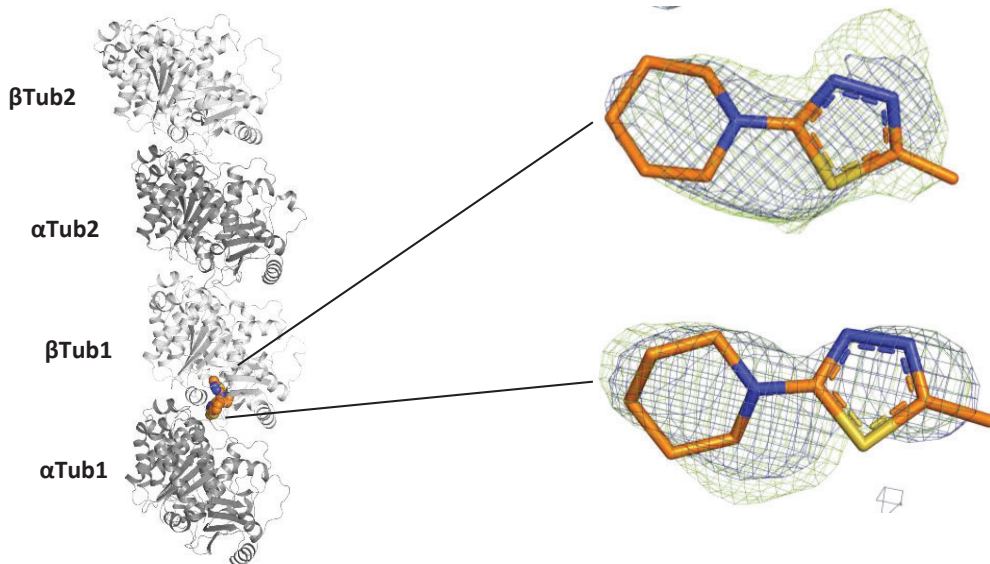

Fragment 18

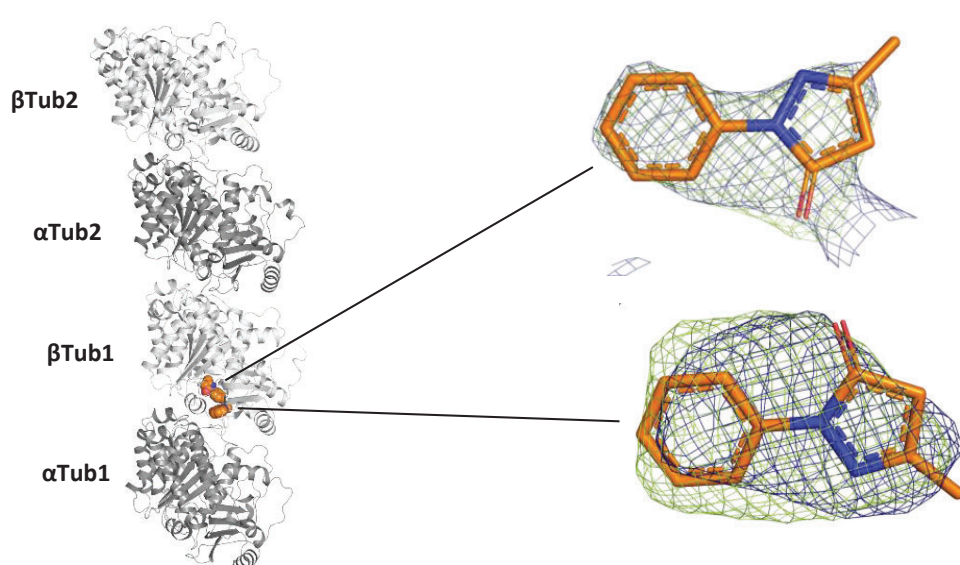

Figure S2 (continued)

Fragment 19

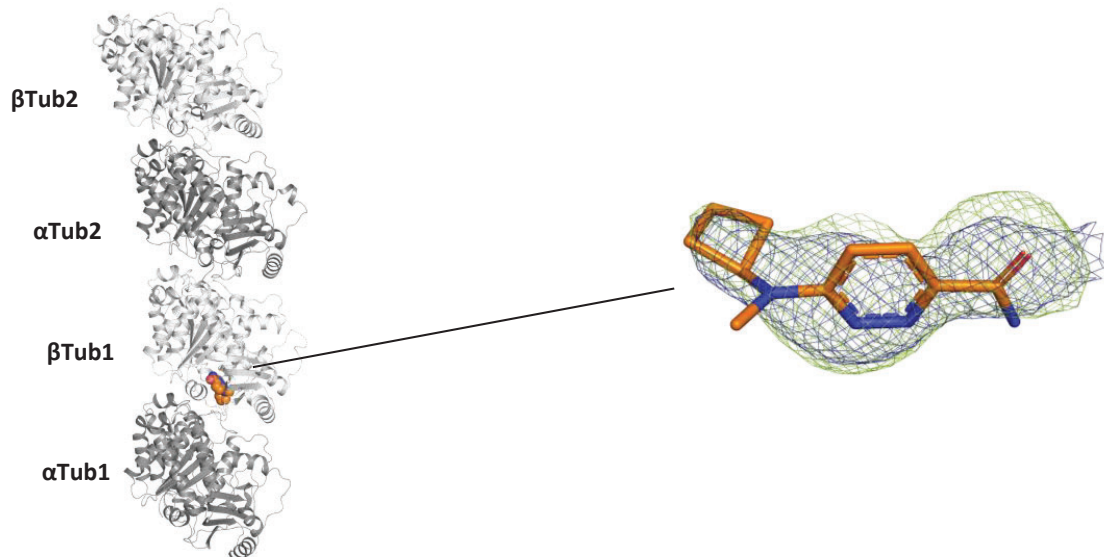

Fragment 20

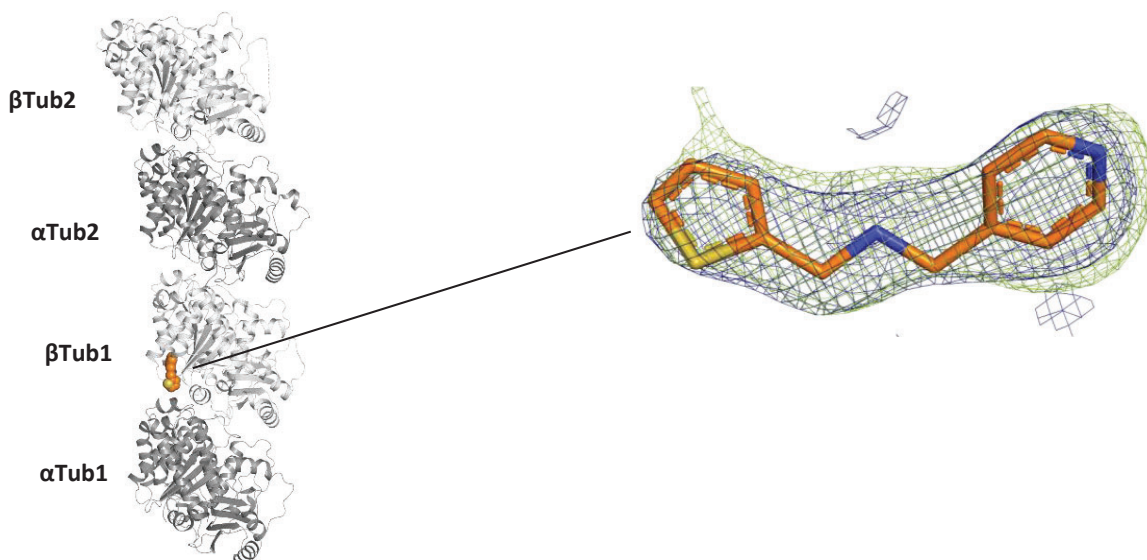

Fragment 21

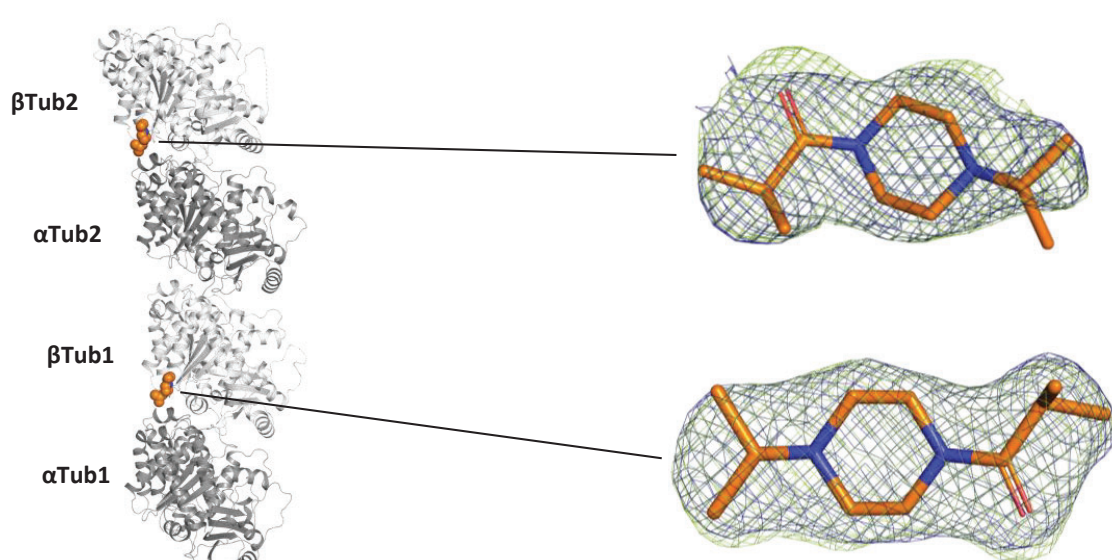

Figure S2 (continued)

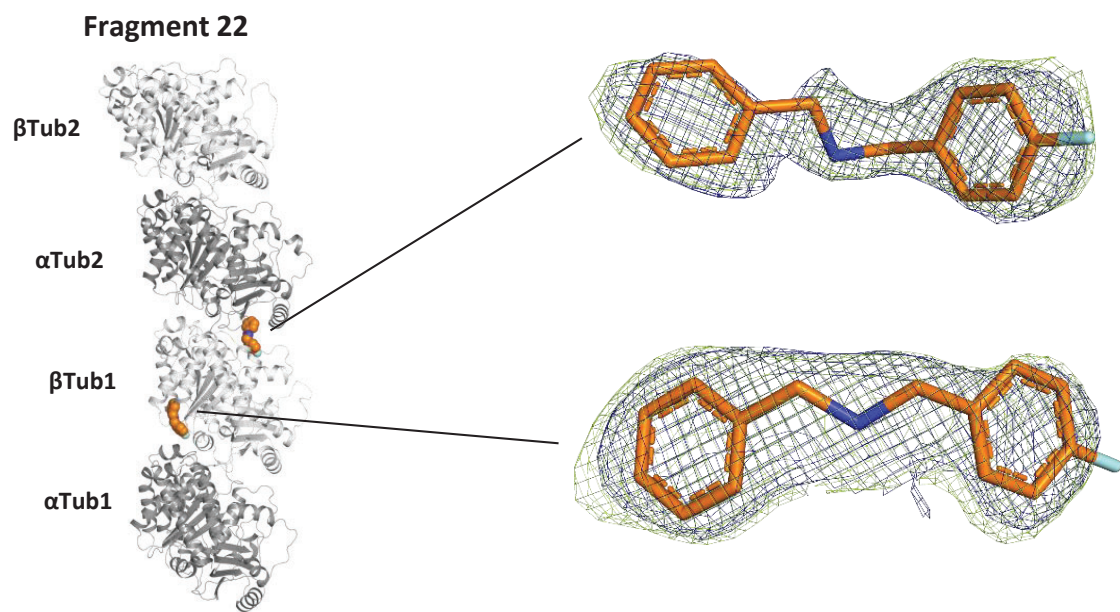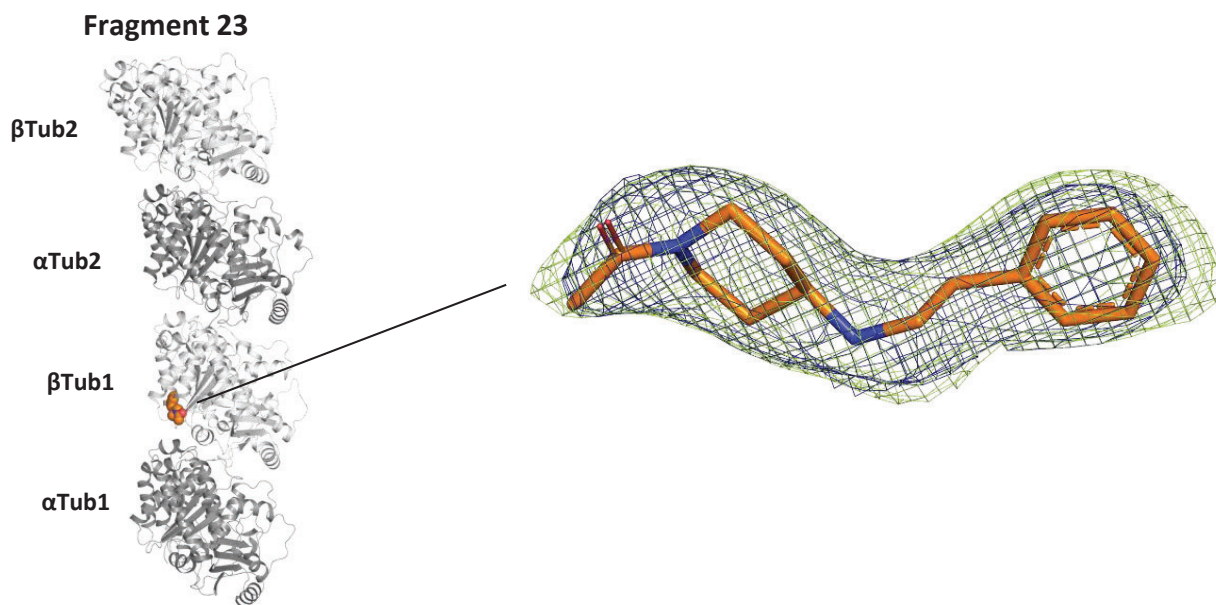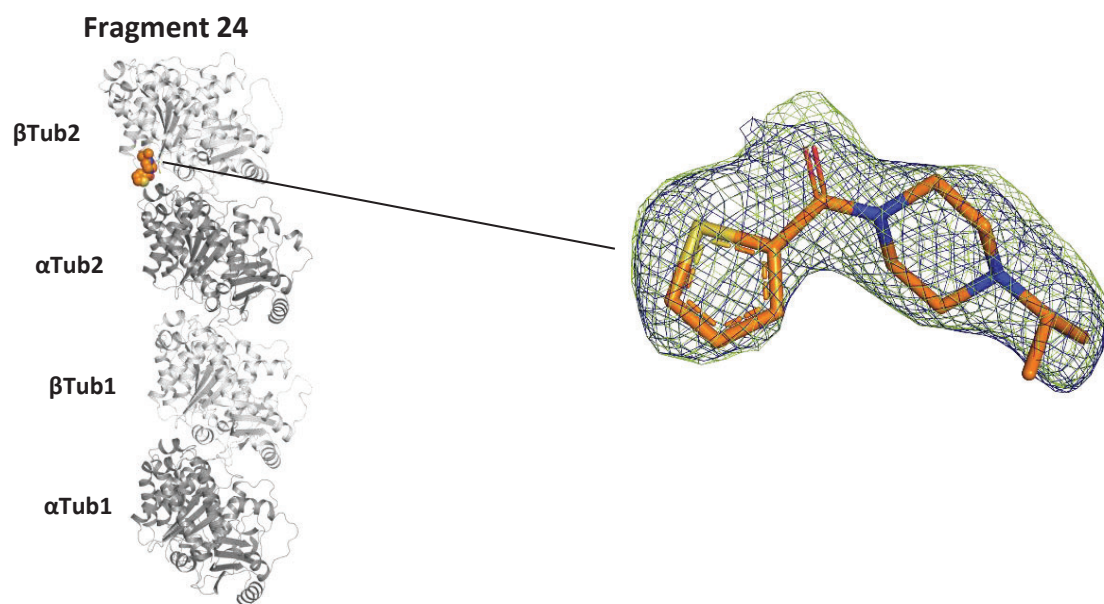



Figure S2 (continued)

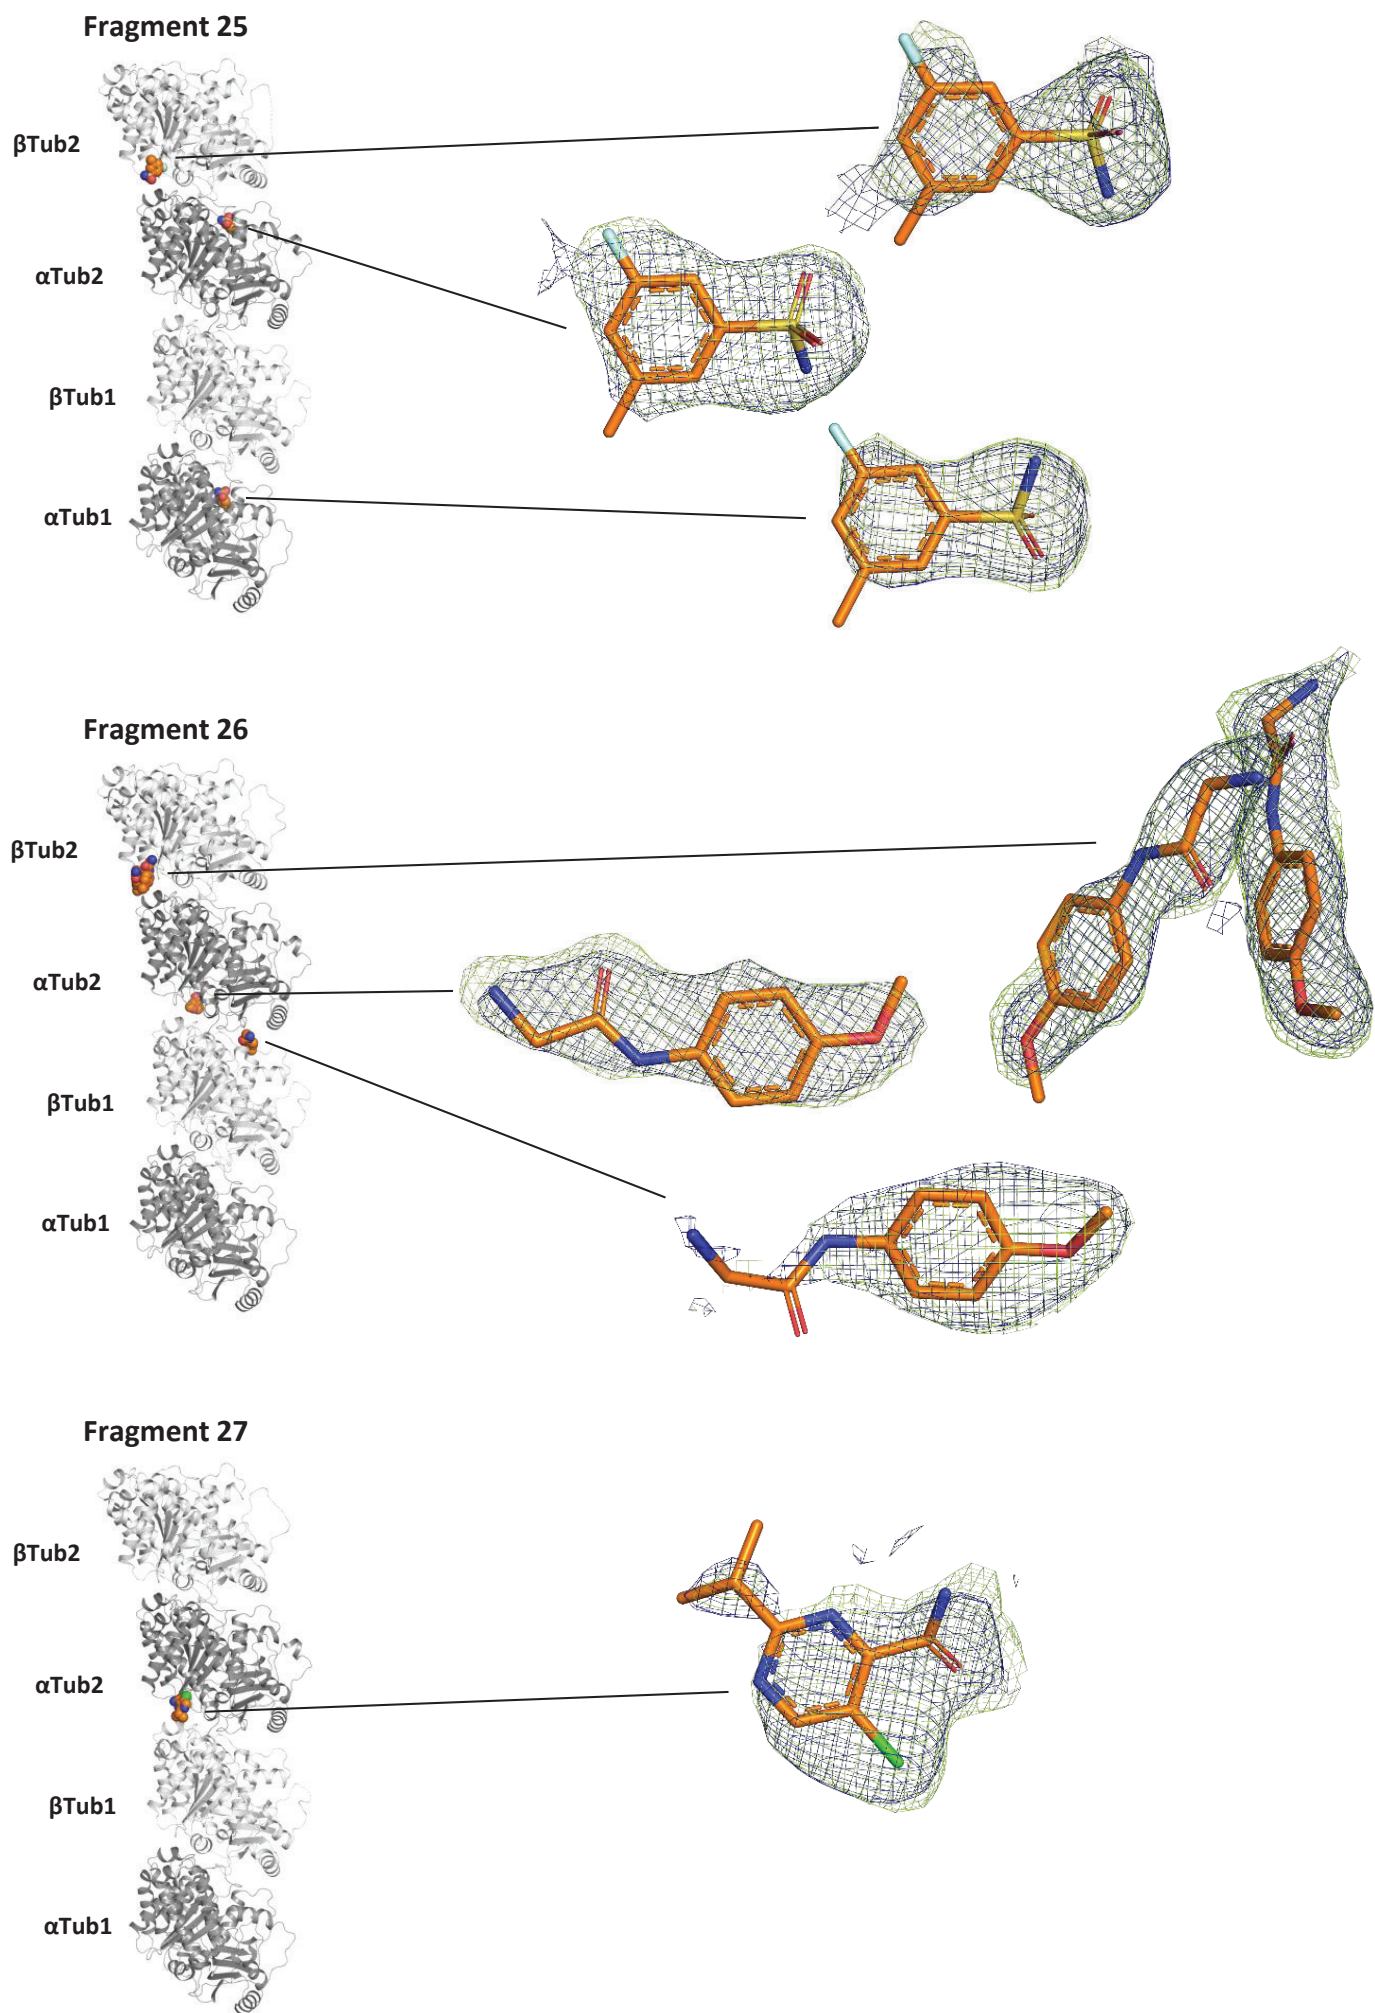

Figure S2 (continued)

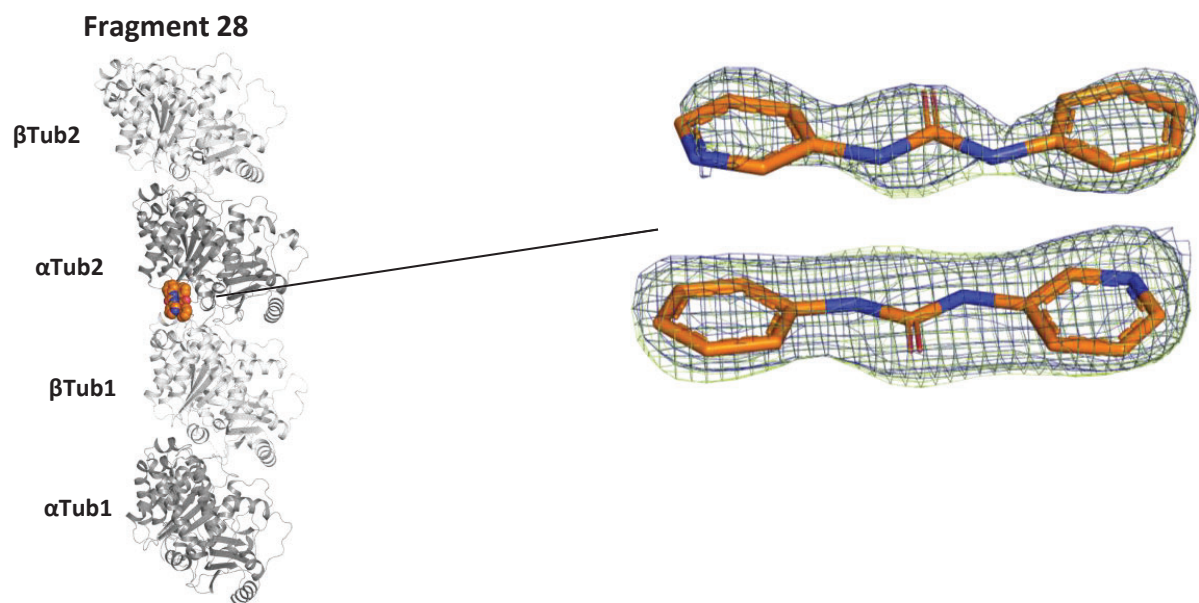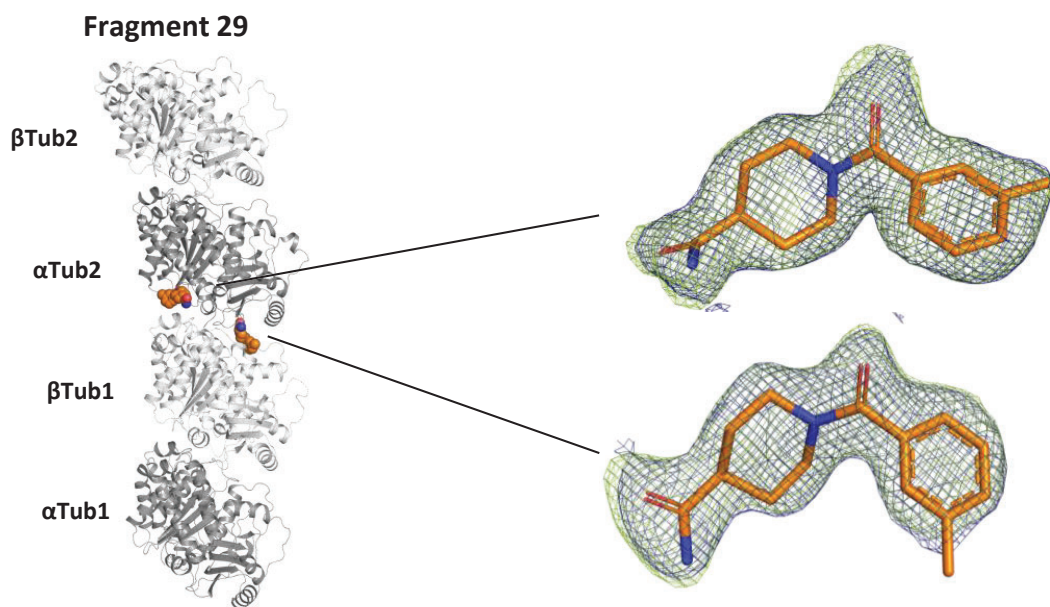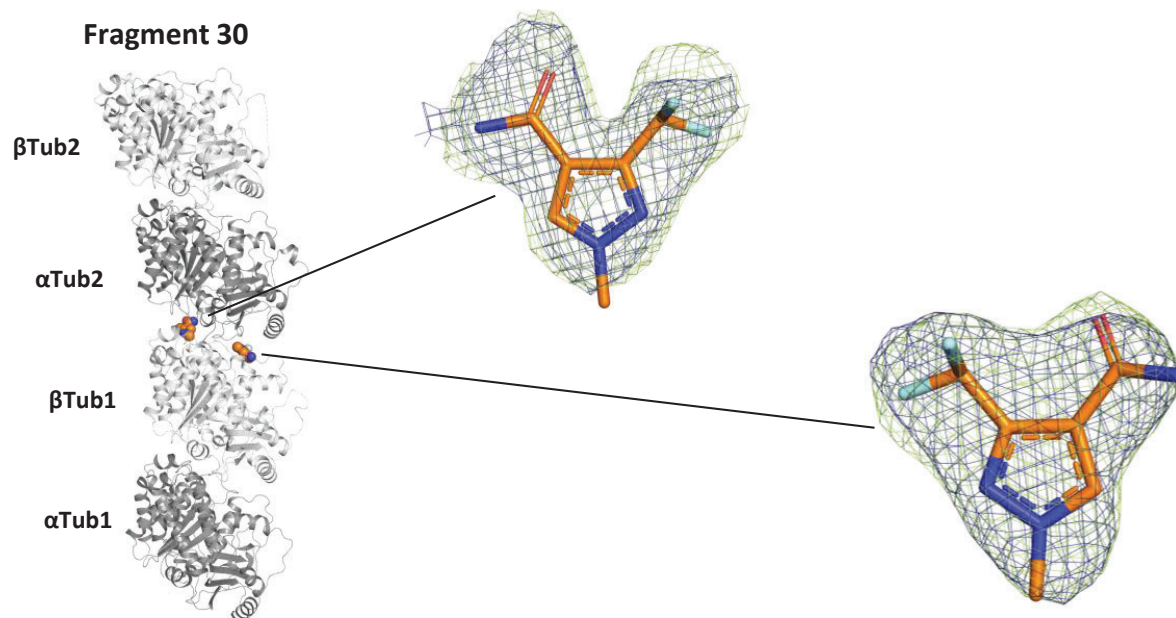

Figure S2 (continued)

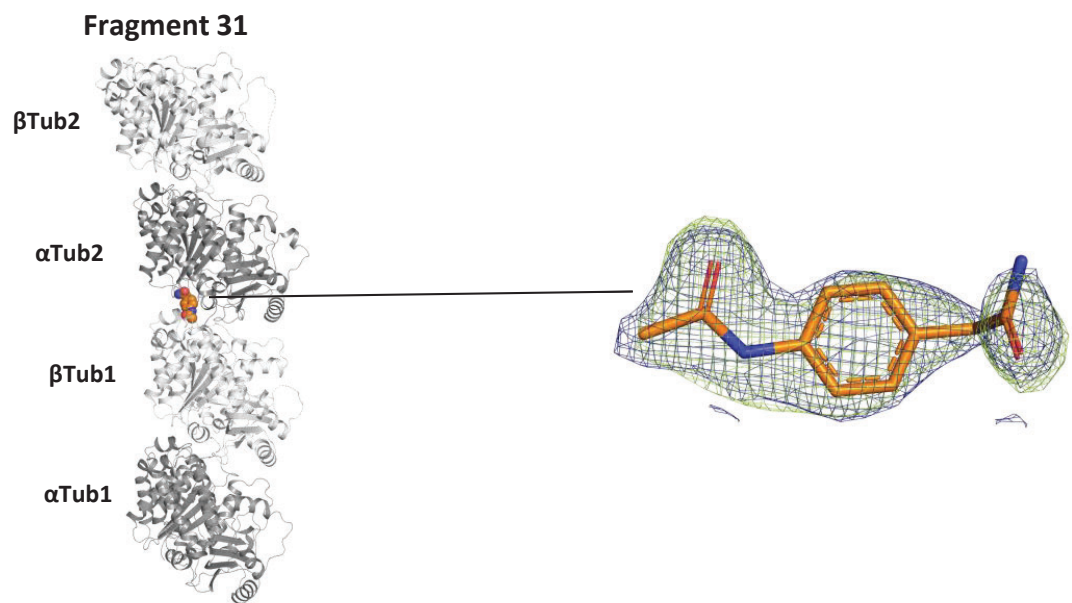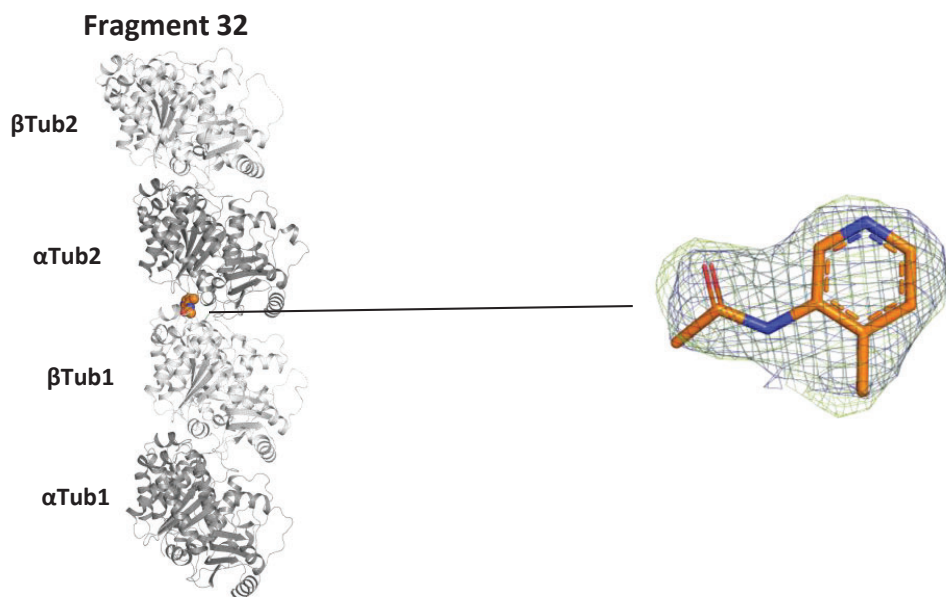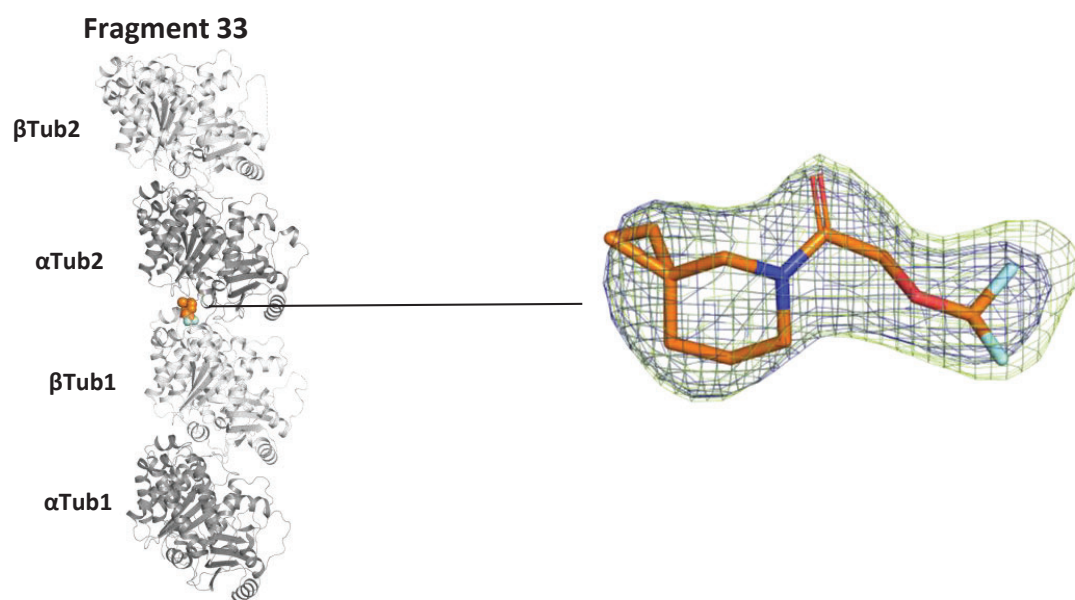

Figure S2 (continued)

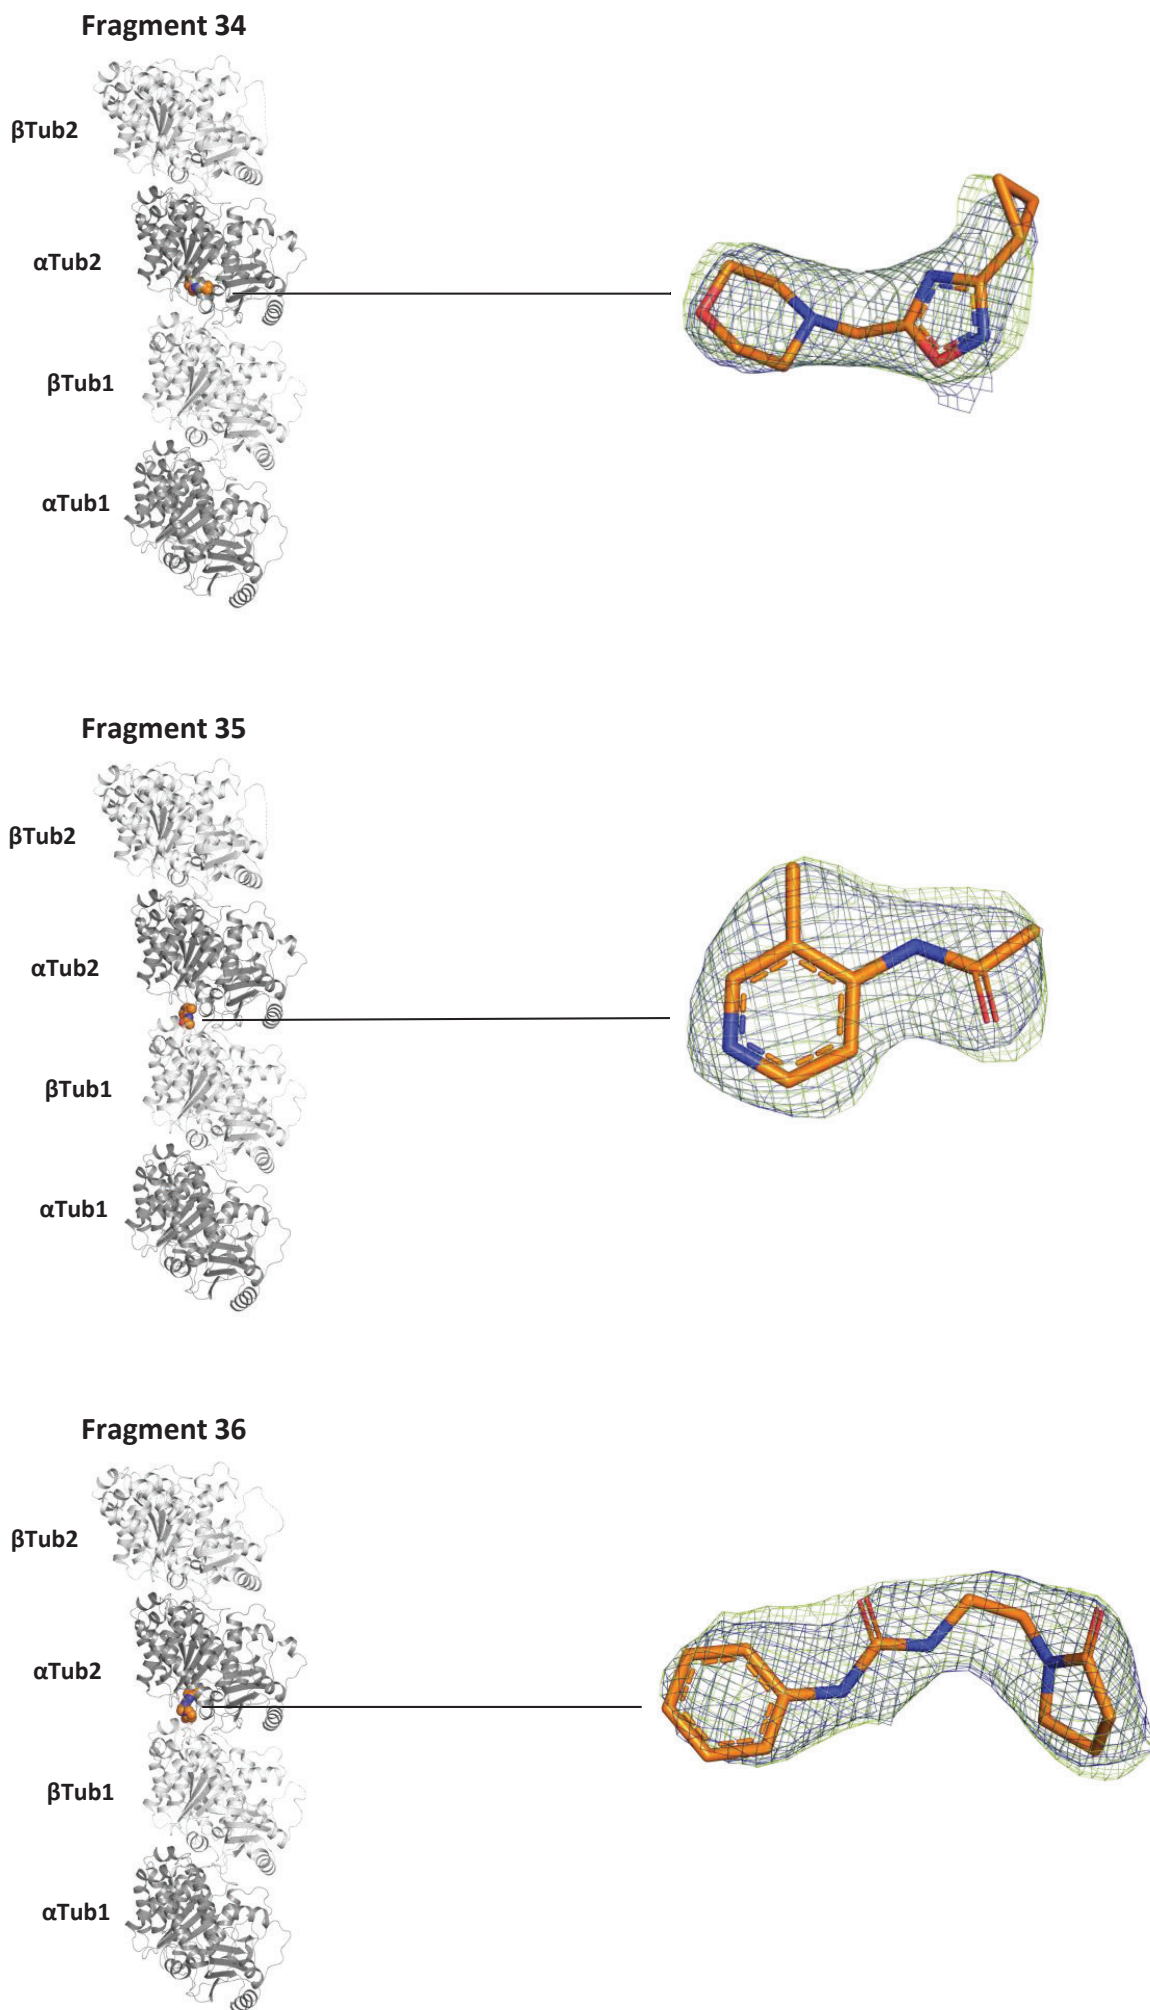

Figure S2 (continued)

Fragment 37

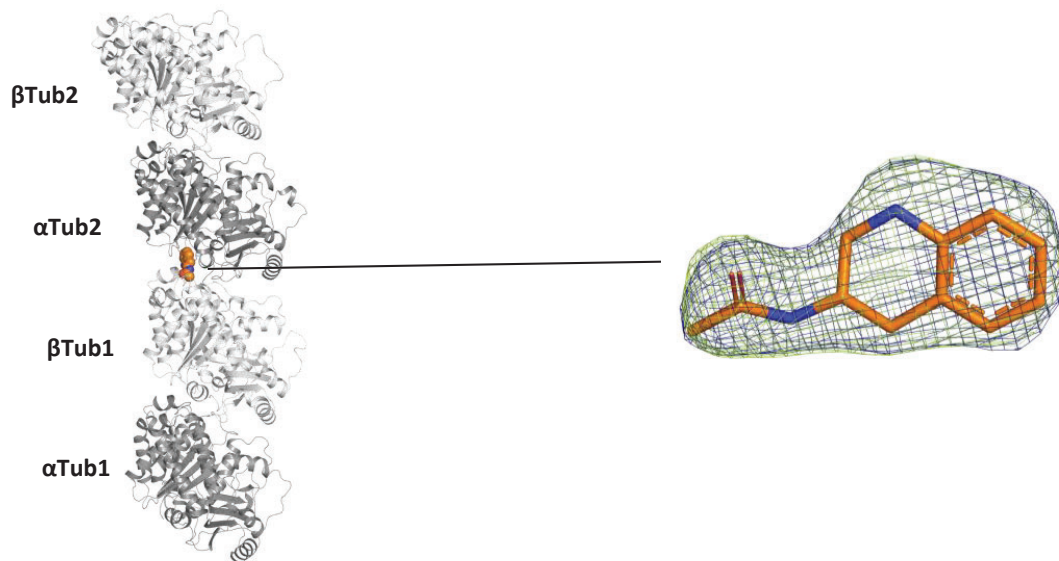

Fragment 38

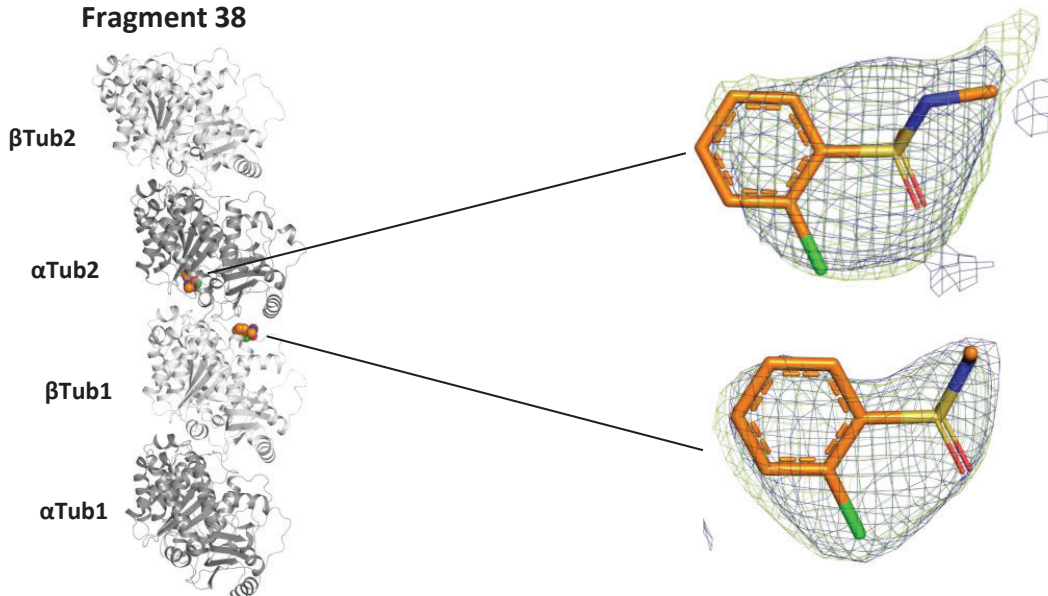

Fragment 39

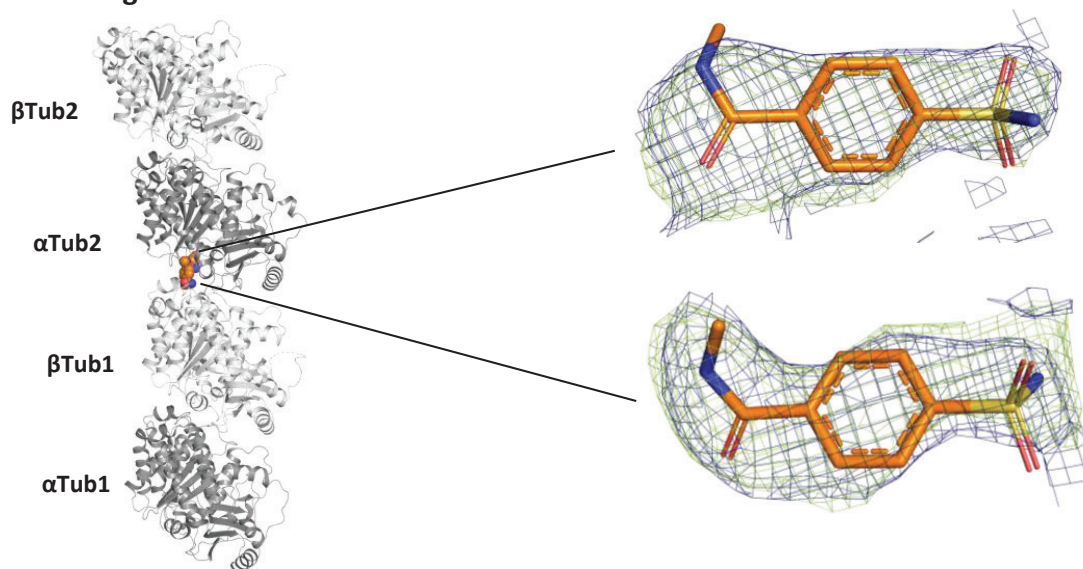

Figure S2 (continued)

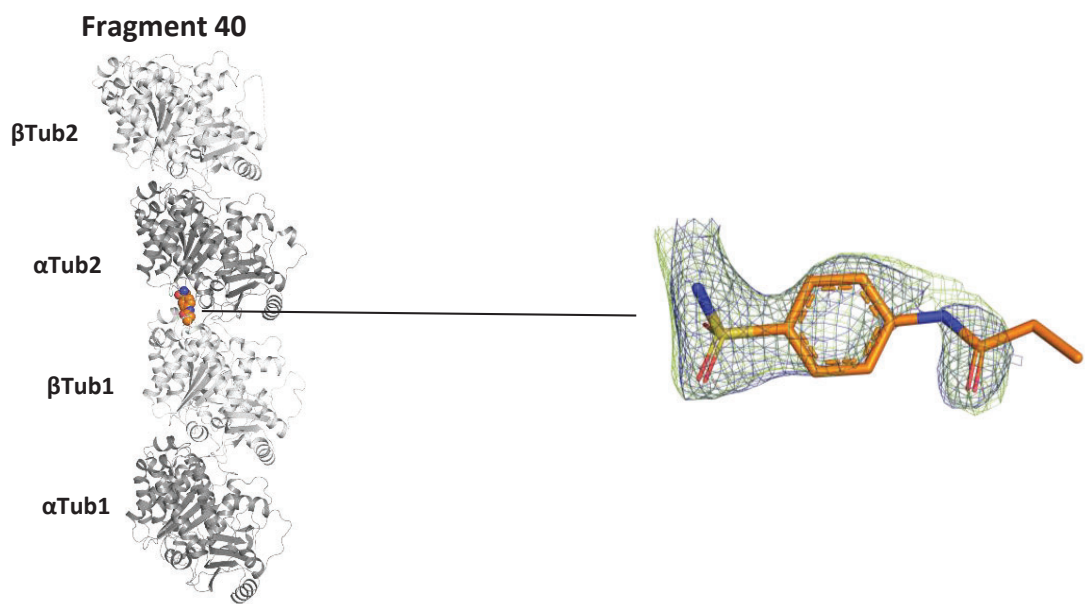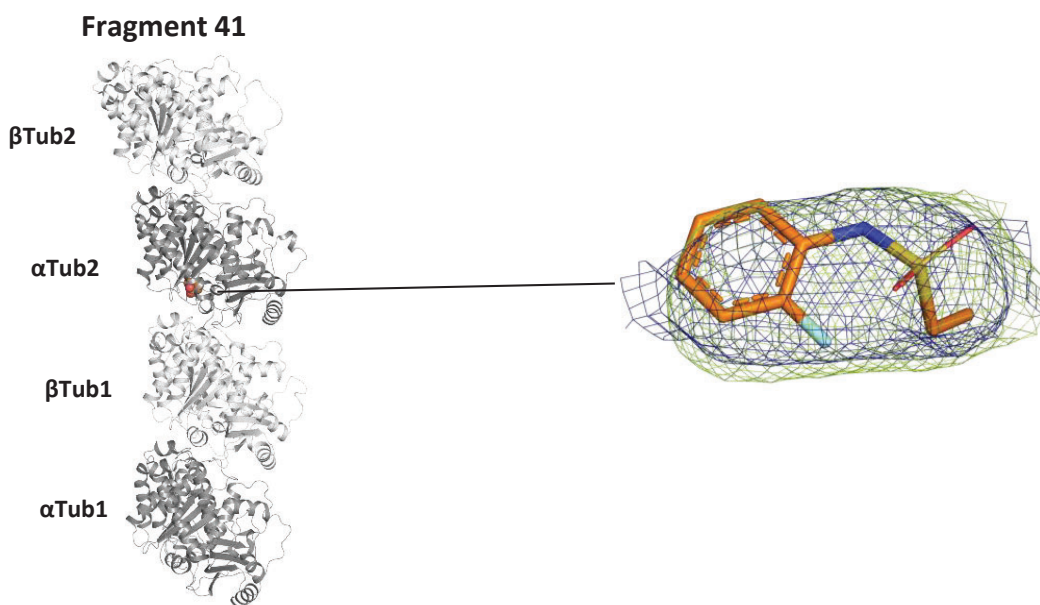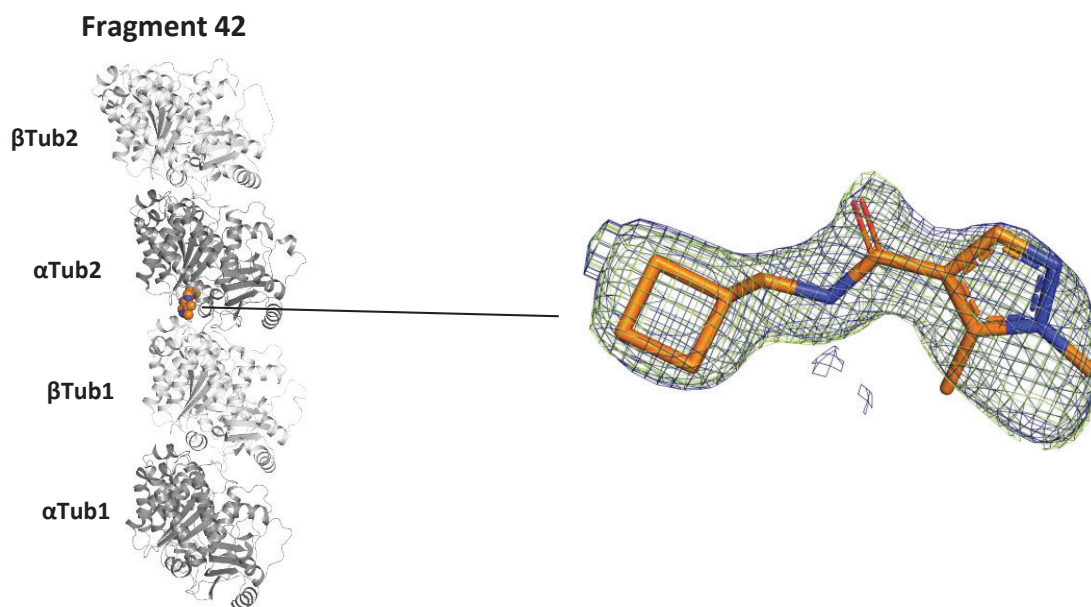

Figure S2 (continued)

Fragment 43

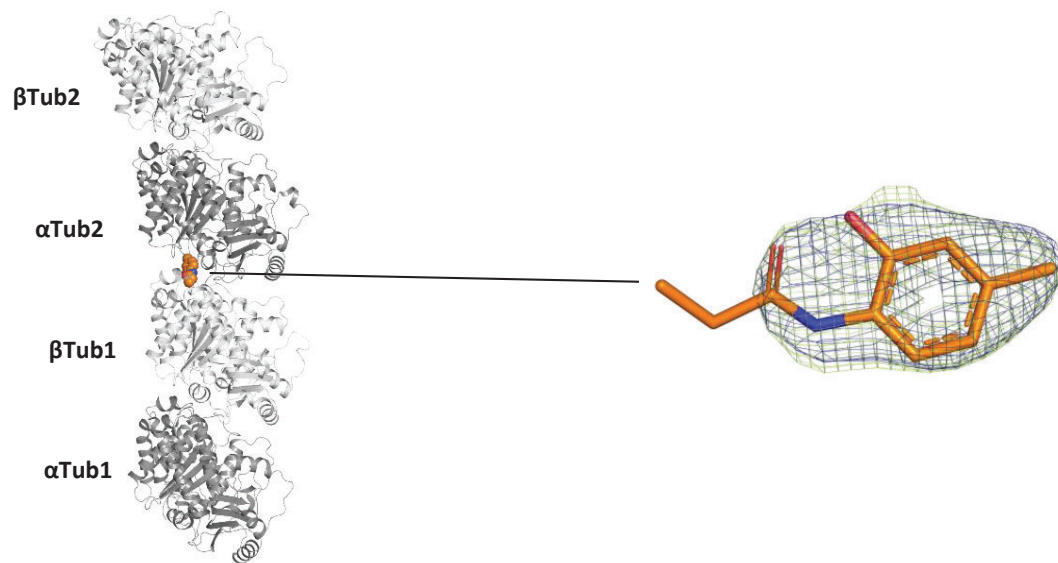

Fragment 44

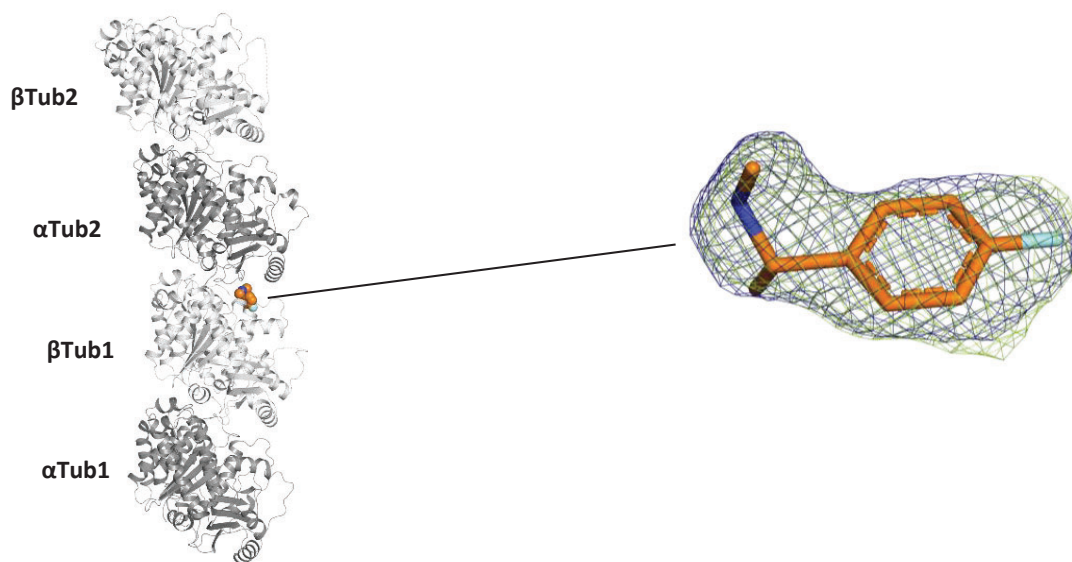

Fragment 45

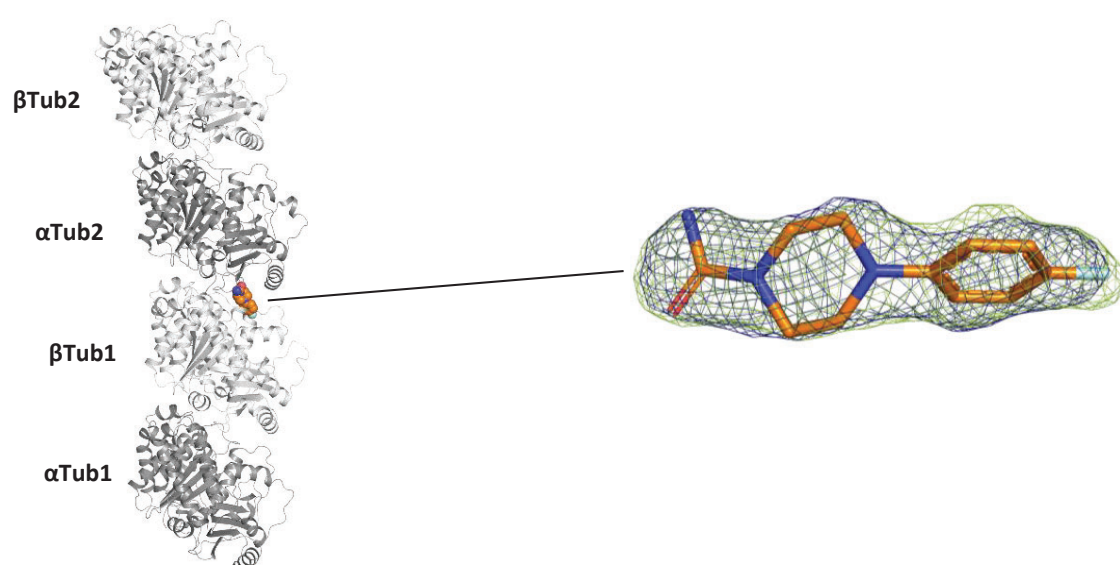

Figure S2 (continued)

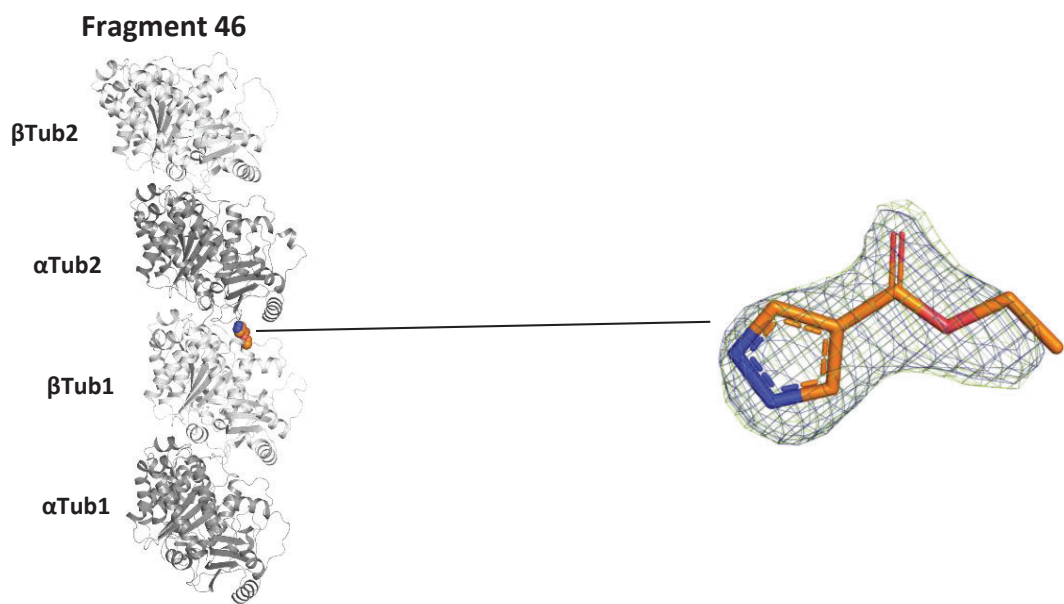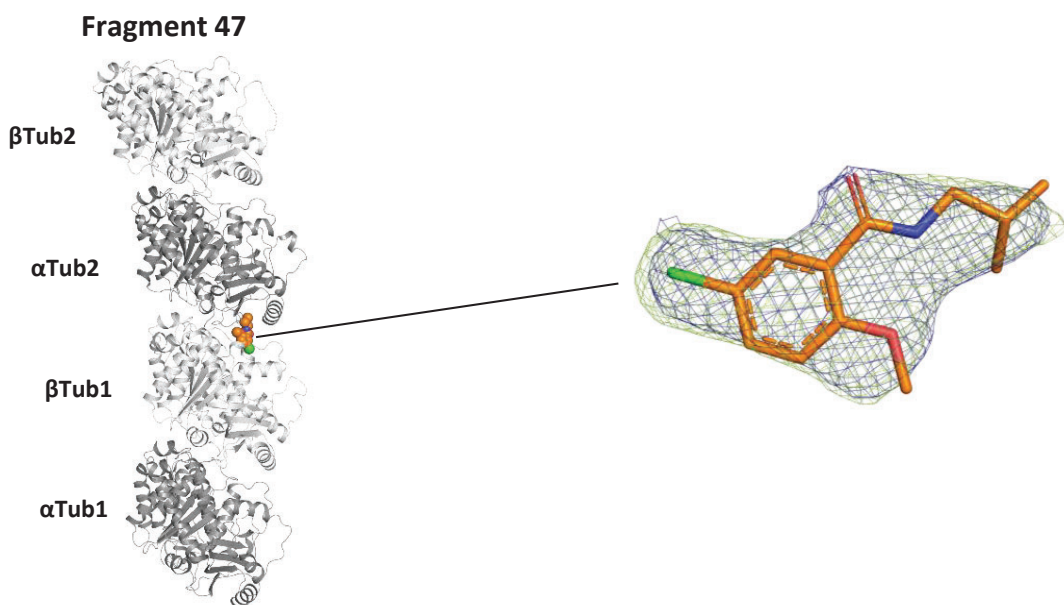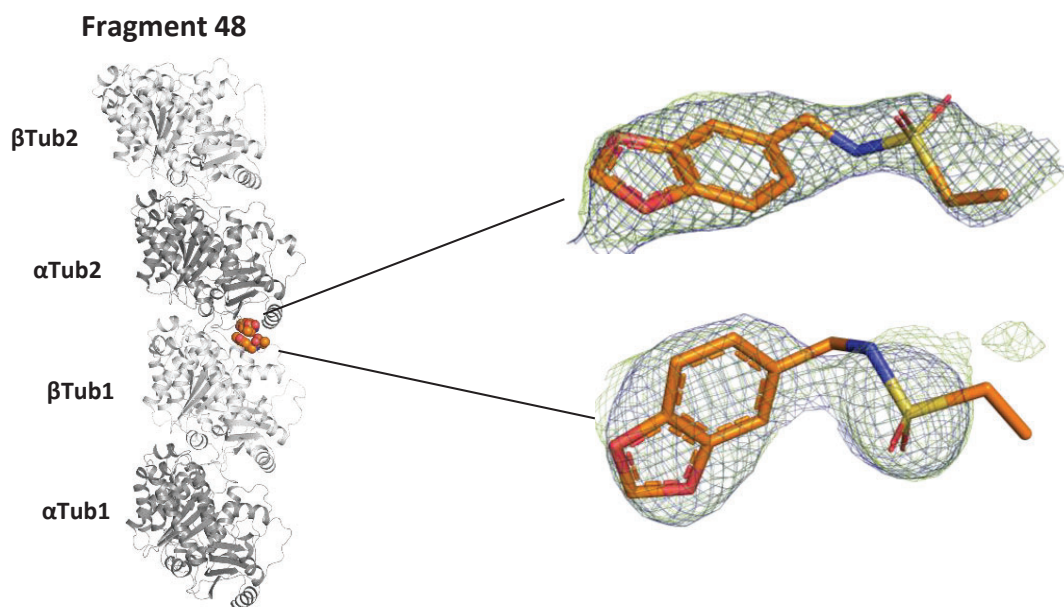



Figure S2 (continued)

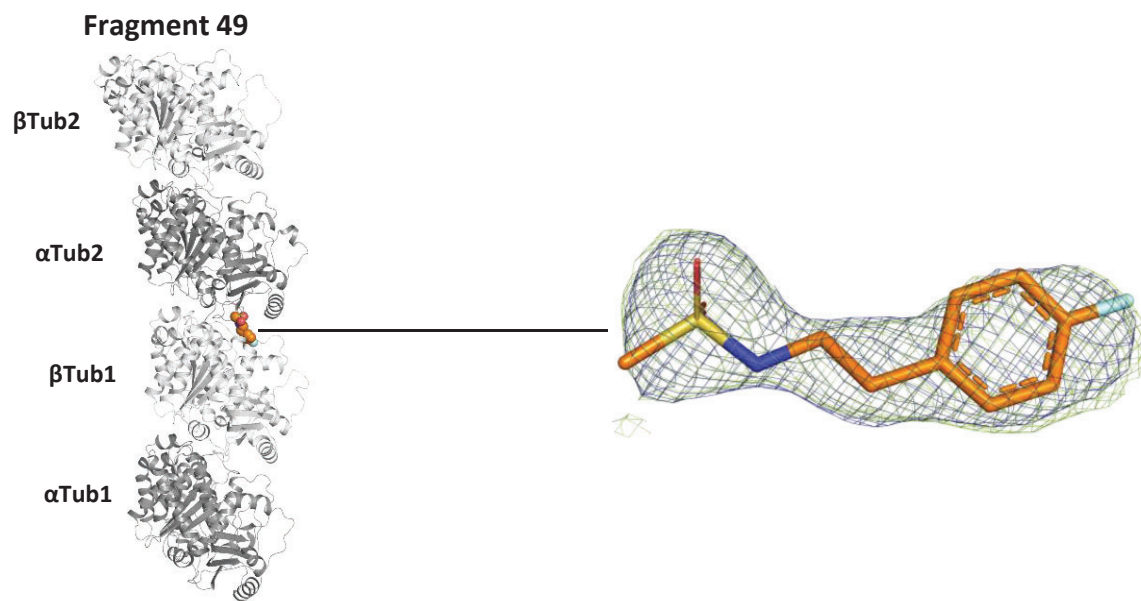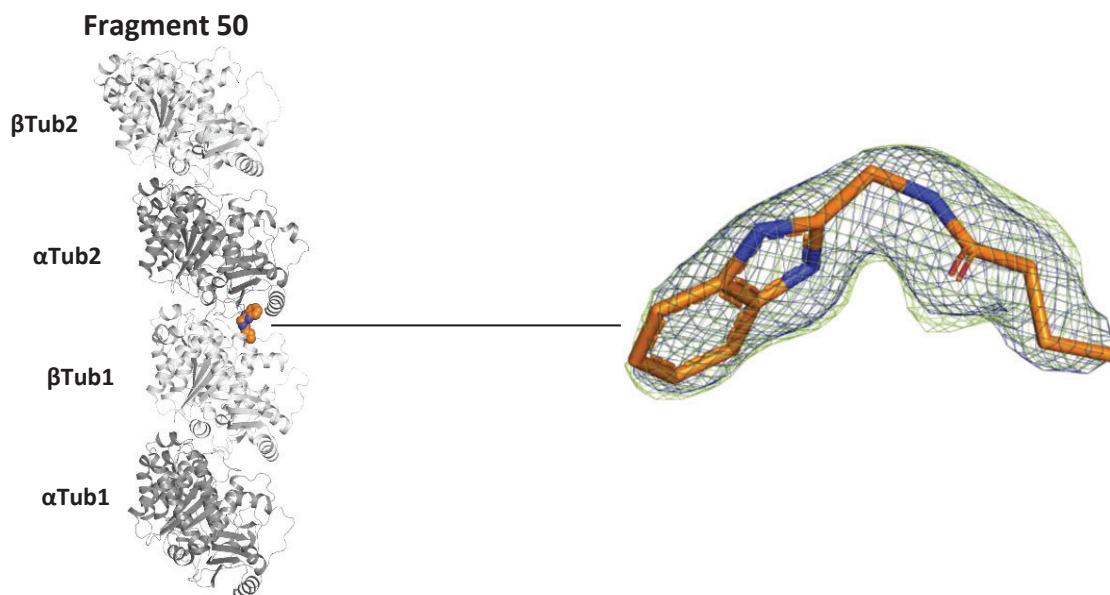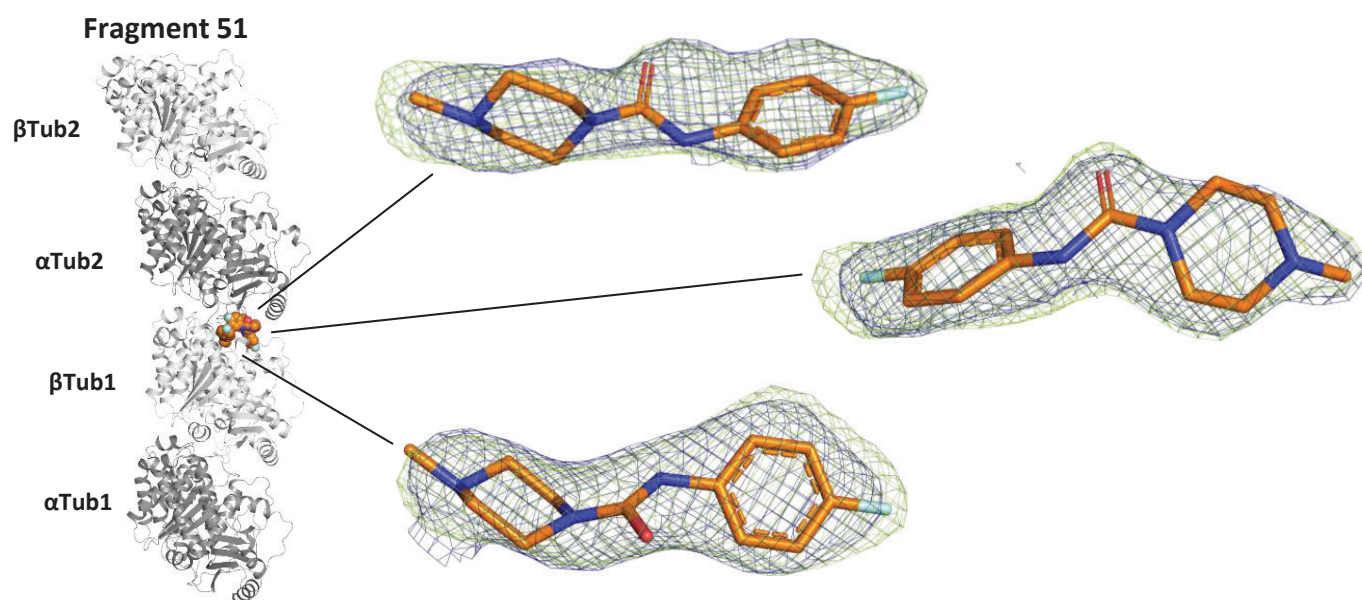

Figure S2 (continued)

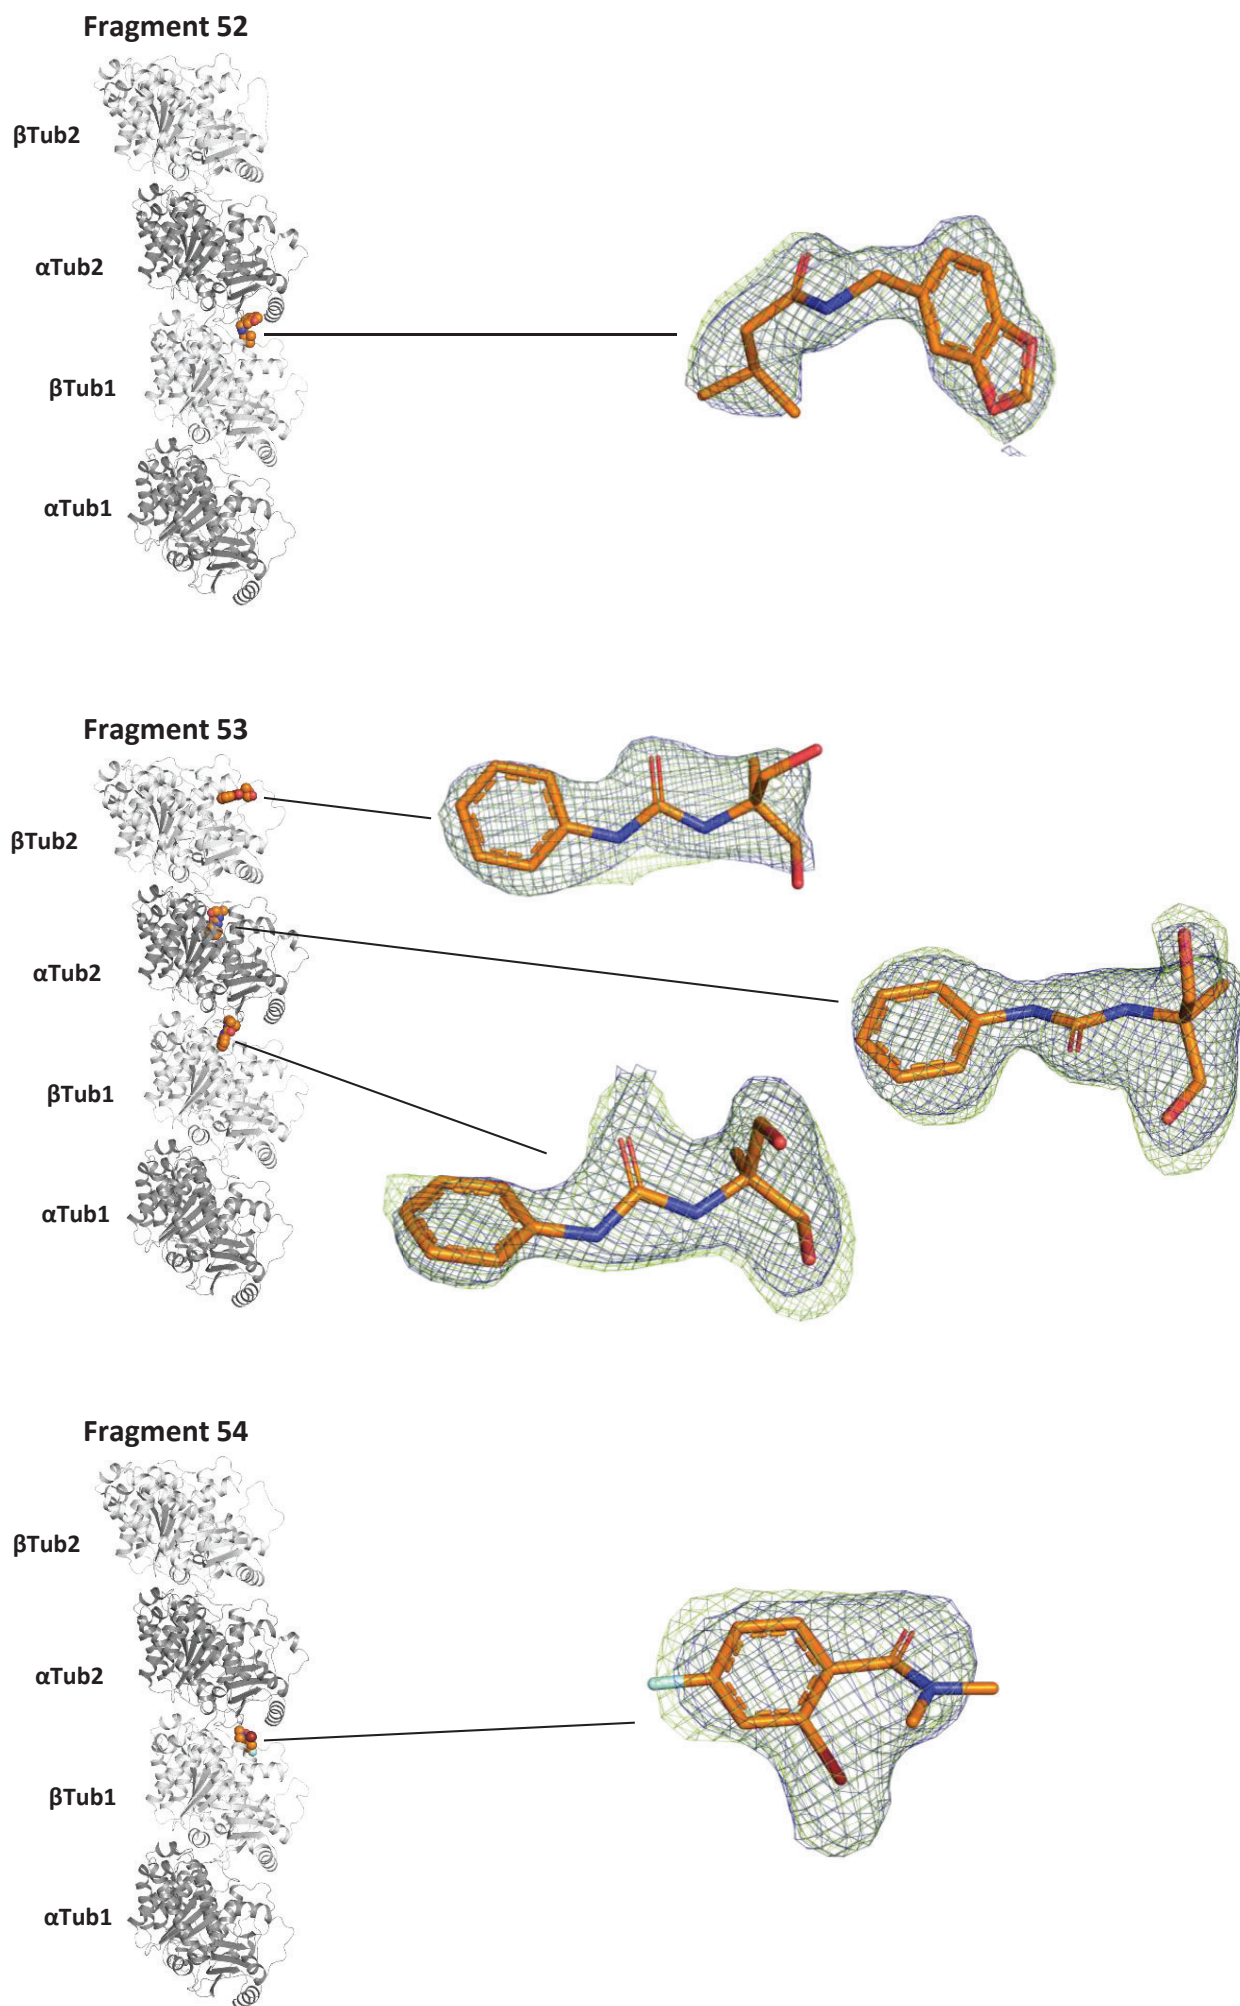

Figure S2 (continued)

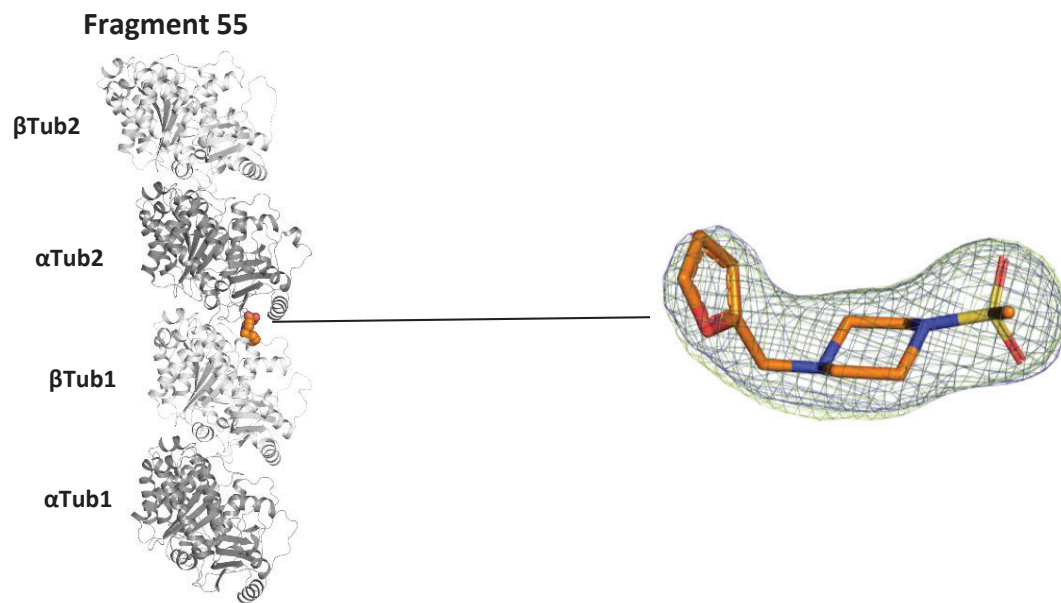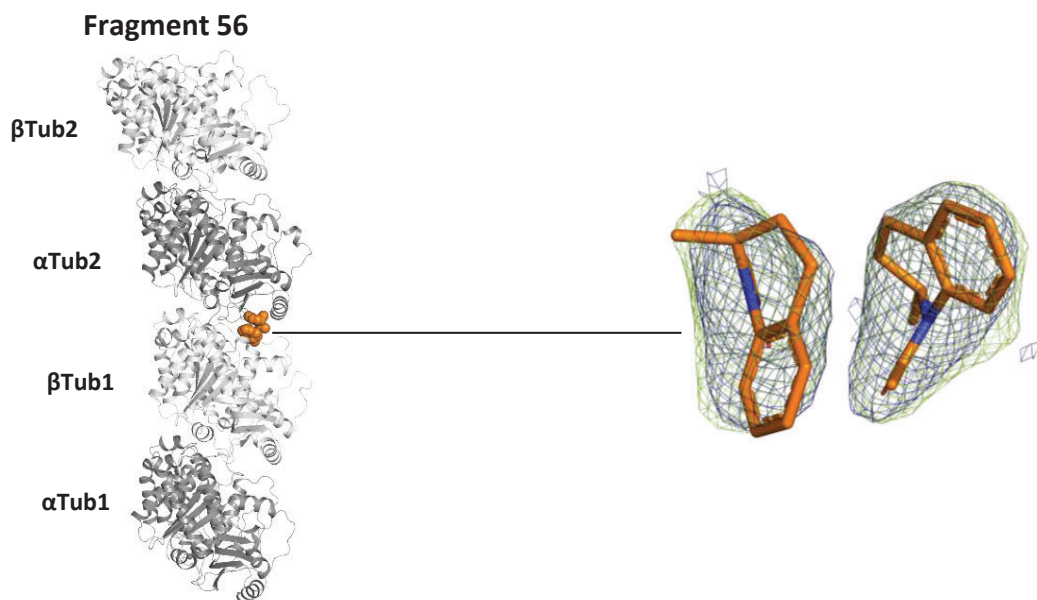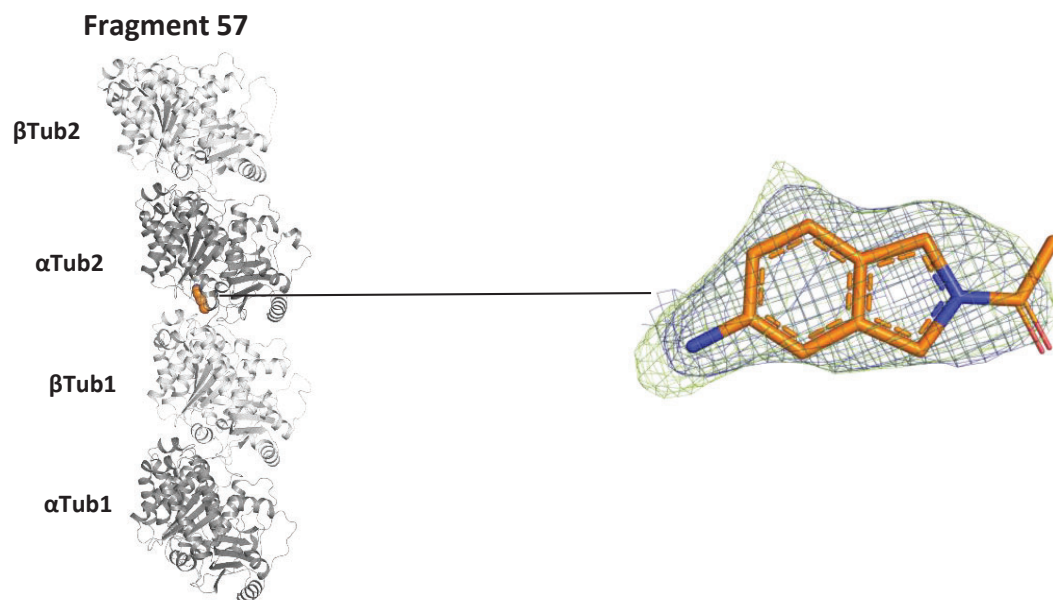

Figure S2 (continued)

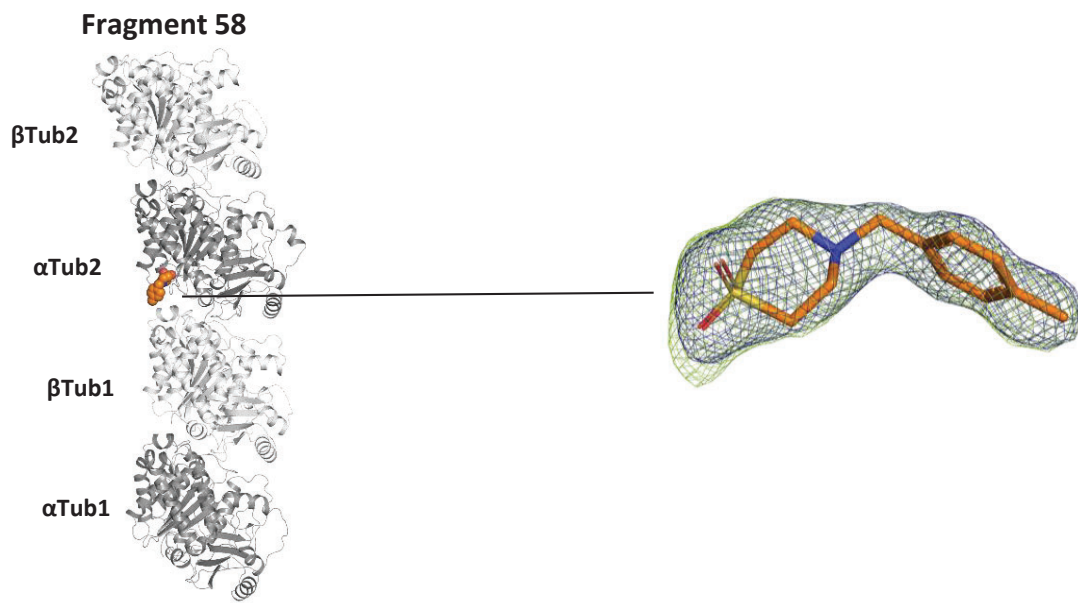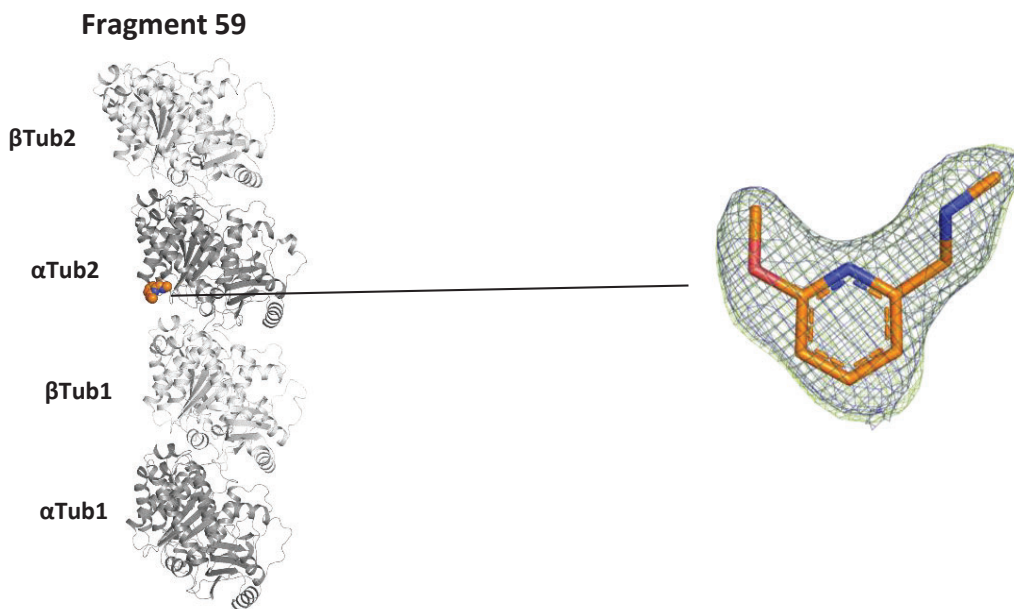

Figure S3

**$\beta$ -Tubulin**

**sID  $\beta$ I**

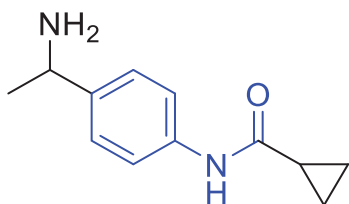

**Fragment 01**

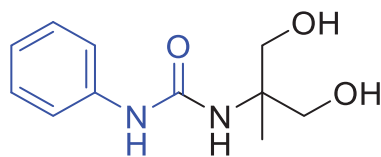

**Fragment 53, also binds to sID  $\beta$ I and  $\alpha$ II**

**sID  $\beta$ II**

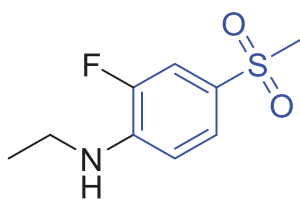

**Fragment 02, also binds to sID  $\alpha$ I**

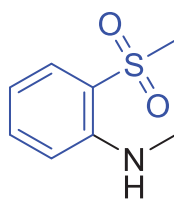

**Fragment 03, also binds to sID  $\beta$ IV and  $\beta$  $\alpha$ III**

**sID  $\beta$ III**

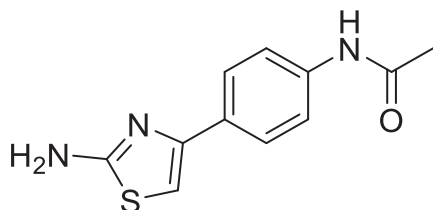

**Fragment 04, also binds to sID  $\beta$  $\alpha$ II**

**sID  $\beta$ IV**

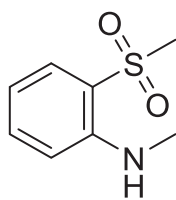

**Fragment 03, also binds to sID  $\beta$ II and  $\beta$  $\alpha$ III**

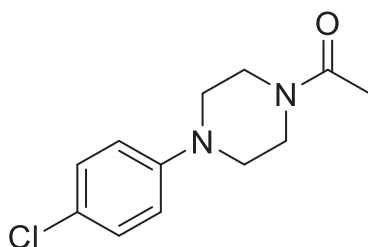

**Fragment 05, also binds to sID  $\alpha$ I,  $\beta$  $\alpha$ III and X2**

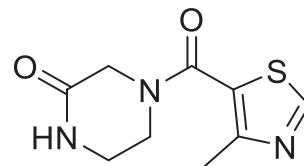

**Fragment 06**

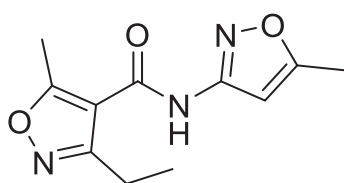

**Fragment 07 (binds twice), also binds to sID  $\beta$  $\alpha$ III**

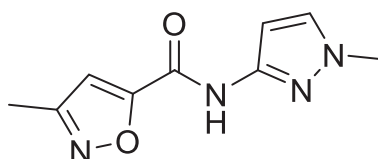

**Fragment 08 (binds twice)**

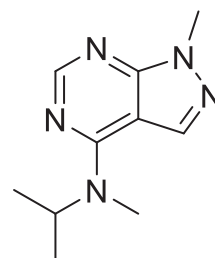

**Fragment 09**

## Figure S3 (continued)

### sID $\beta$ IV continued

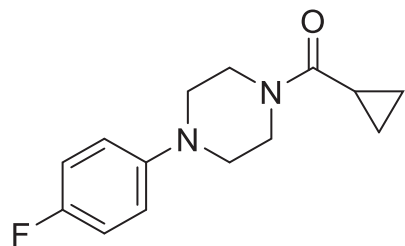

Fragment 10

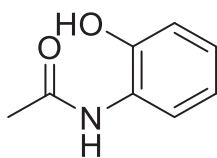

Fragment 11, also binds to sID  $\beta$ II

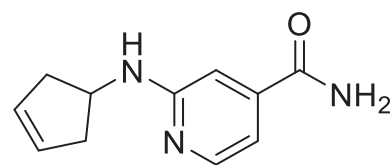

Fragment 12

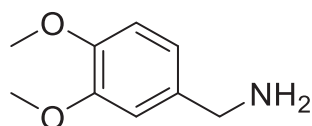

Fragment 13 (binds twice)

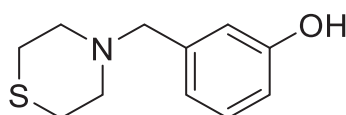

Fragment 14, also binds to sID  $\beta$ V

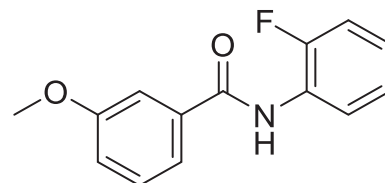

Fragment 15, also binds to sID  $\beta$ III

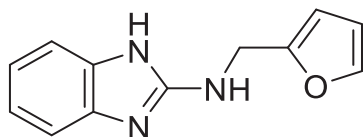

Fragment 16

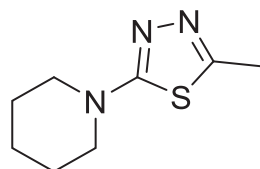

Fragment 17 (binds twice)

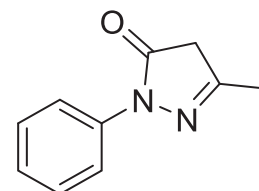

Fragment 18 (binds twice)

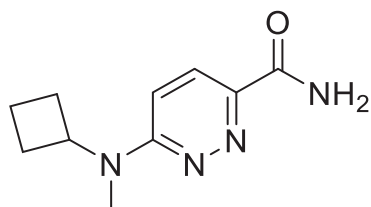

Fragment 19

### sID $\beta$ V

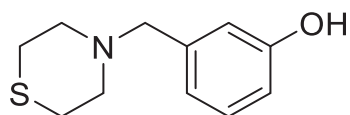

Fragment 14, also binds to sID  $\beta$ V

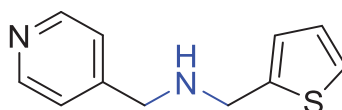

Fragment 20

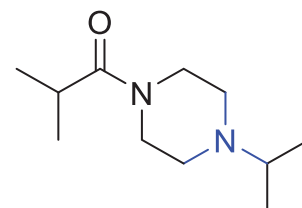

Fragment 21

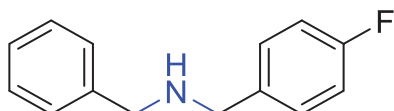

Fragment 22, also binds to sID  $\beta$ III

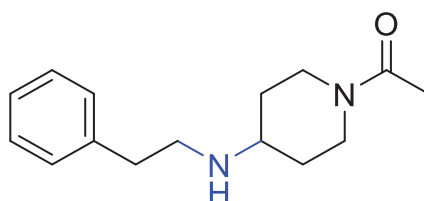

Fragment 23

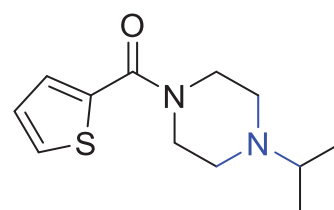

Fragment 24

## Figure S3 (continued)

### sID $\beta$ V continued

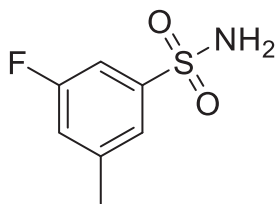

Fragment 25, also binds to sID  $\alpha$ II

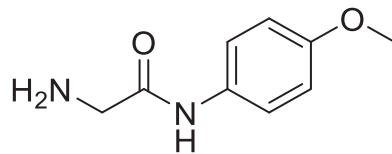

Fragment 26 (binds twice), also binds to sID  $\beta$ III and X1

### $\beta$ 1 $\alpha$ 2-Tubulin

#### sID $\beta$ $\alpha$ I

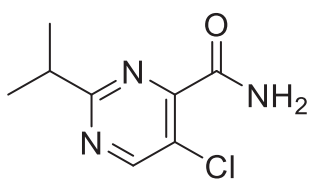

Fragment 27

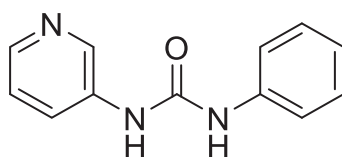

Fragment 28 (binds twice)

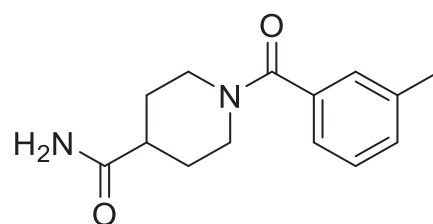

Fragment 29, also binds to sID  $\beta$ III

#### sID $\beta$ $\alpha$ II

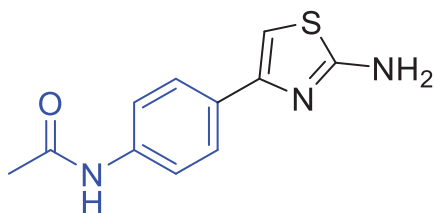

Fragment 04, also binds to sID  $\beta$ III

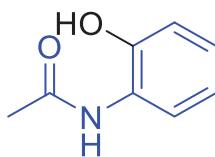

Fragment 11, also binds to sID  $\beta$ IV

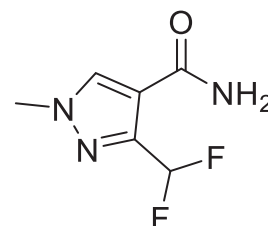

Fragment 30, also binds to sID  $\beta$ III

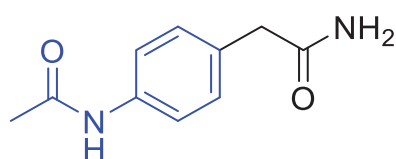

Fragment 31

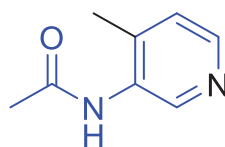

Fragment 32

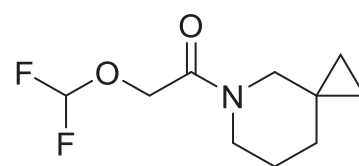

Fragment 33

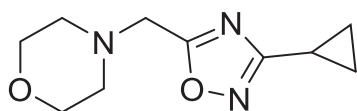

Fragment 34

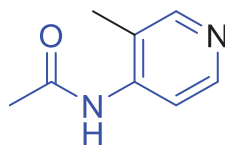

Fragment 35

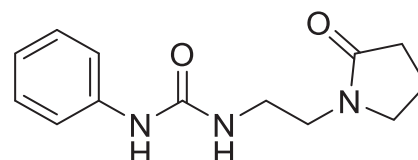

Fragment 36

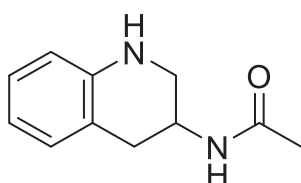

Fragment 37

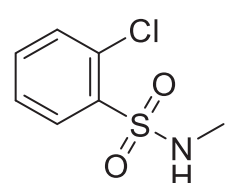

Fragment 38, also binds to sID  $\beta$ III

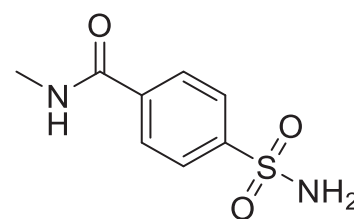

Fragment 39, also binds to sID X1

## Figure S3 (continued)

### sID $\beta$ all continued

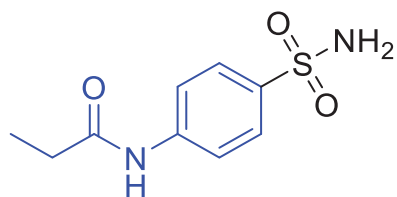

Fragment 40

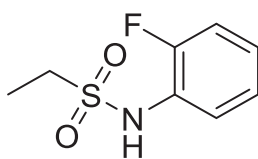

Fragment 41

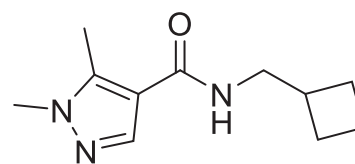

Fragment 42

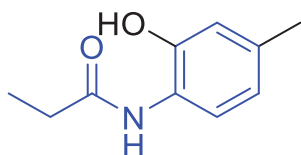

Fragment 43

### sID $\beta$ all

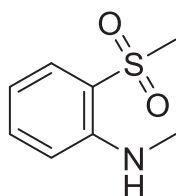

Fragment 03, also binds to sID  $\beta$ II and  $\beta$ IV

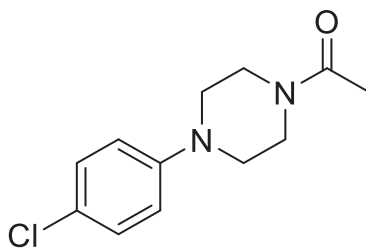

Fragment 05 (binds twice), also binds to sID  $\alpha$ I,  $\beta$ IV and X2

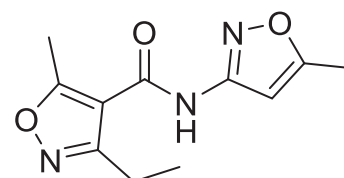

Fragment 07, also binds to sID  $\beta$ IV

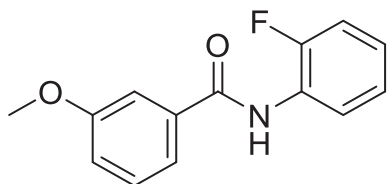

Fragment 15, also binds to sID  $\beta$ IV

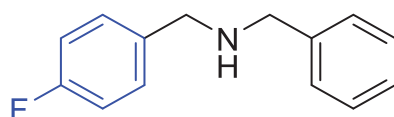

Fragment 22, also binds to sID  $\beta$ V

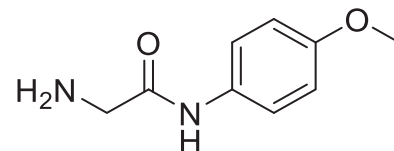

Fragment 26, also binds to sID  $\beta$ V and X1

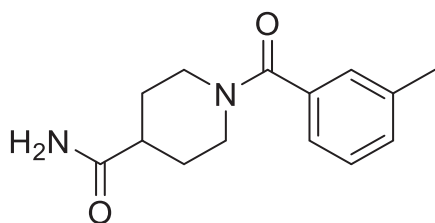

Fragment 29, also binds to sID  $\beta$ al

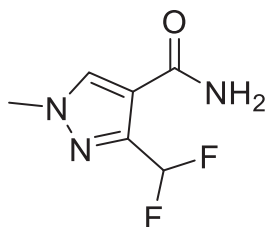

Fragment 30, also binds to sID  $\beta$ all

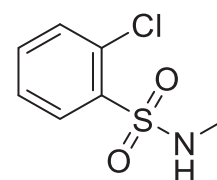

Fragment 38, also binds to sID  $\beta$ all

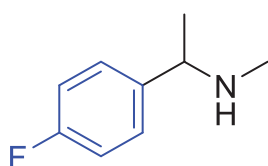

Fragment 44

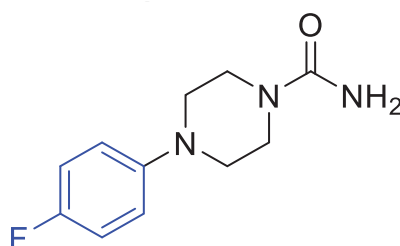

Fragment 45

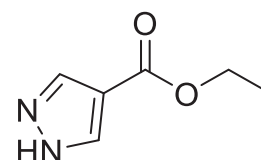

Fragment 46



## Figure S3 (continued)

### sID $\beta$ III continued

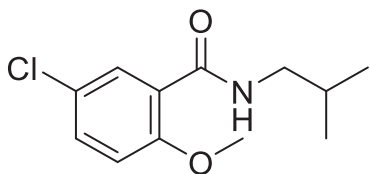

Fragment 47

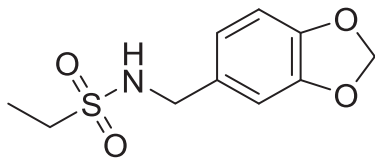

Fragment 48 (binds twice)

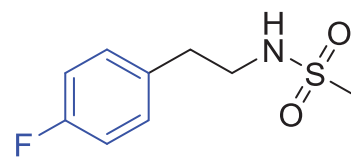

Fragment 49

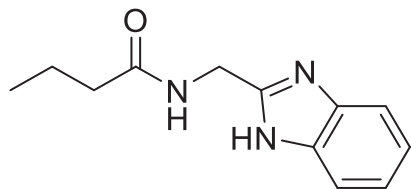

Fragment 50

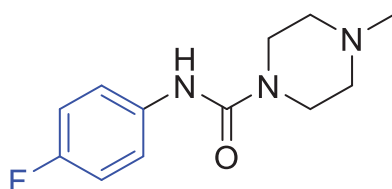

Fragment 51

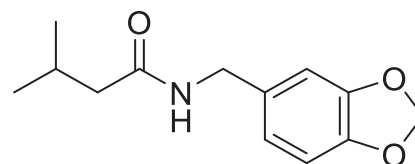

Fragment 52

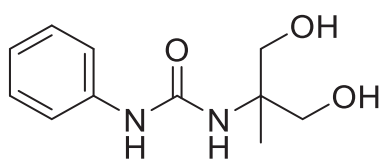

Fragment 53, also binds to sID  $\beta$ I and  $\alpha$ II

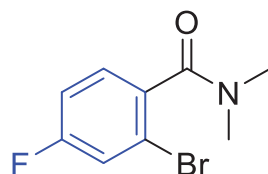

Fragment 54

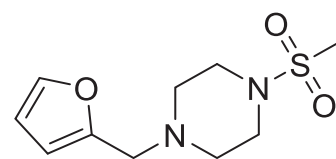

Fragment 55

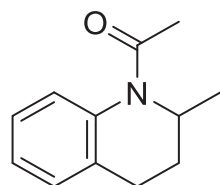

Fragment 56 (binds twice)

### $\alpha$ -Tubulin

#### sID $\alpha$ I

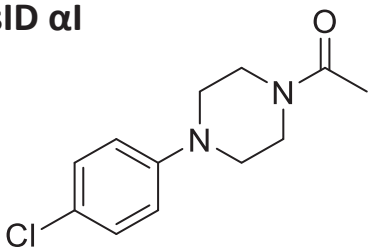

Fragment 05, also binds to sID  $\beta$ IV,  $\beta$ III and X2

#### sID $\alpha$ II

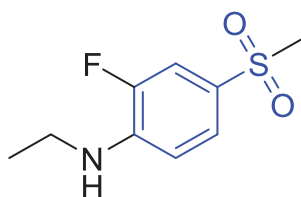

Fragment 02, also binds to sID  $\beta$ II

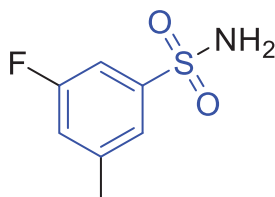

Fragment 25, also binds to sID  $\beta$ V

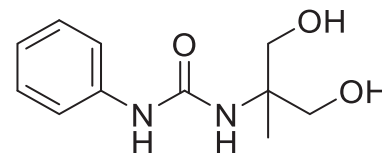

Fragment 53, also binds to sID  $\beta$ I and  $\beta$ III

## Figure S3 (continued)

### Crystal contact/binding partner in T<sub>2</sub>R-TTL

#### sID X1

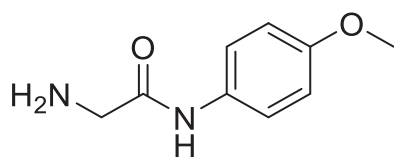

Fragment 26, also binds to sID  $\beta$ V and  $\beta$ III

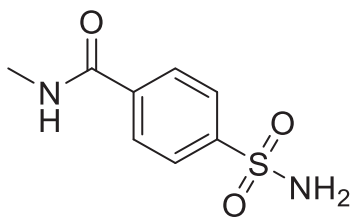

Fragment 39, also binds to sID  $\beta$ II

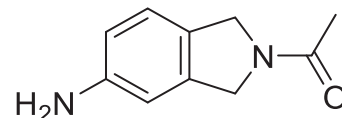

Fragment 57

#### sID X2

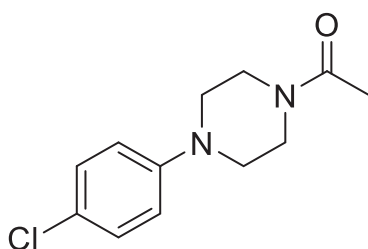

Fragment 05, also binds to sID  $\alpha$ I,  $\beta$ IV and  $\beta$ III

#### sID X3

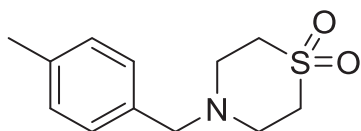

Fragment 58

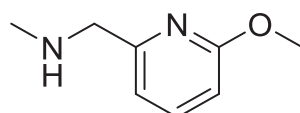

Fragment 59
