# Supplementary material for: Comprehensive Analysis of Binding Sites in Tubulin
Source: PubMed Central journal article supplement — Angew Chem Int Ed Engl. 2021 May 5;60(24):13331–42. doi: 10.1002/anie.202100273 (PMC8251789; doi:10.1002/anie.202100273), 2021-05-05
Supplement: ANIE-60-13331-s008.pdf [file ANIE-60-13331-s008.pdf]

**Table S3. Tubulin fragment-binding sites identified by X-ray crystallography.**

**β-Tubulin**

| sID <sup>1</sup> | SS <sup>2</sup>                                                                    | ResID <sup>3</sup>                                                                                                                                                             | Fragment ID <sup>4</sup>                                                   | V <sub>f</sub> <sup>5</sup><br>(Å <sup>3</sup> ) | PDB ID <sup>6</sup>                                                                                  | Notes                                                                                                                                                                                       |
|------------------|------------------------------------------------------------------------------------|--------------------------------------------------------------------------------------------------------------------------------------------------------------------------------|----------------------------------------------------------------------------|--------------------------------------------------|------------------------------------------------------------------------------------------------------|---------------------------------------------------------------------------------------------------------------------------------------------------------------------------------------------|
| βI               | βH6<br>βH9<br>βH9-βS8                                                              | βAsp 211<br>βIle 212<br>βArg 215<br>βThr 216<br>βLys 218<br>βSer 298<br>βLys 299                                                                                               | 01<br>53                                                                   | 173                                              | 5S4L<br>5S61                                                                                         | Unknown ligand-binding site<br><br>Residue substitutions in human β-tubulin isotypes: β2a/β2b, A298S; β1/β6, K299R; β8, R215K                                                               |
| βII              | βH1<br>βH7<br>βS7<br>βM<br>βS8<br>βS9-βS10<br>βS10                                 | βVal 23<br>βGlu 27<br>βHis 229<br>βAla 233<br>βThr 234<br>βSer 236<br>βGly 237<br>βPhe 272<br>βPro 274<br>βArg 320<br>βPro 360<br>βArg 369<br>βLeu 371<br>βSer 374<br>βThr 376 | 02<br>03                                                                   | 207                                              | 5S4M<br>5S4N                                                                                         | Taxane site<br><br>Residue substitutions in human β-tubulin isotypes: β1, V23M, A233L, A374S; β4a/β5/β6, S374A                                                                              |
| βIII             | βN-ter<br>βH1'<br>βT7                                                              | αThr 73<br>βMet 1<br>βLeu 46<br>βGlu 47<br>βArg 48<br>βIle 49<br>βAsn 50<br>βVal 51<br>βAla 250<br>βAsp 251                                                                    | 04                                                                         | 179                                              | 5S4O                                                                                                 | Unknown ligand-binding site<br><br>Residue substitutions in human β-tubulin isotypes: β5, E47D, N50S                                                                                        |
| βIV              | αT5<br>βS1<br>βH1'<br>βS4<br>βS5<br>βS6<br>βH7<br>βT7<br>βH8<br>βS8<br>βS9<br>βS10 | αThr 179<br>αAla 180<br>αVal 181<br>βIle 4<br>βTyr 52<br>βGln 136<br>βAsn 167<br>βPhe 169<br>βGlu 200<br>βTyr 202<br>βVal 238<br>βThr 239<br>βCys 241                          | 03<br>05<br>06<br>07<br>08<br>09<br>10<br>11<br>12<br>13<br>14<br>15<br>16 | 780                                              | 5S4N<br>5S4P<br>5S4Q<br>5S4R<br>5S4S<br>5S4T<br>5S4U<br>5S4V<br>5S4W<br>5S4X<br>5S4Y<br>5S4Z<br>5S50 | Colchicine site<br><br>Residue substitutions in human β-tubulin isotypes: β1, E200A, Y202F, V238I, C241S, A317C, V318I, T353V; β2a/β2b, V318I; β3/β6, C241S, A317T, T353V; β8, Y202F, V318I |

|    |                                                                           |                                                                                                                                                                                                                                                                                  |                                              |     |                                                              |                                                                                                                                                                         |
|----|---------------------------------------------------------------------------|----------------------------------------------------------------------------------------------------------------------------------------------------------------------------------------------------------------------------------------------------------------------------------|----------------------------------------------|-----|--------------------------------------------------------------|-------------------------------------------------------------------------------------------------------------------------------------------------------------------------|
|    |                                                                           | βLeu 242<br>βGln 247<br>βLeu 248<br>βAsn 249<br>βAla 250<br>βLeu 252<br>βLeu 255<br>βAla 256<br>βAsn 258<br>βMet 259<br>βPhe 268<br>βAla 316<br>βAla 317<br>βIle 318<br>βAsn 350<br>βLys 352<br>βThr 353<br>βAla 354<br>βIle 378                                                 | 17<br>18<br>19                               |     | 5S51<br>5S52<br>5S53                                         |                                                                                                                                                                         |
| βV | αH11'<br>βS4<br>βH4<br>βH4-βS5<br>βS5<br>βH5<br>βH5-βS6<br>βH8<br>βH8-βS7 | αHis 406<br>αVal 409<br>αGly 410<br>αGlu 411<br>βPhe 135<br>βIle 154<br>βIle 157<br>βArg 158<br>βTyr 161<br>βPro 162<br>βAsp 163<br>βArg 164<br>βIle 165<br>βMet 166<br>βVal 195<br>βGlu 196<br>βAsn 197<br>βThr 198<br>βAsp 199<br>βArg 253<br>βPro 263<br>βArg 264<br>βHis 266 | 14<br>20<br>21<br>22<br>23<br>24<br>25<br>26 | 669 | 5S4Y<br>5S54<br>5S55<br>5S56<br>5S57<br>5S58<br>5S59<br>5S5A | Unknown ligand-binding site<br><br>Residue substitutions in human β-tubulin isotypes: β1, I154L, V195I, T198A; β3, I157V; β4a/β6, Y161F; β8, I154M, M166I, V195I, T198A |

**β1α2-Tubulin**

| sID <sup>1</sup> | SS <sup>2</sup>                                                                      | ResID <sup>3</sup>                                                                                                                                                                                                                                                                         | Fragment ID <sup>4</sup>                                                                     | V <sub>f</sub> <sup>5</sup><br>(Å <sup>3</sup> ) | PDB ID <sup>6</sup>                                                                                                          | Notes                                                                                                                                                    |
|------------------|--------------------------------------------------------------------------------------|--------------------------------------------------------------------------------------------------------------------------------------------------------------------------------------------------------------------------------------------------------------------------------------------|----------------------------------------------------------------------------------------------|--------------------------------------------------|------------------------------------------------------------------------------------------------------------------------------|----------------------------------------------------------------------------------------------------------------------------------------------------------|
| βαI              | αH8-αS7<br>αH12<br>βH11-βH11'                                                        | αTyr 262<br>αPro 263<br>αArg 264<br>αIle 265<br>αAsp 431<br>αGlu 434<br>αVal 435<br>βArg 400<br>βArg 401<br>βLys 402                                                                                                                                                                       | 27<br>28<br>29                                                                               | 511                                              | 5S5B<br>5S5C<br>5S5D                                                                                                         | Unknown ligand-binding site<br><br>Residue substitution in human β-tubulin isotypes: β1, R400K                                                           |
| βαII             | αH3-S4<br>αS4<br>αH4-αS5<br>αS6<br>αH8<br>βT3<br>βH3'<br>βT5<br>βH11'                | αCys 4<br>αGln 133<br>αGly 134<br>αPhe 135<br>αLeu 136<br>αSer 165<br>αLeu 167<br>αAsp 199<br>αCys 200<br>αPhe 202<br>αLeu 242<br>αLeu 252<br>αThr 253<br>αGln 256<br>αThr 257<br>αLeu 259<br>βGly 100<br>βAsn 101<br>βAsn 102<br>βLys 105<br>βVal 182<br>βTrp 407<br>βTyr 408<br>βGlu 411 | 04<br>11<br>30<br>31<br>32<br>33<br>34<br>35<br>36<br>37<br>38<br>39<br>40<br>41<br>42<br>43 | 632                                              | 5S4O<br>5S4V<br>5S5E<br>5S5F<br>5S5G<br>5S5H<br>5S5I<br>5S5J<br>5S5K<br>5S5L<br>5S5M<br>5S5N<br>5S5O<br>5S5P<br>5S5Q<br>5S5R | Unknown ligand-binding site<br><br>Located between the maytansine and pironetin sites<br><br>Residue substitution in human β-tubulin isotypes: β6, Y408F |
| βαIII            | αT7<br>αH8<br>αH10<br>αH10-αS9<br>αS9<br>βT5<br>βH5<br>βH6<br>βH6-βH7<br>βH7<br>βH11 | αLeu 248<br>αVal 250<br>αAsn 258<br>αPro 325<br>αVal 328<br>αAsn 329<br>αIle 332<br>αPro 348<br>αGly 350<br>αPhe 351<br>αLys 352<br>αVal 353<br>αGly 354<br>αIle 355<br>βPro 173                                                                                                           | 03<br>05<br>07<br>15<br>22<br>26<br>29<br>30<br>38<br>44<br>45<br>46<br>47<br>48<br>49       | 1139                                             | 5S4N<br>5S4P<br>5S4R<br>5S4Z<br>5S56<br>5S5A<br>5S5D<br>5S5E<br>5S5M<br>5S5S<br>5S5T<br>5S5U<br>5S5V<br>5S5W<br>5S5X         | Vinblastine site<br><br>Residue substitution in human β-tubulin isotypes: β1, Q394H                                                                      |

|  |  |          |    |  |      |  |
|--|--|----------|----|--|------|--|
|  |  | βSer 174 | 50 |  | 5S5Y |  |
|  |  | βPro 175 | 51 |  | 5S5Z |  |
|  |  | βLys 176 | 52 |  | 5S60 |  |
|  |  | βVal 177 | 53 |  | 5S61 |  |
|  |  | βSer 178 | 54 |  | 5S62 |  |
|  |  | βAsp 179 | 55 |  | 5S63 |  |
|  |  | βThr 180 | 56 |  | 5S64 |  |
|  |  | βVal 181 |    |  |      |  |
|  |  | βGlu 183 |    |  |      |  |
|  |  | βPro 184 |    |  |      |  |
|  |  | βTyr 210 |    |  |      |  |
|  |  | βThr 221 |    |  |      |  |
|  |  | βPro 222 |    |  |      |  |
|  |  | βThr 223 |    |  |      |  |
|  |  | βTyr 224 |    |  |      |  |
|  |  | βLeu 227 |    |  |      |  |
|  |  | βGln 394 |    |  |      |  |

### α-Tubulin

| sID <sup>1</sup> | SS <sup>2</sup>              | ResID <sup>3</sup>                                                                                                                                        | Fragment ID <sup>4</sup> | V <sub>f</sub> <sup>5</sup><br>(Å <sup>3</sup> ) | PDB ID <sup>6</sup>  | Notes                                                                                                  |
|------------------|------------------------------|-----------------------------------------------------------------------------------------------------------------------------------------------------------|--------------------------|--------------------------------------------------|----------------------|--------------------------------------------------------------------------------------------------------|
| αI               | αH6<br>αM<br>αH9             | αArg 215<br>αAsn 216<br>αPro 274<br>αVal 275<br>αLys 280<br>αLeu 286<br>αAla 294                                                                          | 05                       | 185                                              | 5S4P                 | Unknown ligand-binding site<br><br>Residue substitutions in human α-tubulin isotypes: α8, V275I, A294S |
| αII              | αH1<br>αH2<br>αH2-αS3<br>αH7 | αGln 15<br>αAsn 18<br>αAla 19<br>αTrp 21<br>αGlu 22<br>αGlu 77<br>αVal 78<br>αGly 81<br>αThr 82<br>αTyr 83<br>αPhe 87<br>αThr 225<br>αAsn 228<br>αArg 229 | 02<br>25<br>53           | 364                                              | 5S4M<br>5S59<br>5S61 | Unknown ligand-binding site<br><br>Residue substitutions in human α-tubulin isotypes: α4a, V78I, T82P  |

**Crystal contact/binding partner of T<sub>2</sub>R-TTL**

| sID <sup>1</sup> | SS <sup>2</sup>         | ResID <sup>3</sup>                                                                                       | Fragment ID <sup>4</sup> | V <sub>f</sub> <sup>5</sup><br>(Å <sup>3</sup> ) | PDB ID <sup>6</sup>  | Notes                                                                      |
|------------------|-------------------------|----------------------------------------------------------------------------------------------------------|--------------------------|--------------------------------------------------|----------------------|----------------------------------------------------------------------------|
| X1               | αH1-αS2                 | αThr 41<br>αIle 42<br>αGly 43<br>αGly 44<br>αGly 45<br>αAsp 46                                           | 26<br>39<br>57           | -                                                | 5S5A<br>5S5N<br>5S65 | Site involving a crystal contact formed by a neighboring α-tubulin monomer |
| X2               | αH2- αS3<br>αH3         | αHis 88<br>αGlu 90<br>αGln 91<br>αArg 121<br>αLys 124<br>αLeu 125                                        | 05                       | -                                                | 5S4P                 | Site involving a crystal contact formed by a neighboring TTL molecule      |
| X3               | αH4-αS5<br>αH5<br>βH11' | αSer 158<br>αGly 162<br>αLys 163<br>αLys 166<br>αGlu 196<br>αHis 197<br>αSer 198<br>αAsp 199<br>βGly 410 | 58<br>59                 | -                                                | 5S66<br>5S67         | Site involving residues of RB3                                             |

<sup>1</sup>Fragment site identifiers. X1, X2 and X3 refer to sites that involve either a crystal contact (X1 and X2) or a tubulin-binding partner of the T<sub>2</sub>R-TTL complex (X3).

<sup>2</sup>Secondary structural elements involved in site formation.

<sup>3</sup>Residues that are in contact with the identified fragments (maximal distance of 4 Å).

<sup>4</sup>Fragment ID according to the deposited structures in the RCSB Protein Data Bank.

<sup>5</sup>Total fragment volume.

<sup>6</sup>PDB IDs for the deposited structures in the RCSB Protein Data Bank.
